# Supplementary material for: Synthesis of 6-methyl-3,4-dihydropyrazinones using an Ugi 4-CR/allenamide cycloisomerization protocol
Source: Royal Society of Chemistry journal article supplement (doi:10.1039/c6ob02266a), 2016-11-24
Supplement: c6ob02266a1.pdf [file c6ob02266a1.pdf]

## SUPPORTING INFORMATION

### Synthesis of 6-methyl-3,4-dihydropyrazinones using a Ugi 4-CR/allenamide cycloisomerization protocol

Estefanía Icelo-Ávila,<sup>a</sup> Yoarhy A. Amador-Sánchez,<sup>a</sup> Luis A. Polindara-García,<sup>\*a</sup> Luis D. Miranda<sup>\*a</sup>

*Instituto de Química, Universidad Nacional Autónoma de México, Ciudad Universitaria, 04510, Ciudad de México, México.*

|                                            |     |
|--------------------------------------------|-----|
| Ugi adducts spectra <b>11a-x</b>           | S2  |
| Dihydropyrazinone spectra <b>13a-x</b>     | S27 |
| Tricyclic pyrazinones spectra <b>14q-x</b> | S55 |
| X-Ray crystallographic data                | S63 |

## Ugi Adducts spectra

***N*-(2,6-dimethylphenyl)-2-(*N*-(prop-2-yn-1-yl)acetamido)pentanamide (11a)**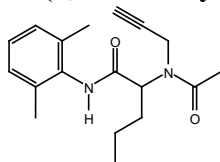300 MHz, CDCl<sub>3</sub>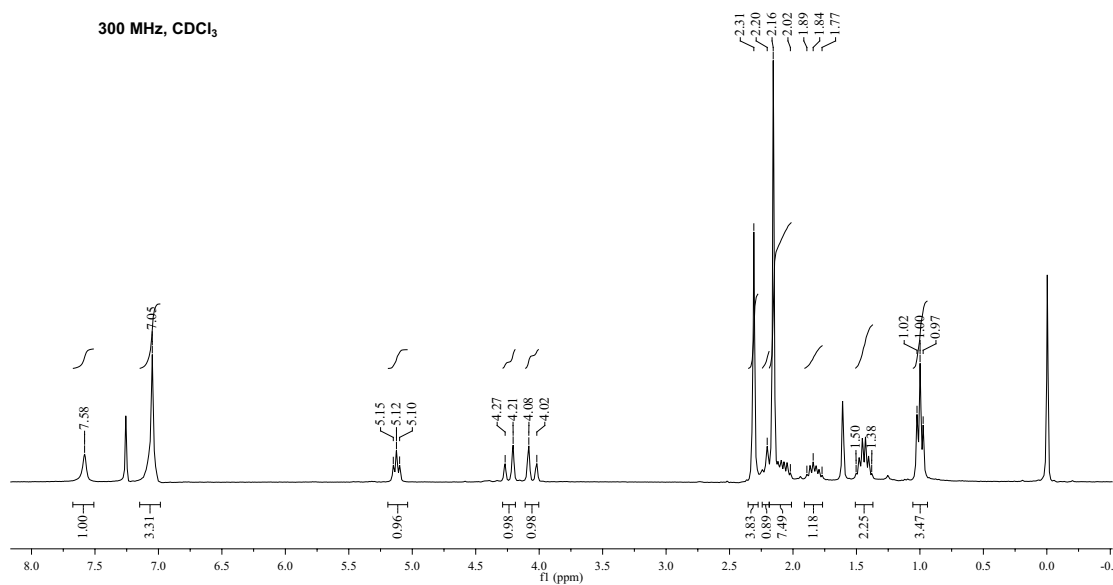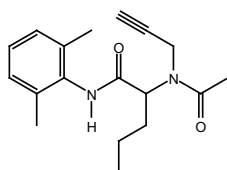75 MHz, CDCl<sub>3</sub>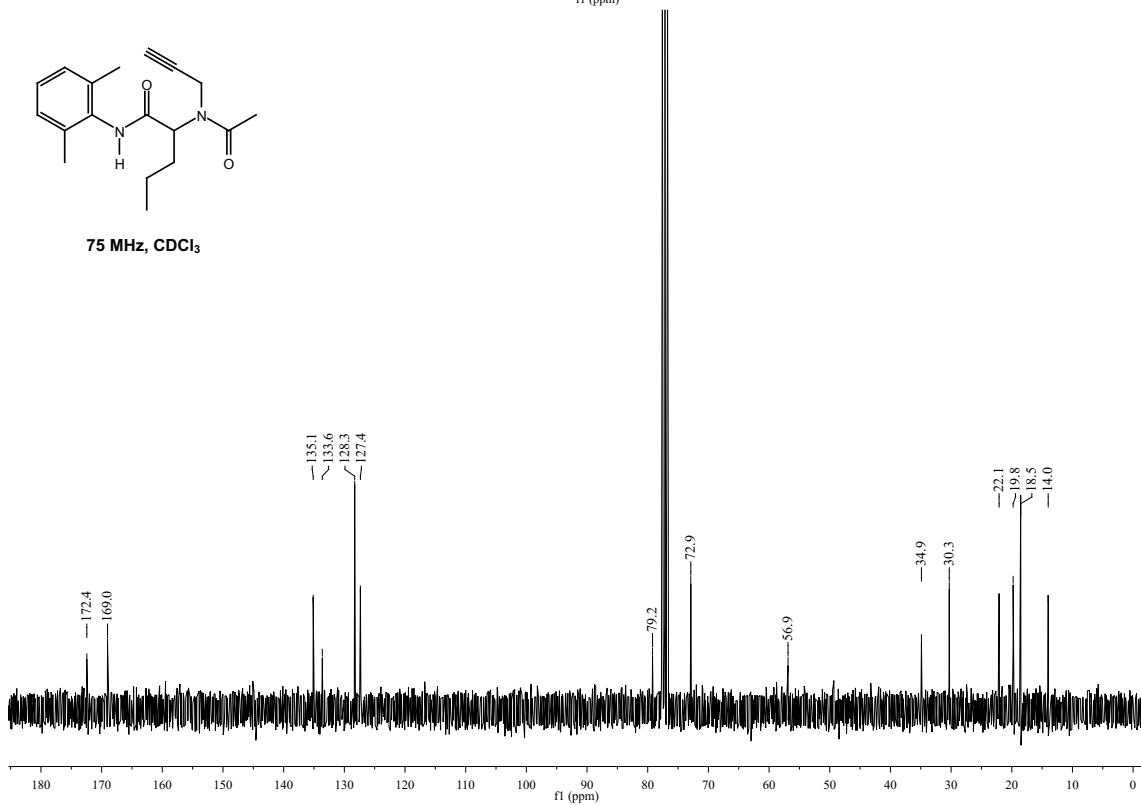

***N*-(2,6-dimethylphenyl)-3-methyl-2-(*N*-(prop-2-yn-1-yl)acetamido)butanamide (11b).**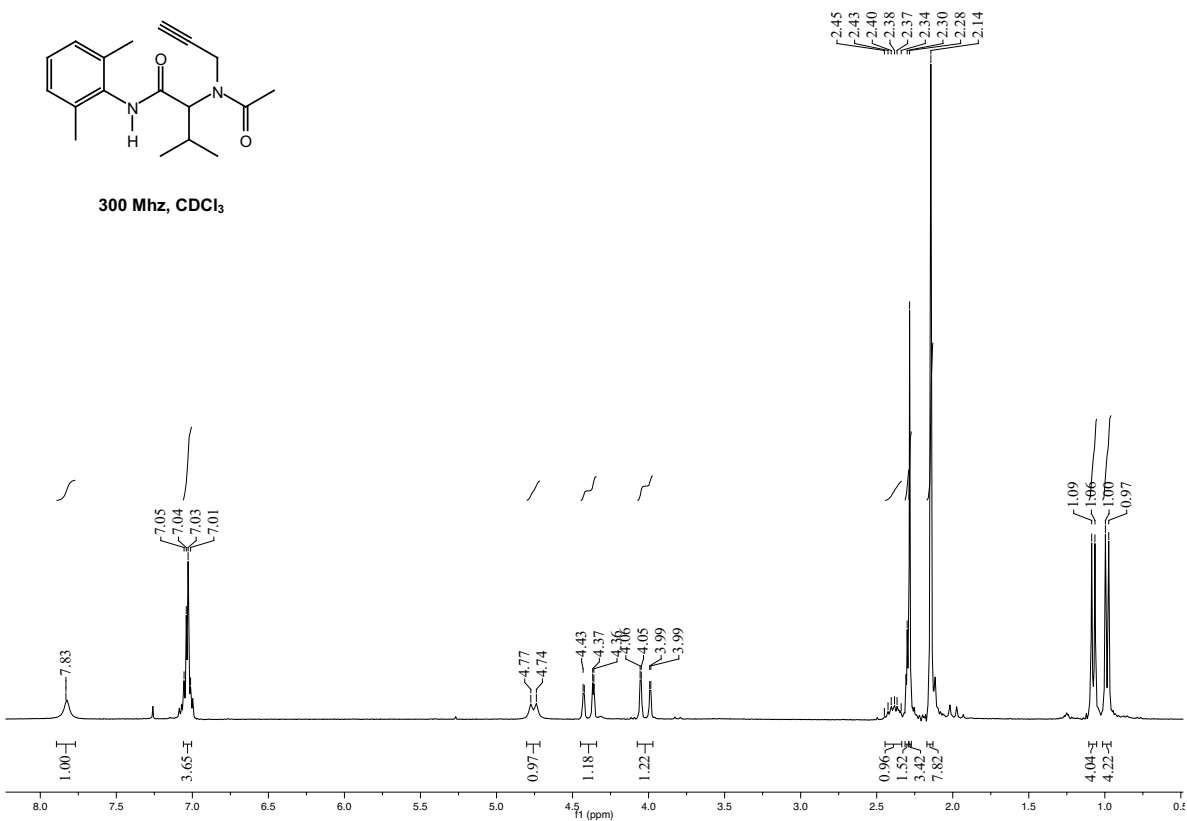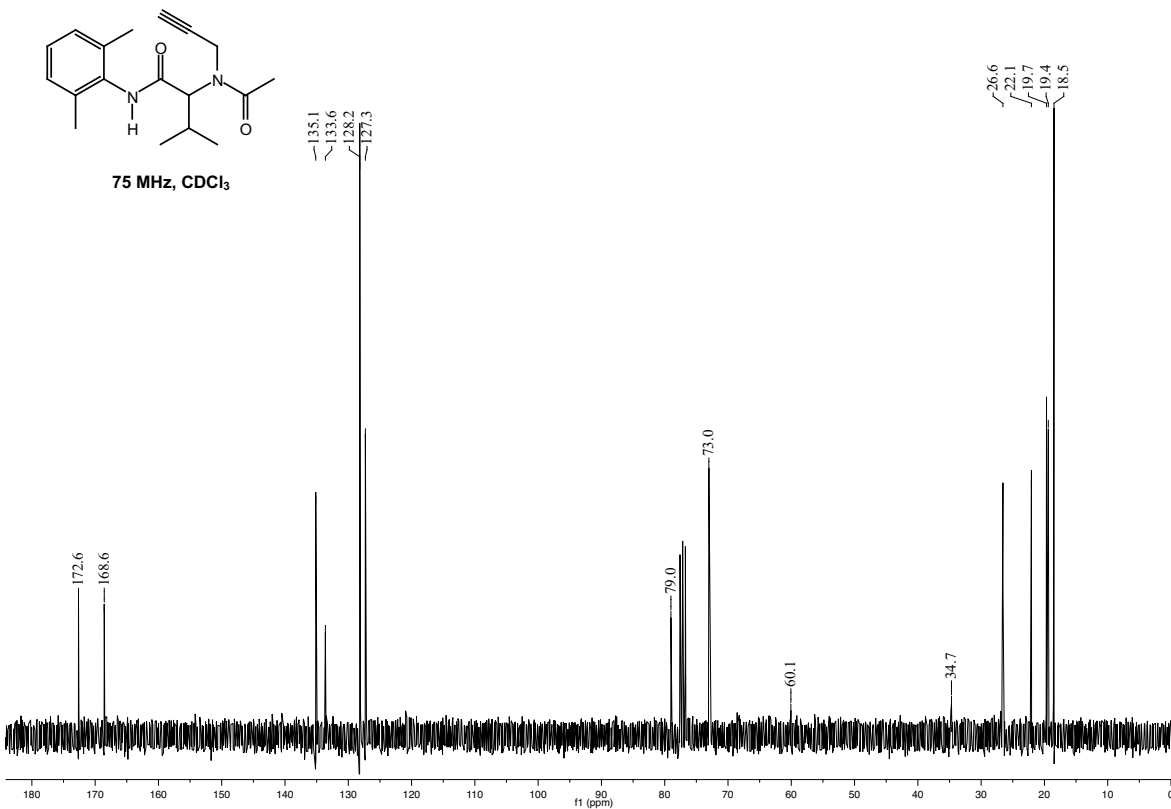

***N*-(2,6-dimethylphenyl)-2-(*N*-(prop-2-yn-1-yl)acetamido)hexanamide (11c)**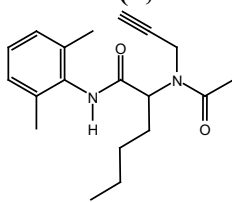300 MHz, CDCl<sub>3</sub>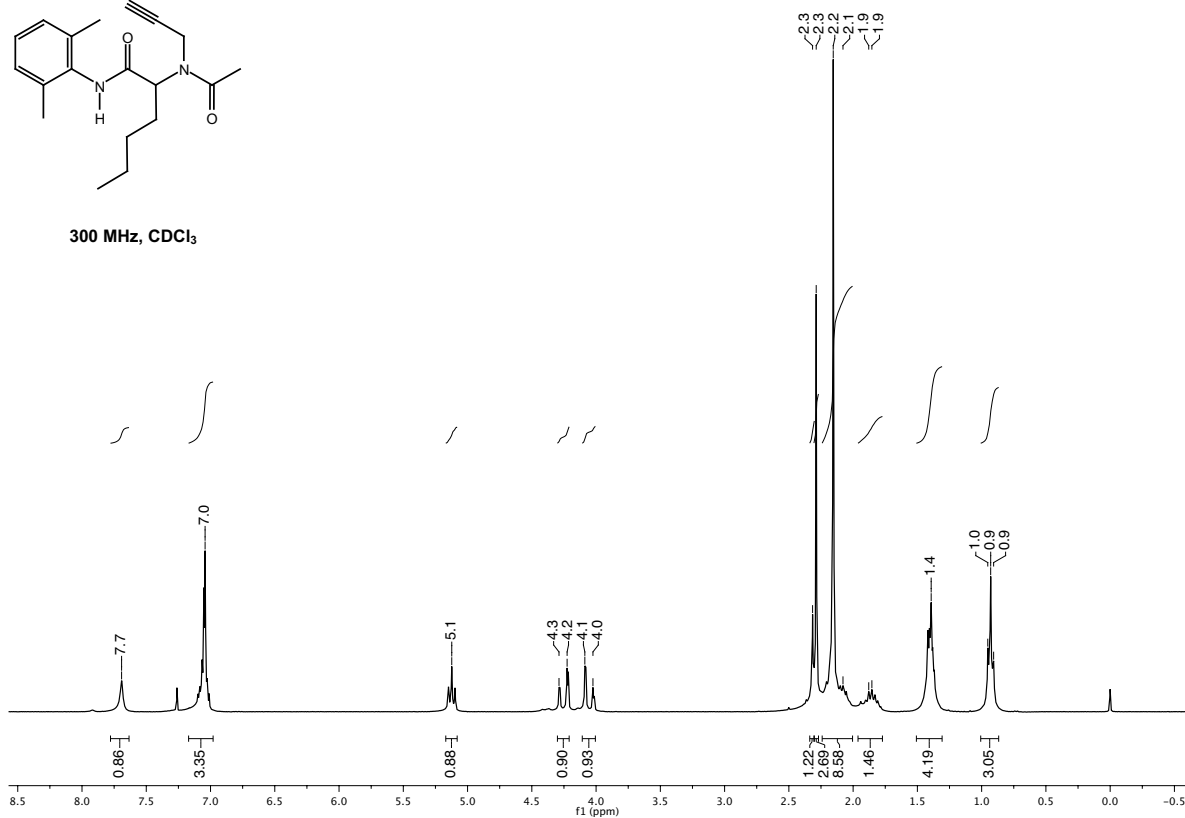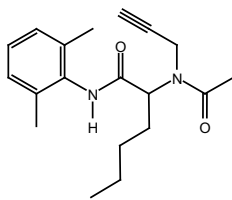75 MHz, CDCl<sub>3</sub>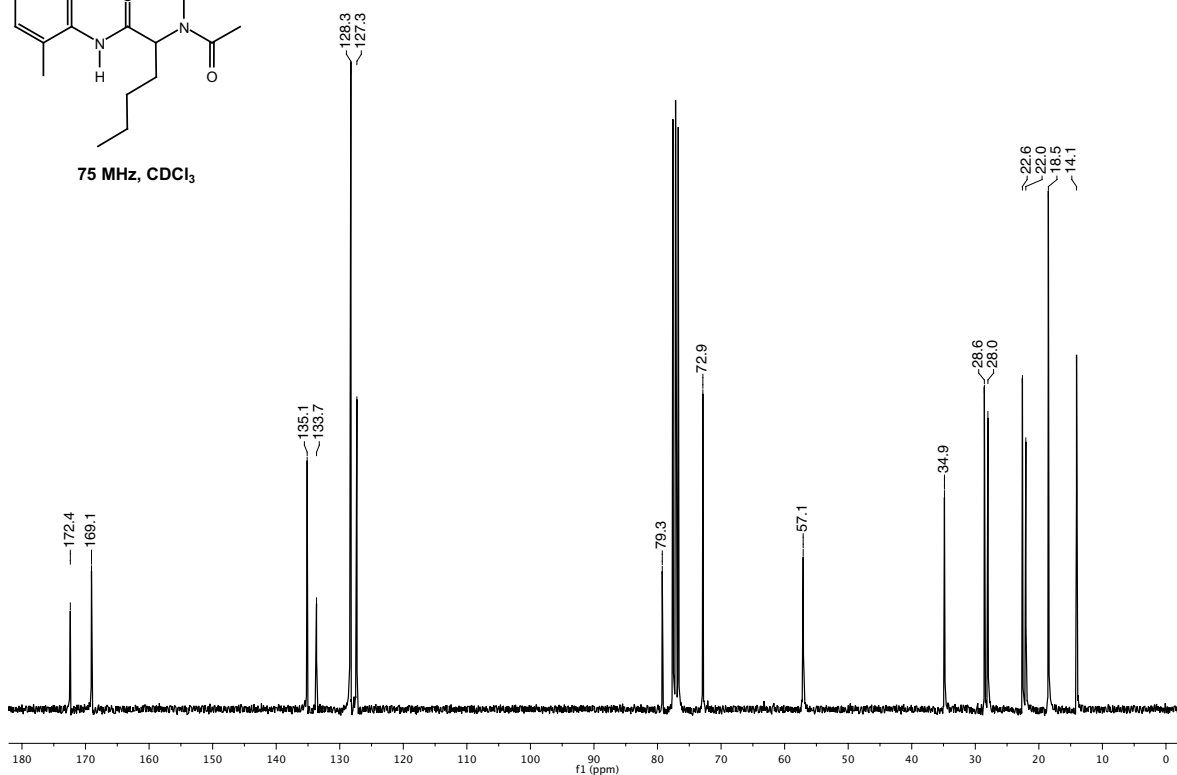

***N*-(2,6-dimethylphenyl)-2-(*N*-(prop-2-yn-1-yl)acetamido)butanamide (11d)**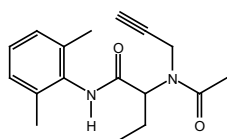300 MHz, CDCl<sub>3</sub>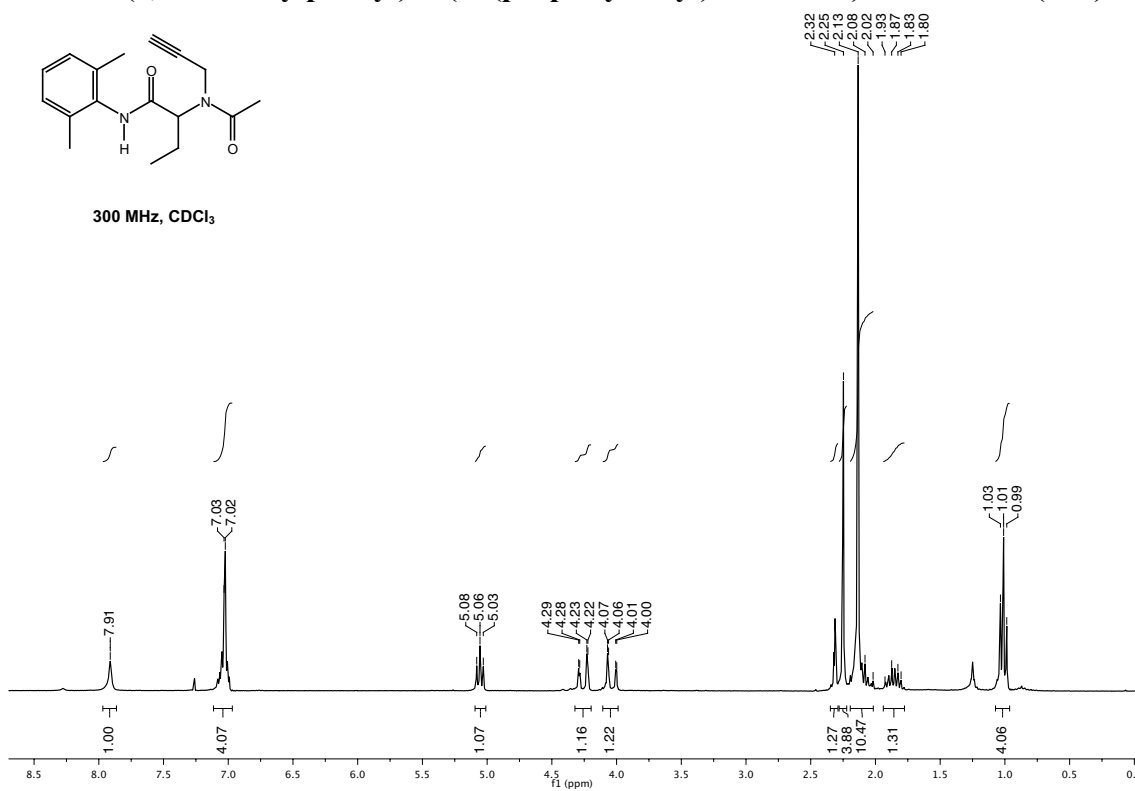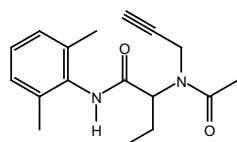75 MHz, CDCl<sub>3</sub>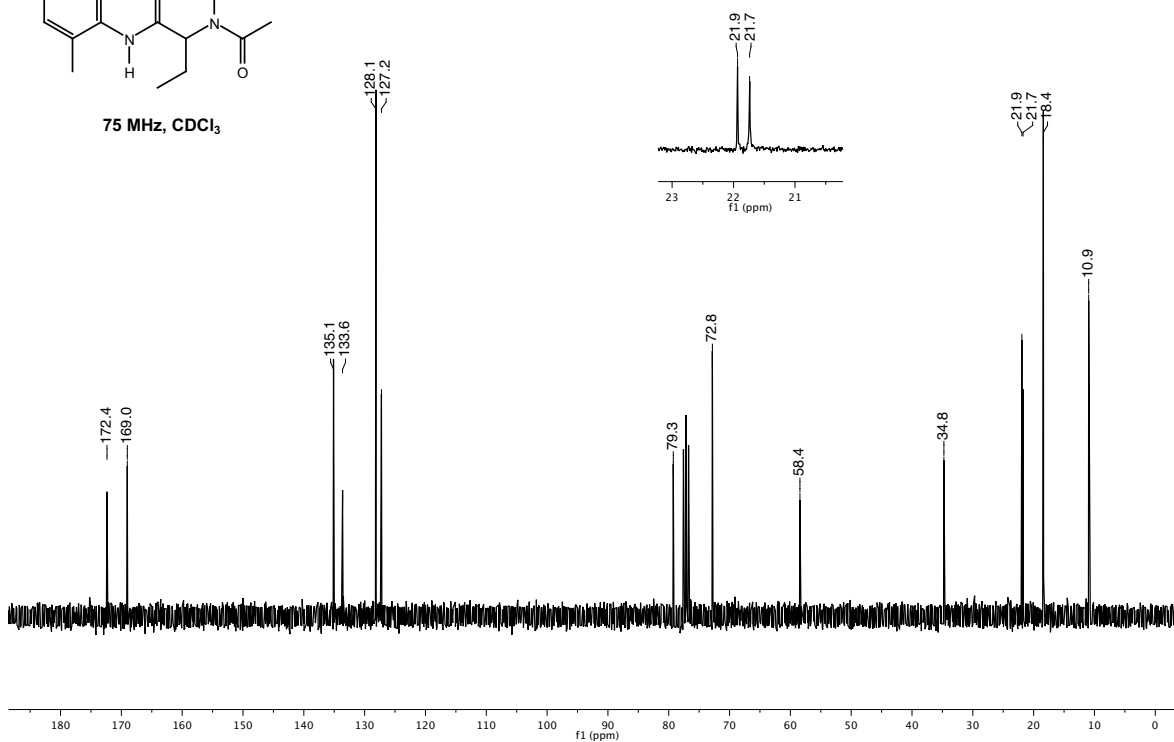

***N*-(2,6-dimethylphenyl)-2-(*N*-(prop-2-yn-1-yl)acetamido)acetamide (11e)**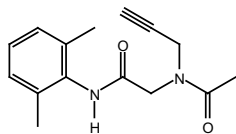300 MHz, CDCl<sub>3</sub>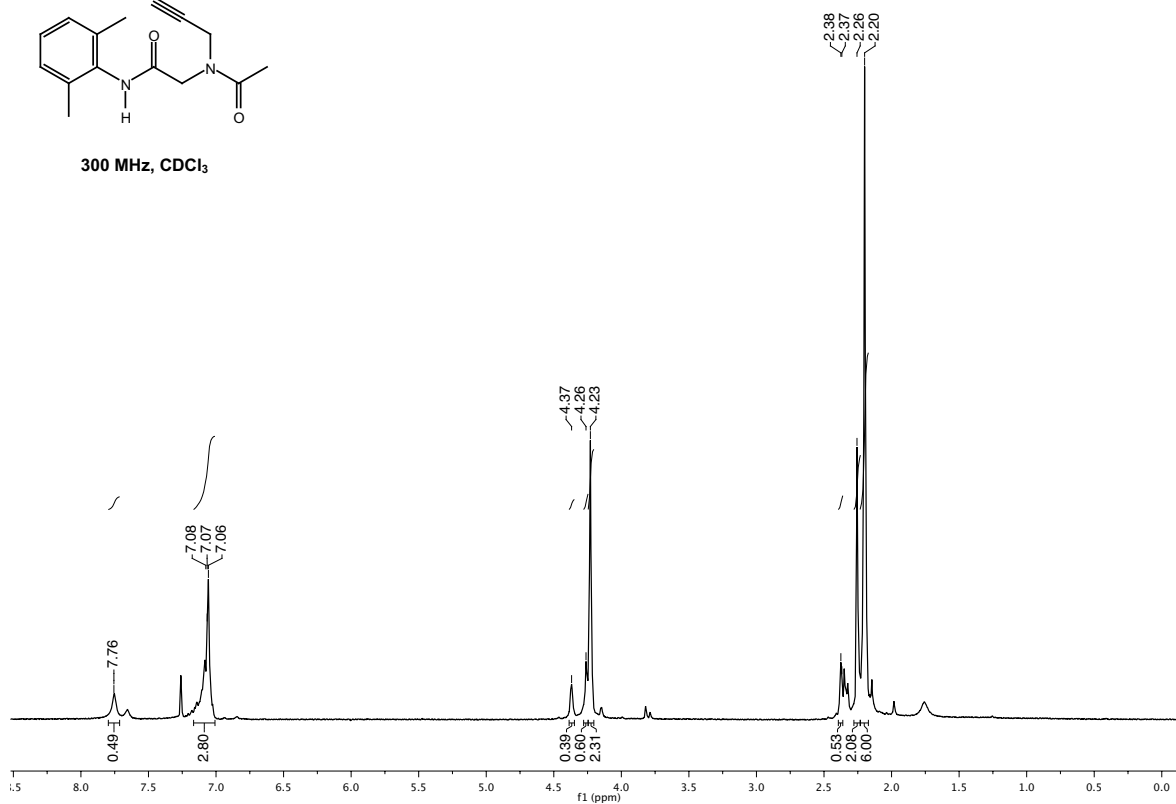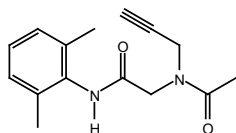75 MHz, CDCl<sub>3</sub>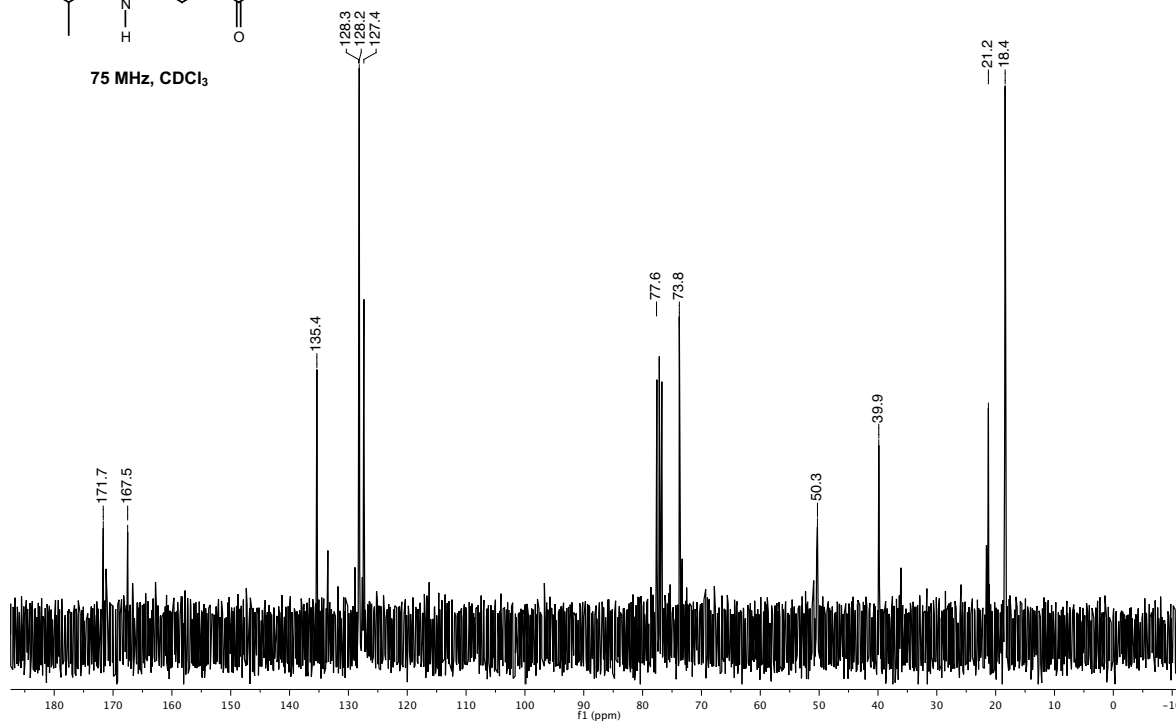

***N*-(2,6-dimethylphenyl)-4-phenyl-2-(*N*-(prop-2-yn-1-yl)acetamido)butanamide (11f)**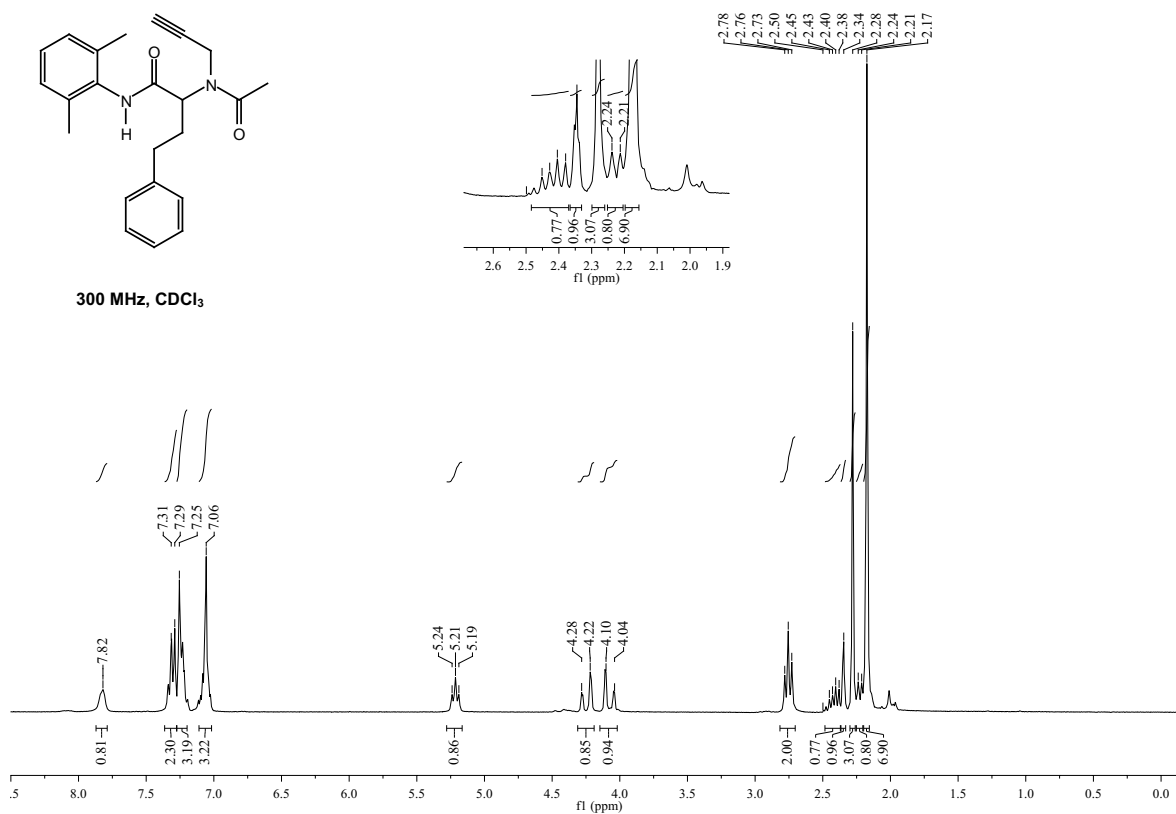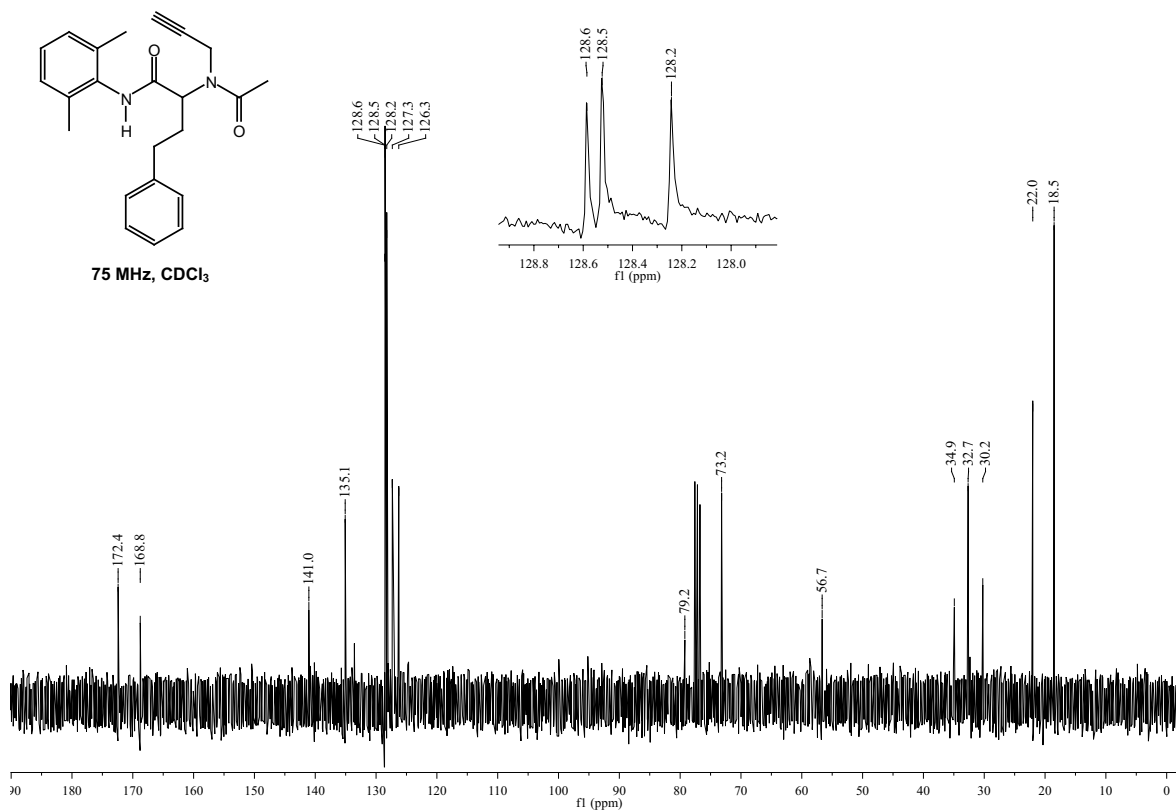

***N*-(1-((2,6-dimethylphenyl)amino)-1-oxohexan-2-yl)-*N*-(prop-2-yn-1-yl)benzamide (11g)**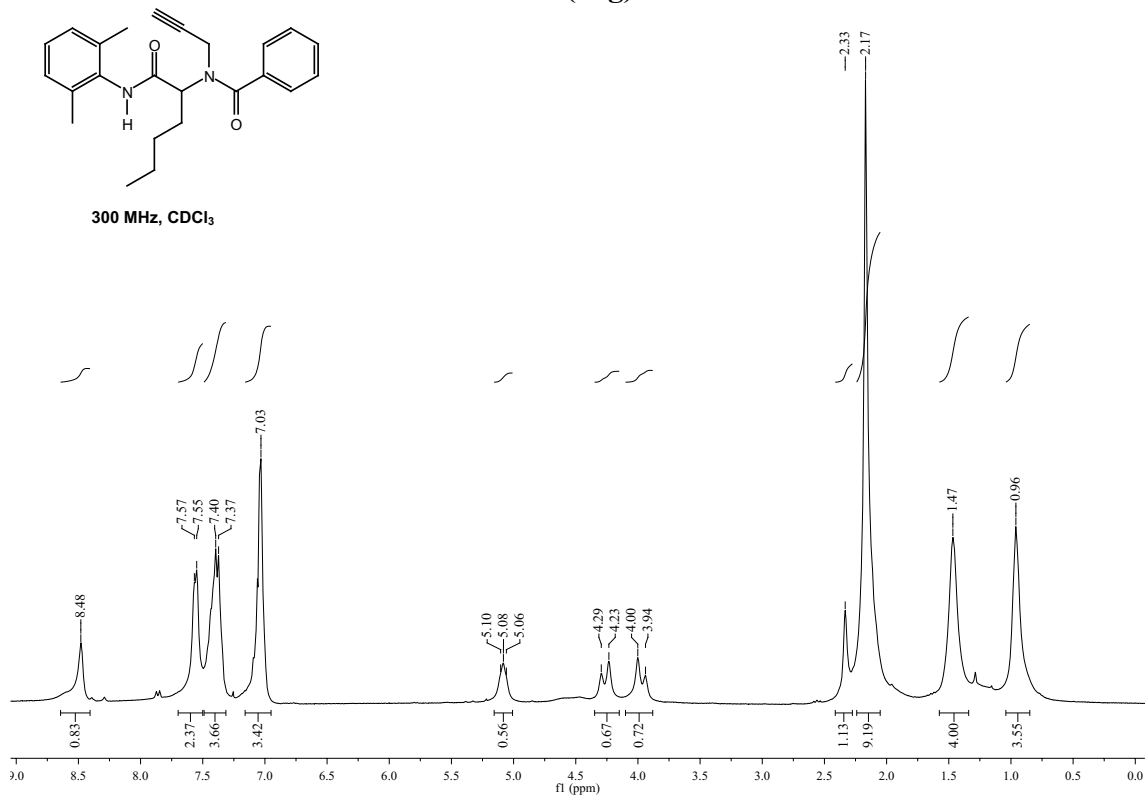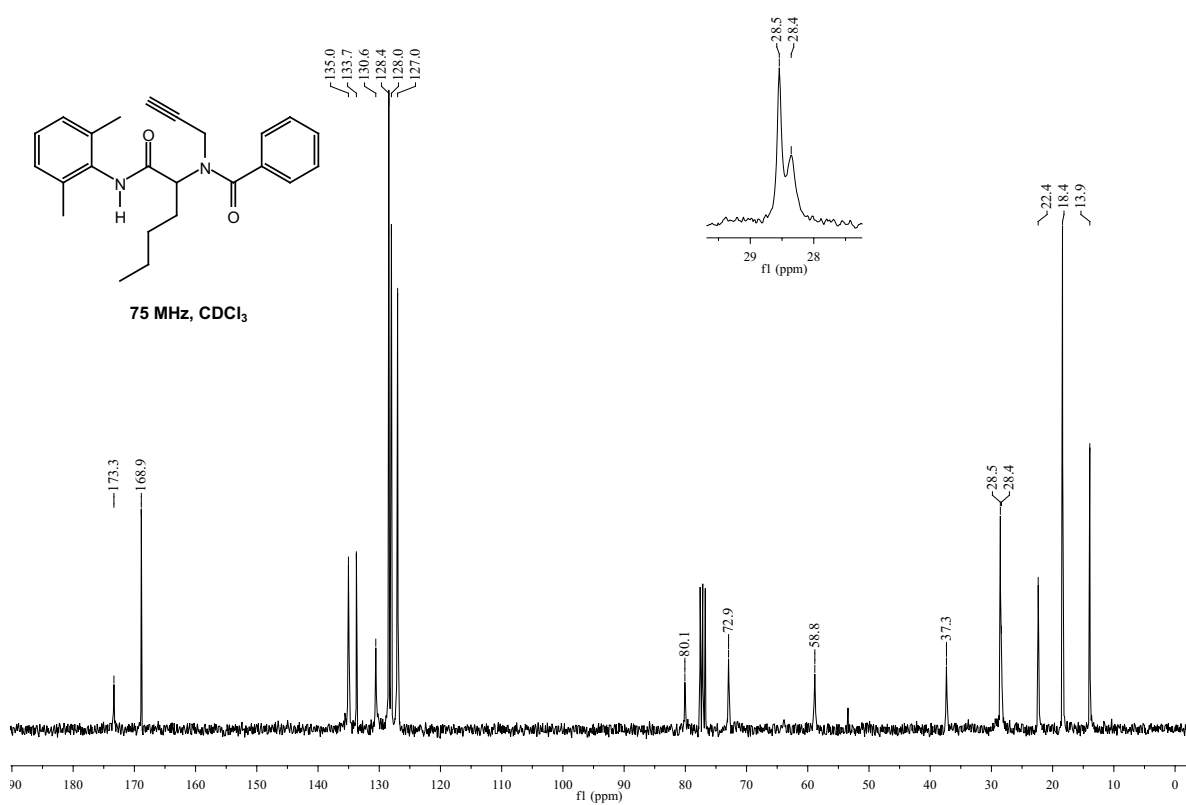



***N*-(1-((2,6-dimethylphenyl)amino)-3-methyl-1-oxobutan-2-yl)-*N*-(prop-2-yn-1-yl)benzamide (11h)**

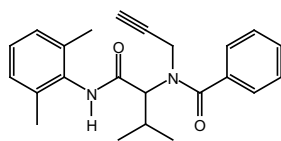

300 MHz, CDCl<sub>3</sub>

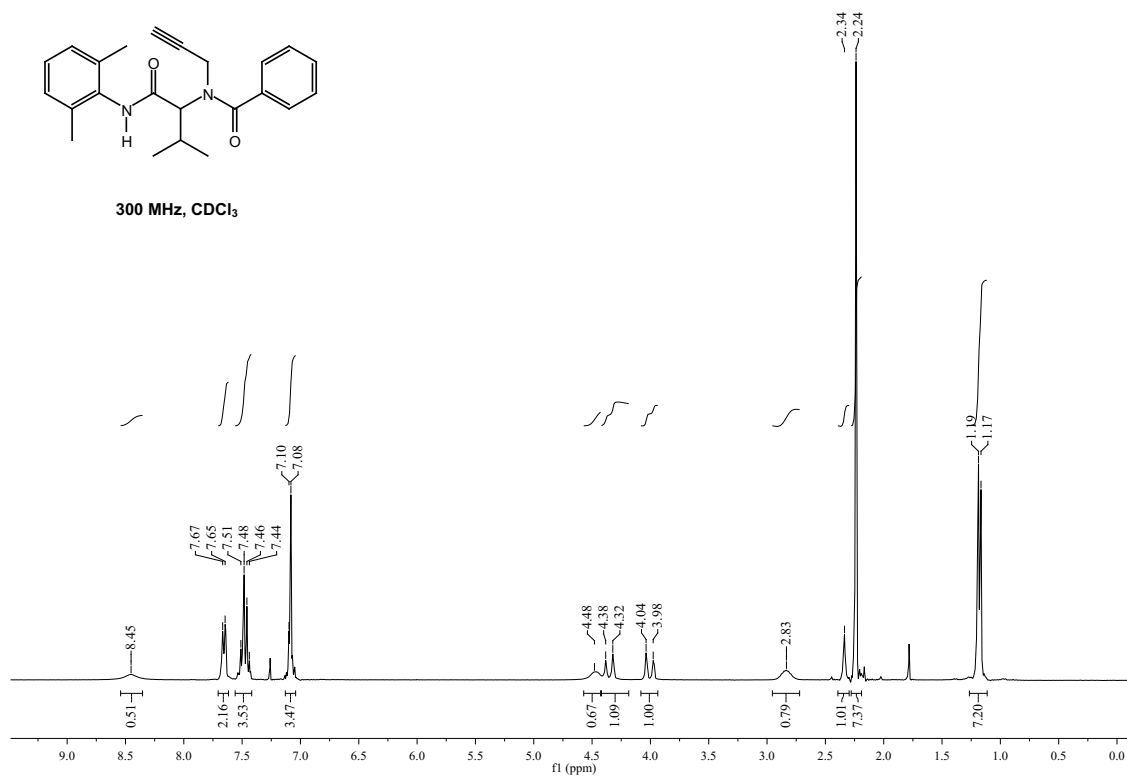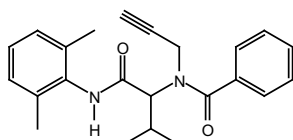

75 MHz, CDCl<sub>3</sub>

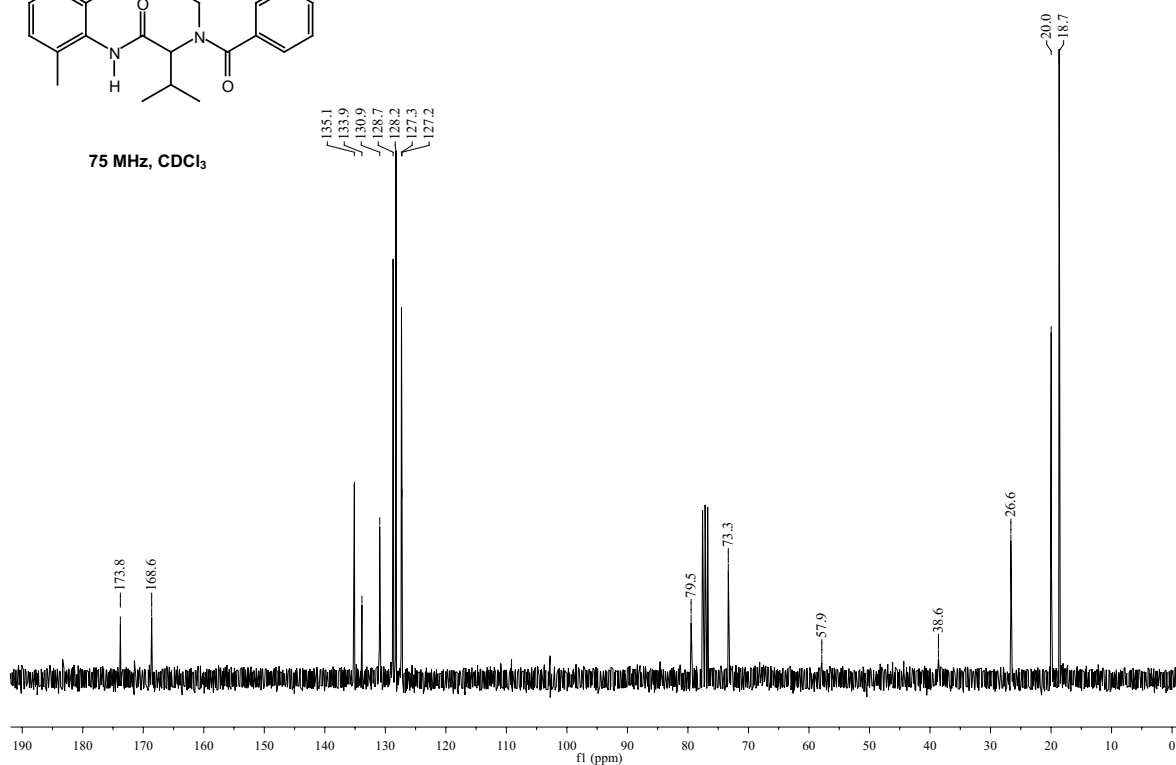

***N*-((2,6-dimethylphenyl)amino)-1-oxobutan-2-yl)-*N*-(prop-2-yn-1-yl)benzamide  
(11i)**

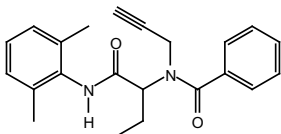

300 MHz, CDCl<sub>3</sub>

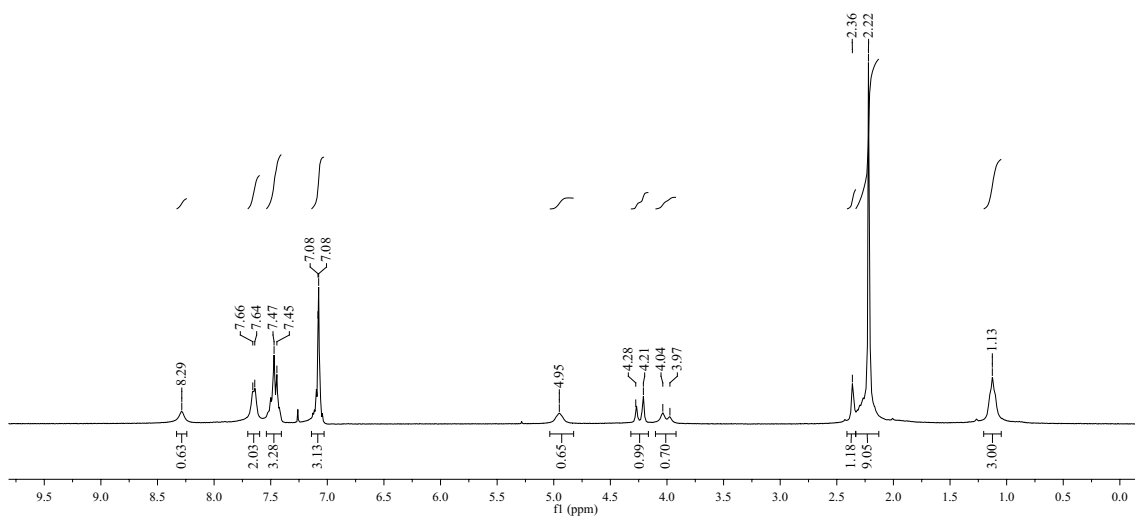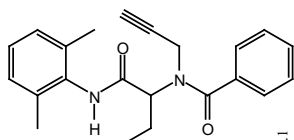

75 MHz, CDCl<sub>3</sub>

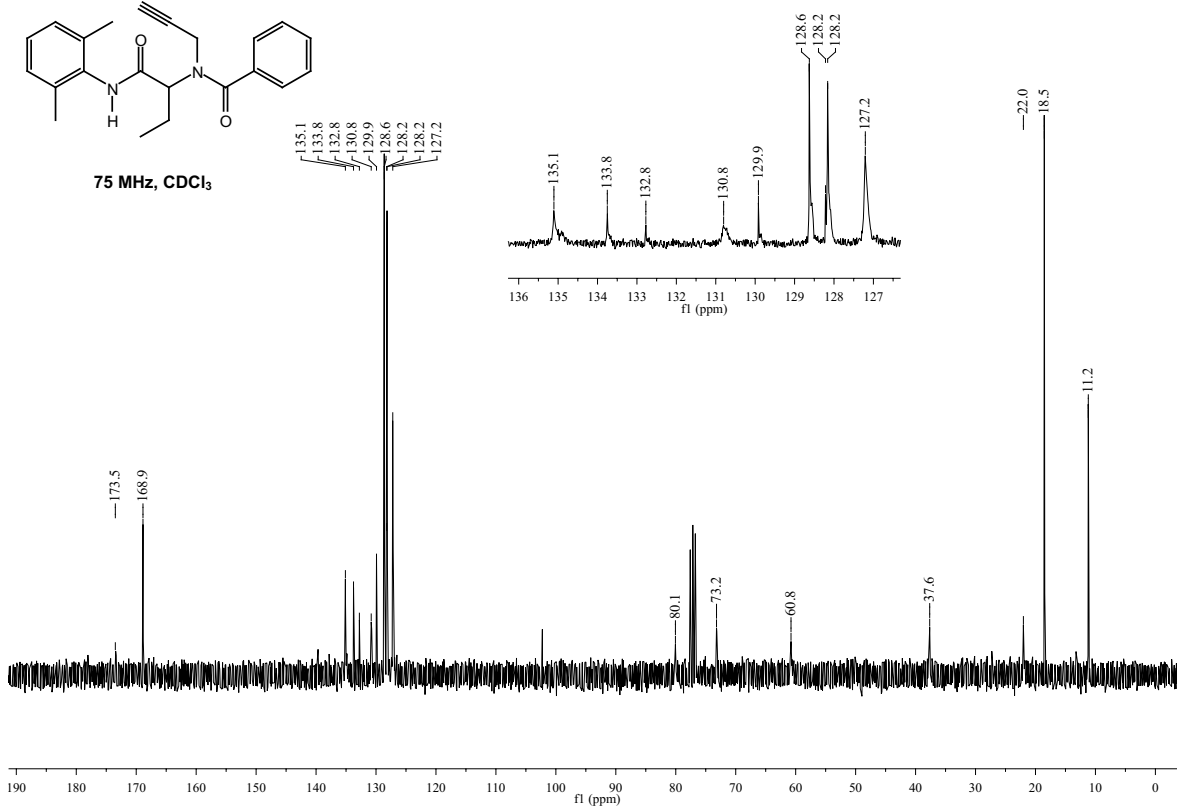

***N*-cyclohexyl-2-(*N*-(prop-2-yn-1-yl)acetamido)butanamide (11j)**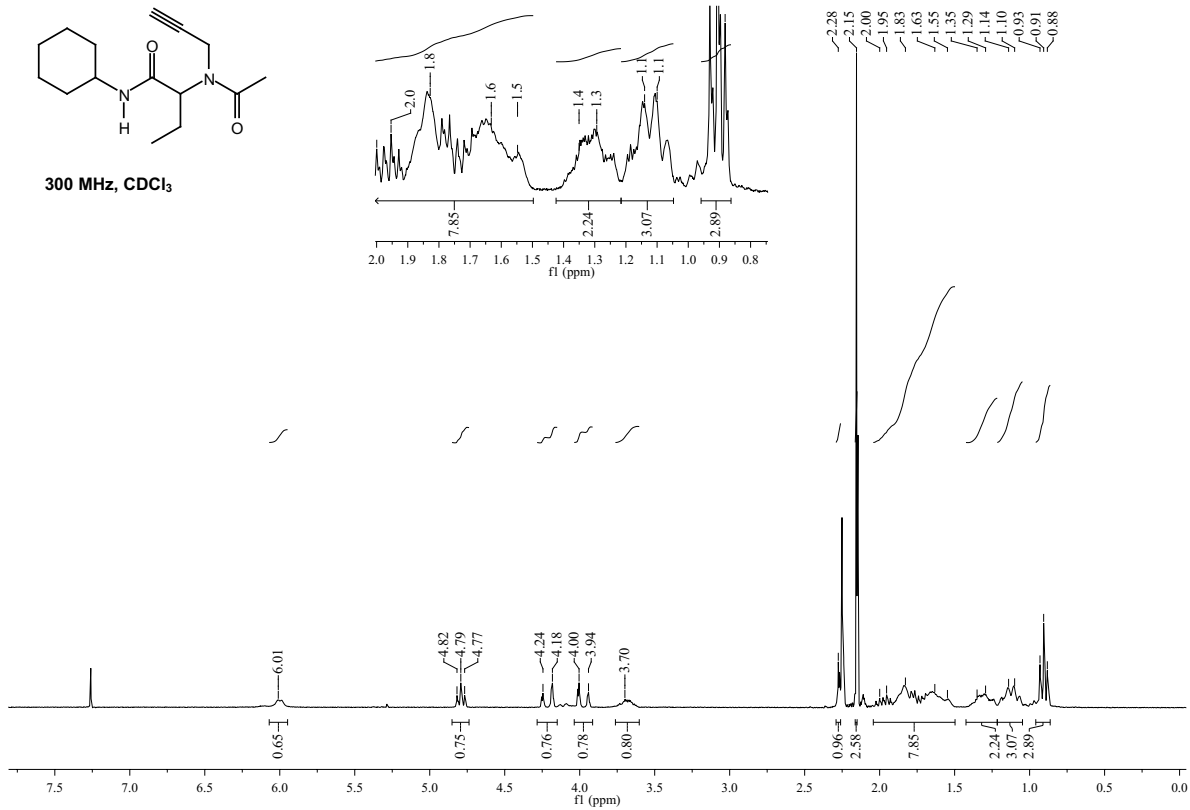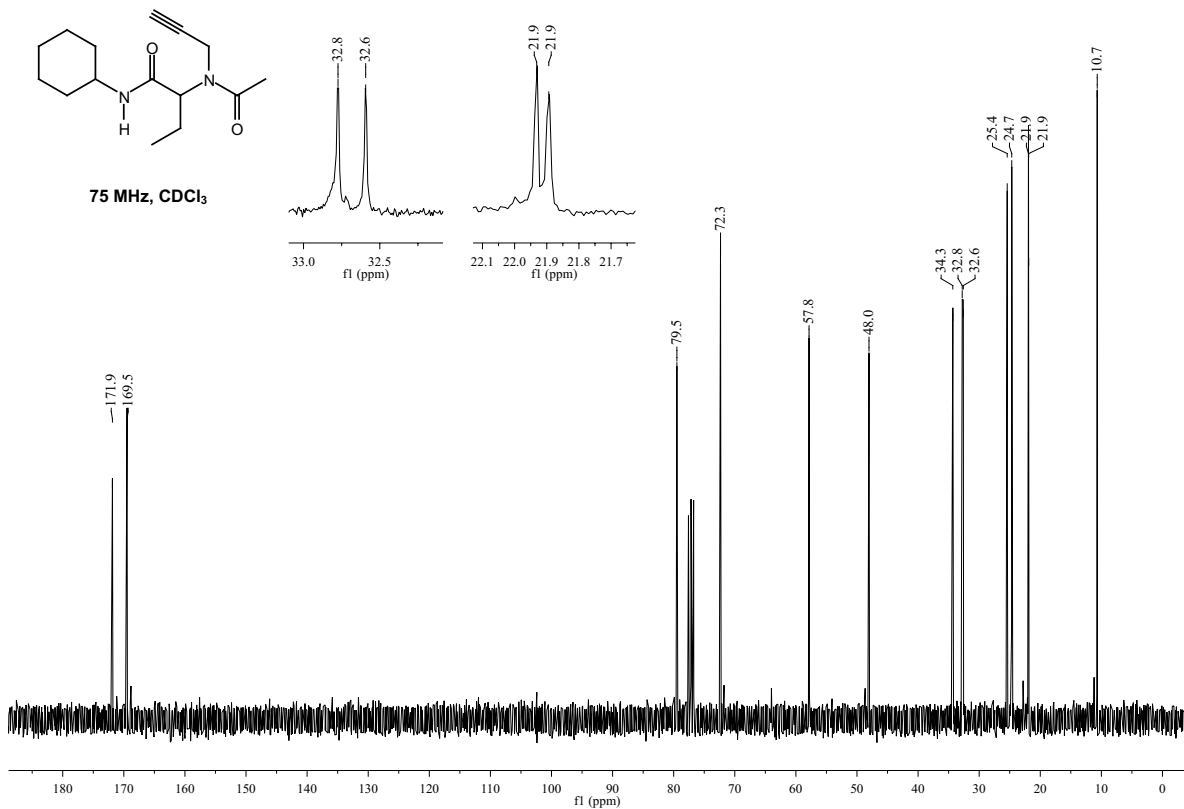

***N*-cyclohexyl-2-(*N*-(prop-2-yn-1-yl)acetamido)pentanamide (11k).**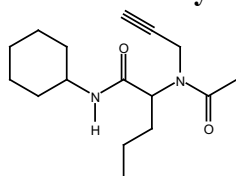300 MHz, CDCl<sub>3</sub>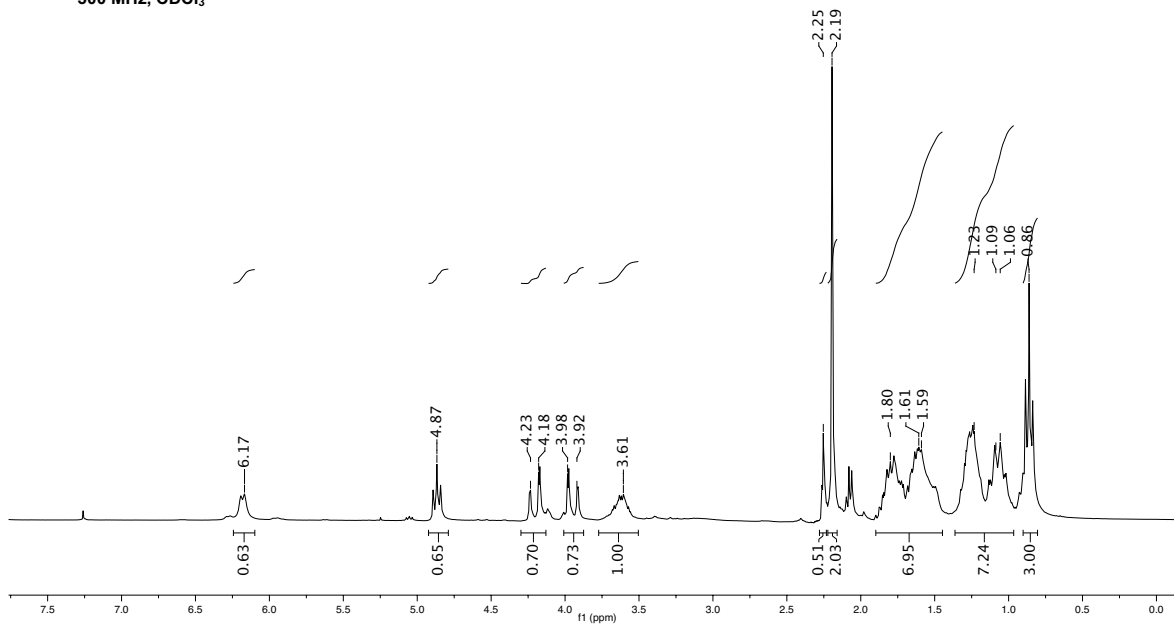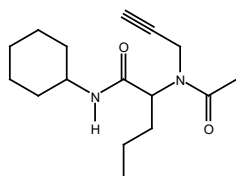75 MHz, CDCl<sub>3</sub>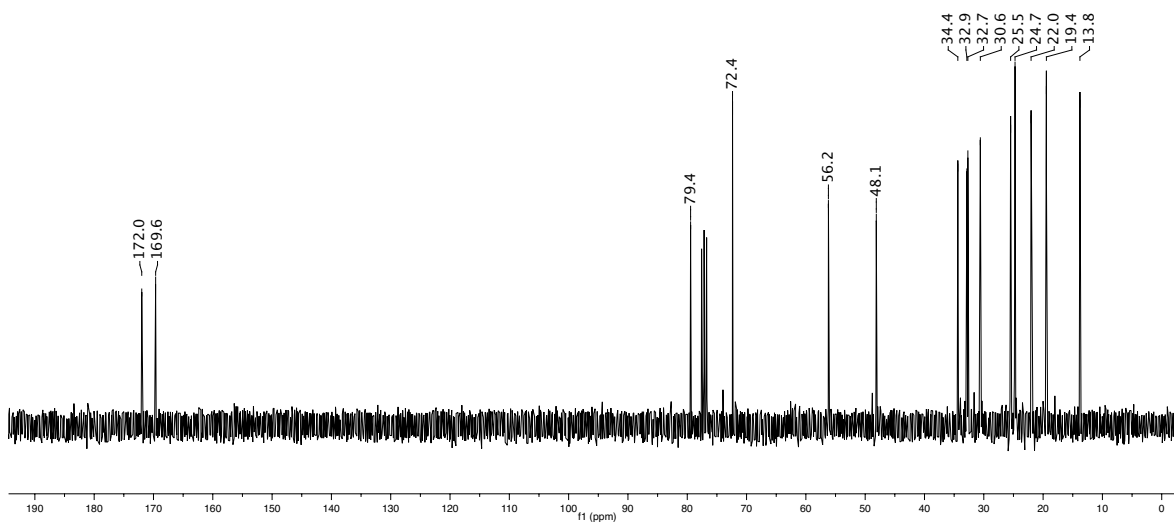

**N-cyclohexyl-3-methyl-2-(N-(prop-2-yn-1-yl)acetamido)butanamide (11l)**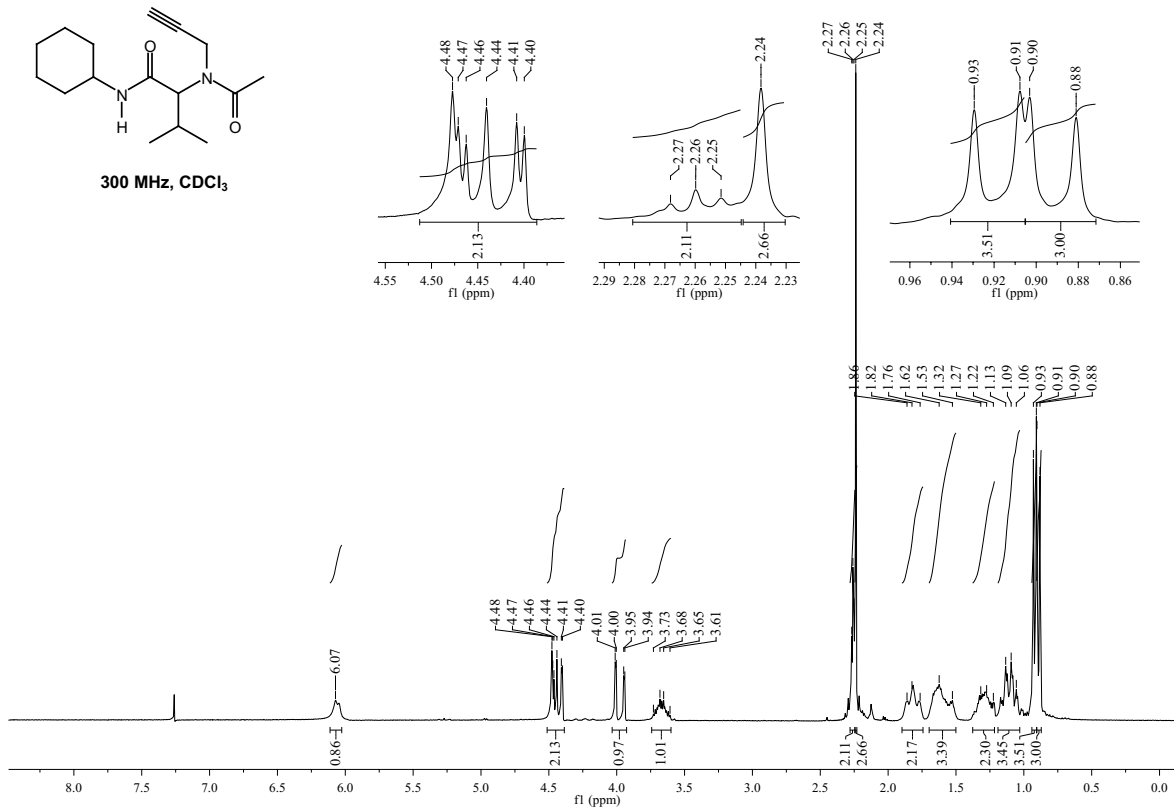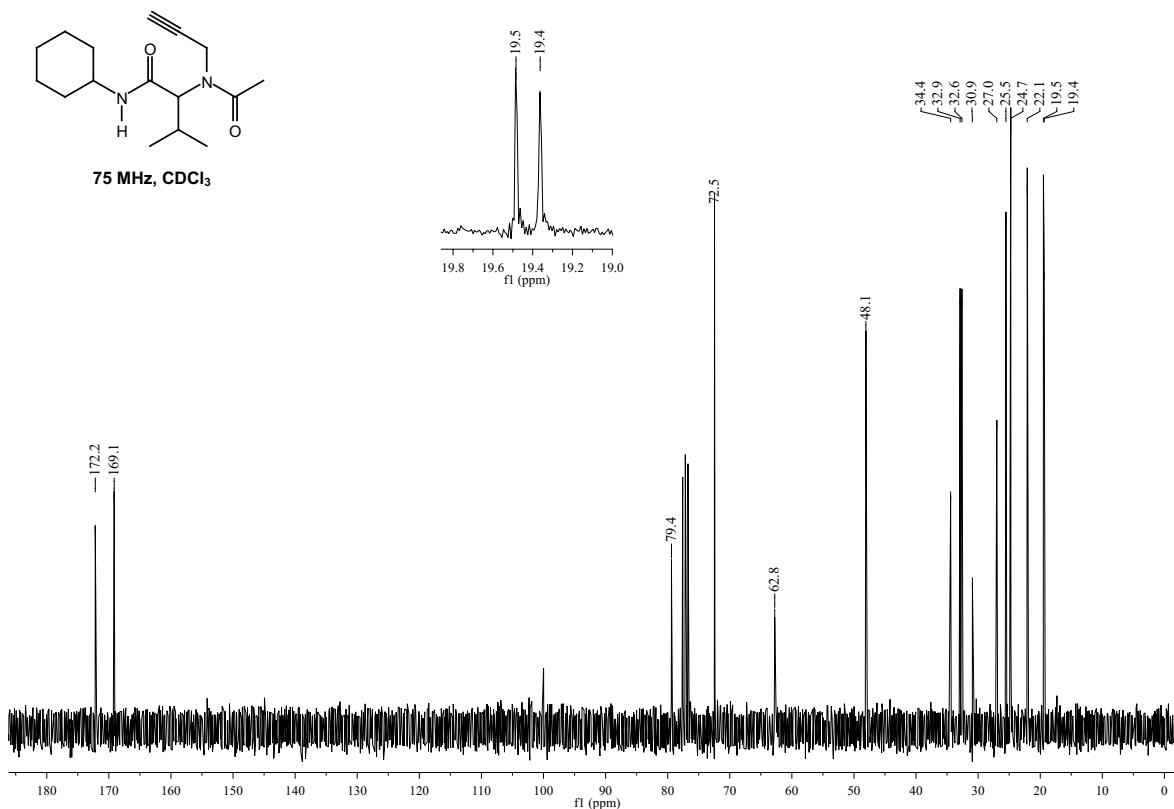

***N*-cyclohexyl-2-(*N*-(prop-2-yn-1-yl)acetamido)hexanamide (11m)**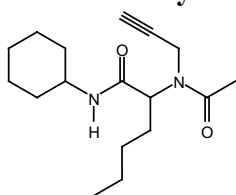300 MHz, CDCl<sub>3</sub>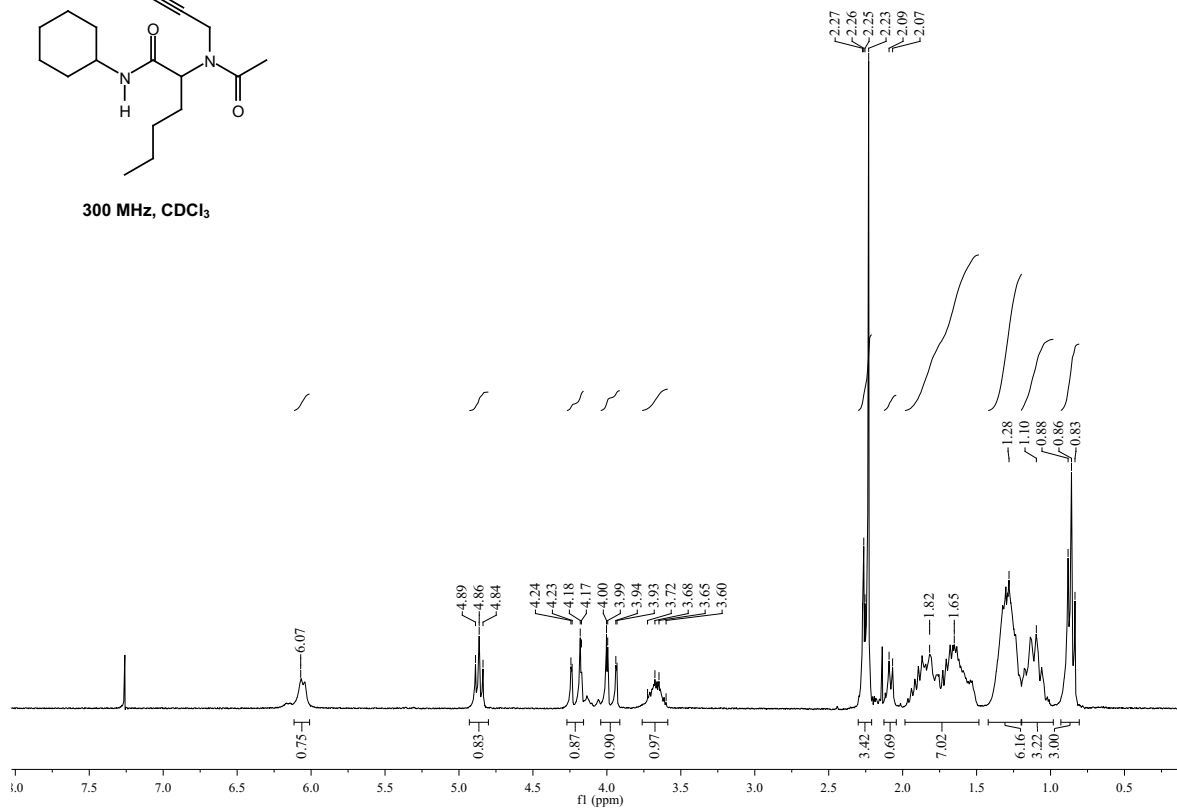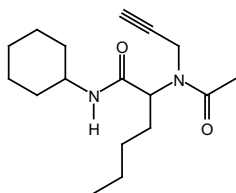75 MHz, CDCl<sub>3</sub>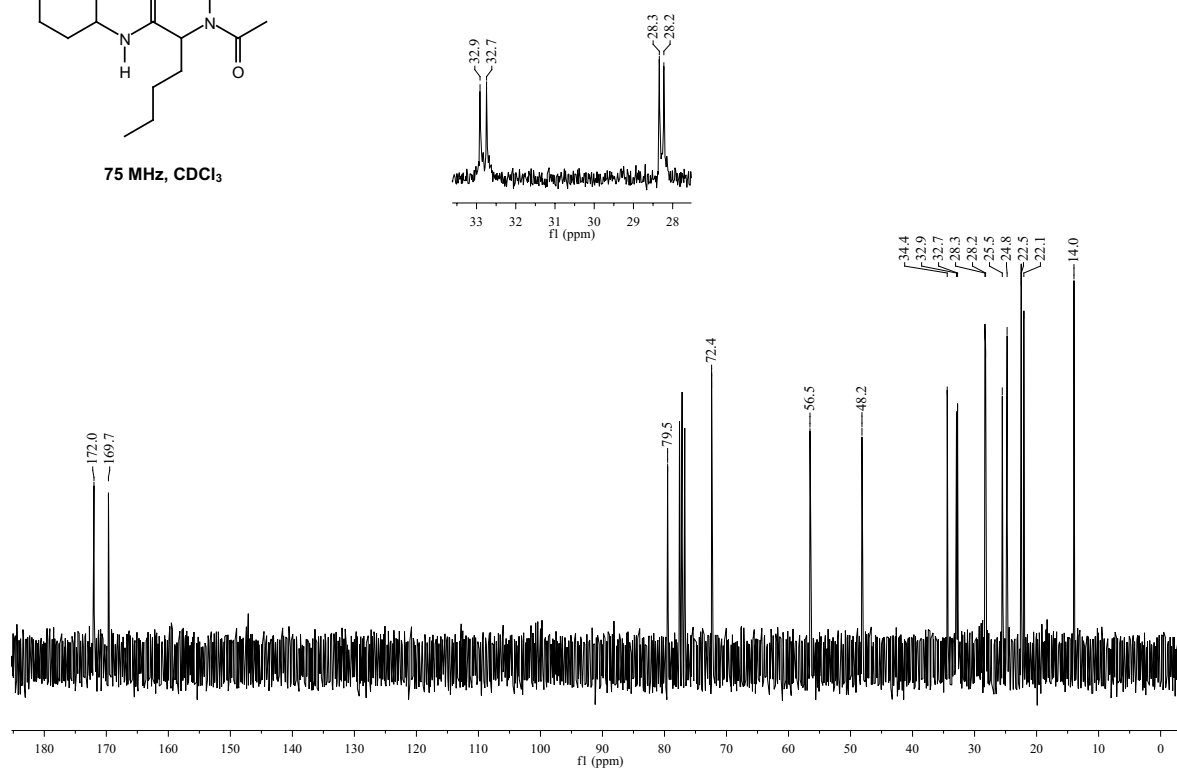

***N*-(1-(cyclohexylamino)-1-oxobutan-2-yl)-*N*-(prop-2-yn-1-yl)benzamide (11n)**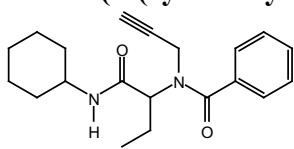300 MHz, CDCl<sub>3</sub>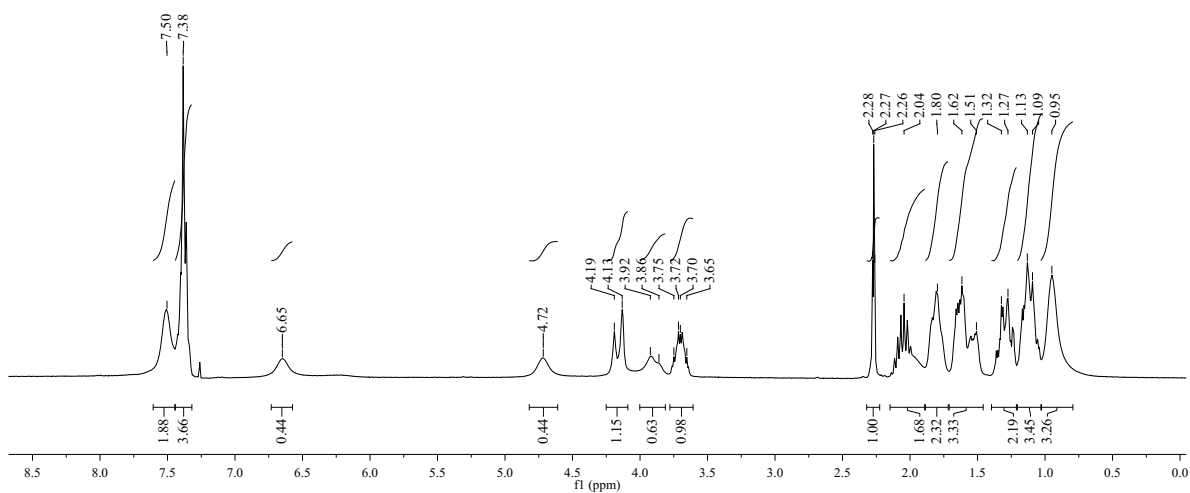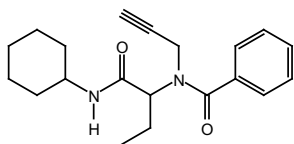75 MHz, CDCl<sub>3</sub>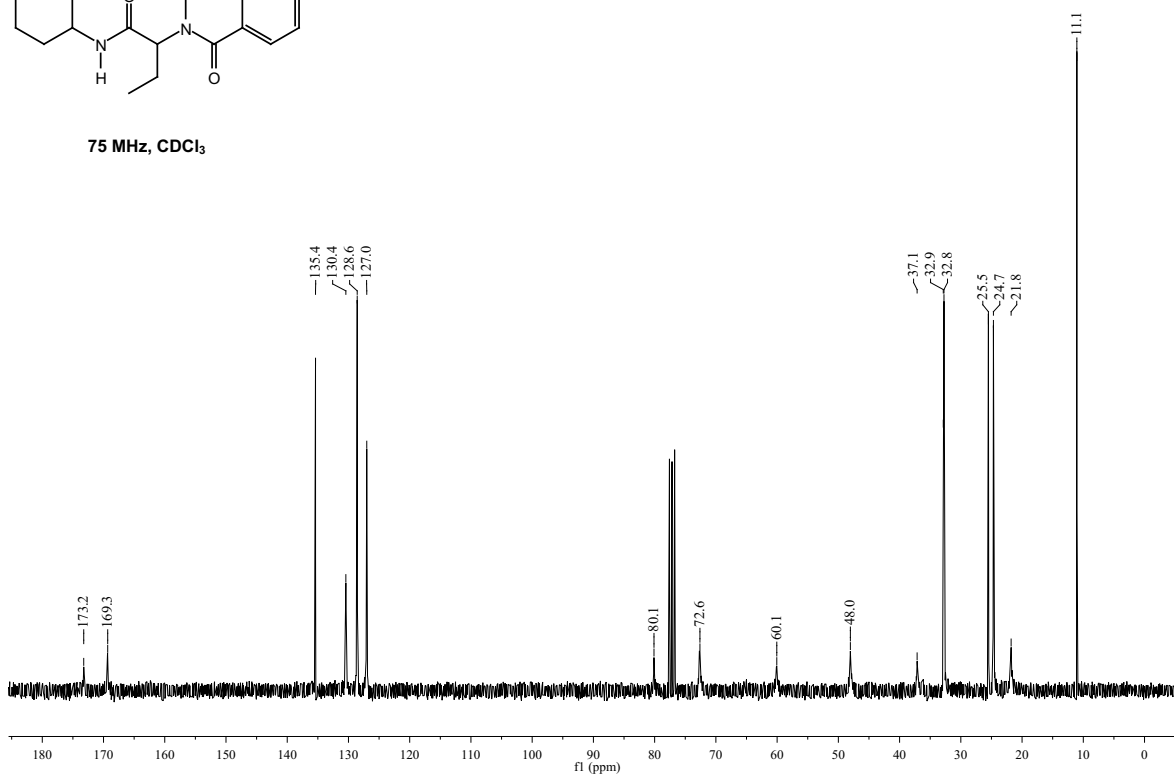

***N*-(1-(cyclohexylamino)-1-oxopentan-2-yl)-*N*-(prop-2-yn-1-yl)benzamide (11o)**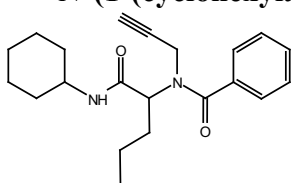300 MHz, CDCl<sub>3</sub>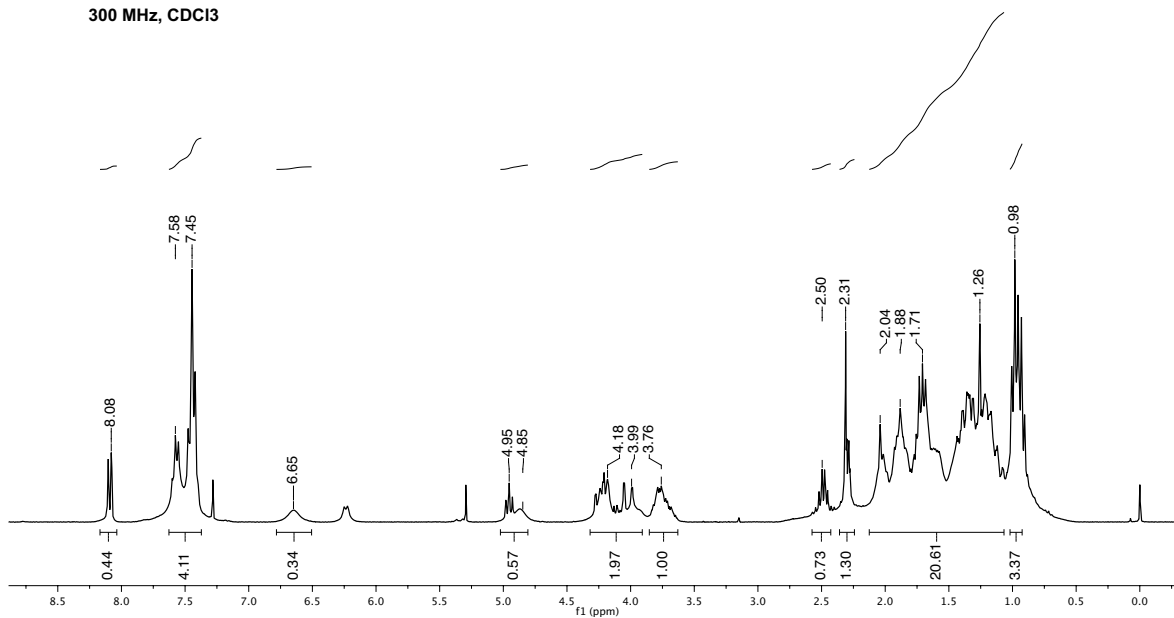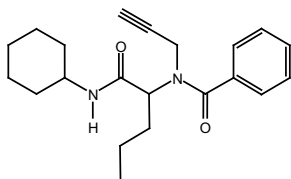75 MHz, CDCl<sub>3</sub>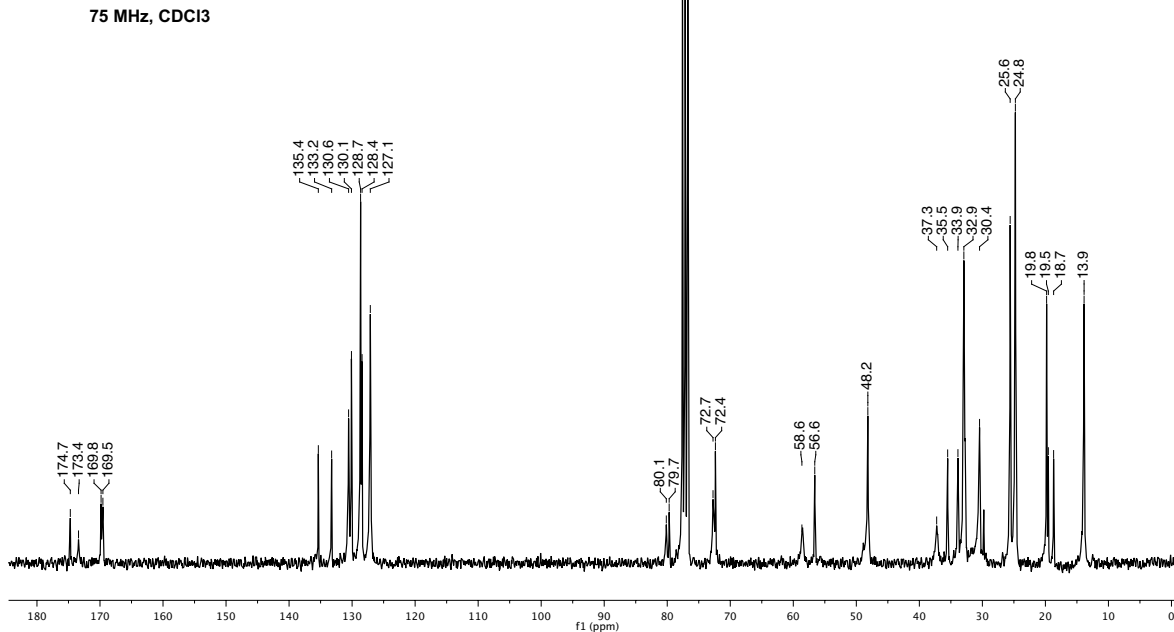



***N*-(1-((2,6-dimethylphenyl)amino)-1-oxohexan-2-yl)-2-iodo-*N*-(prop-2-yn-1-yl)benzamide (11p)**

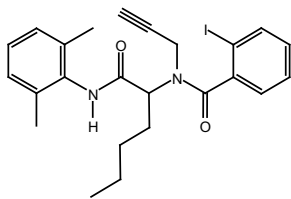

300 MHz, CDCl<sub>3</sub>

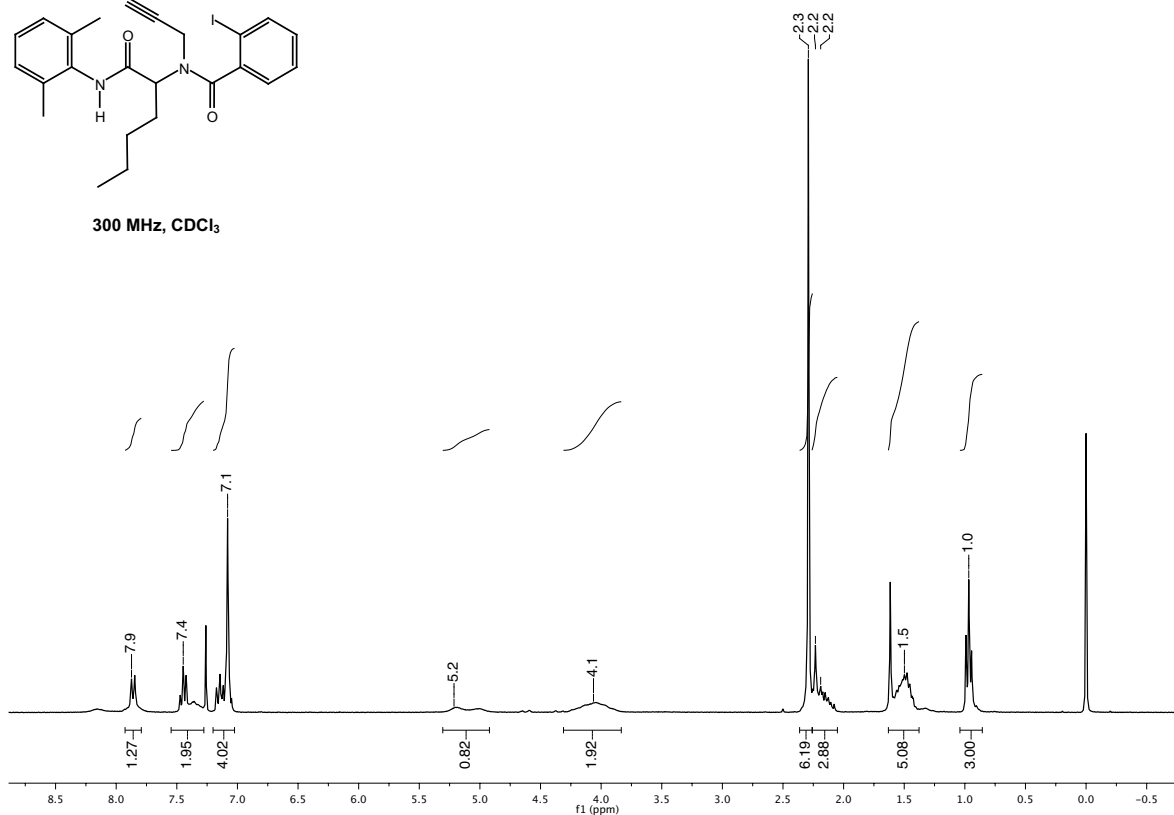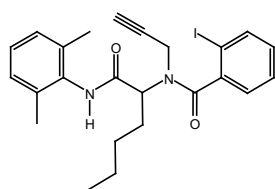

75 MHz, CDCl<sub>3</sub>

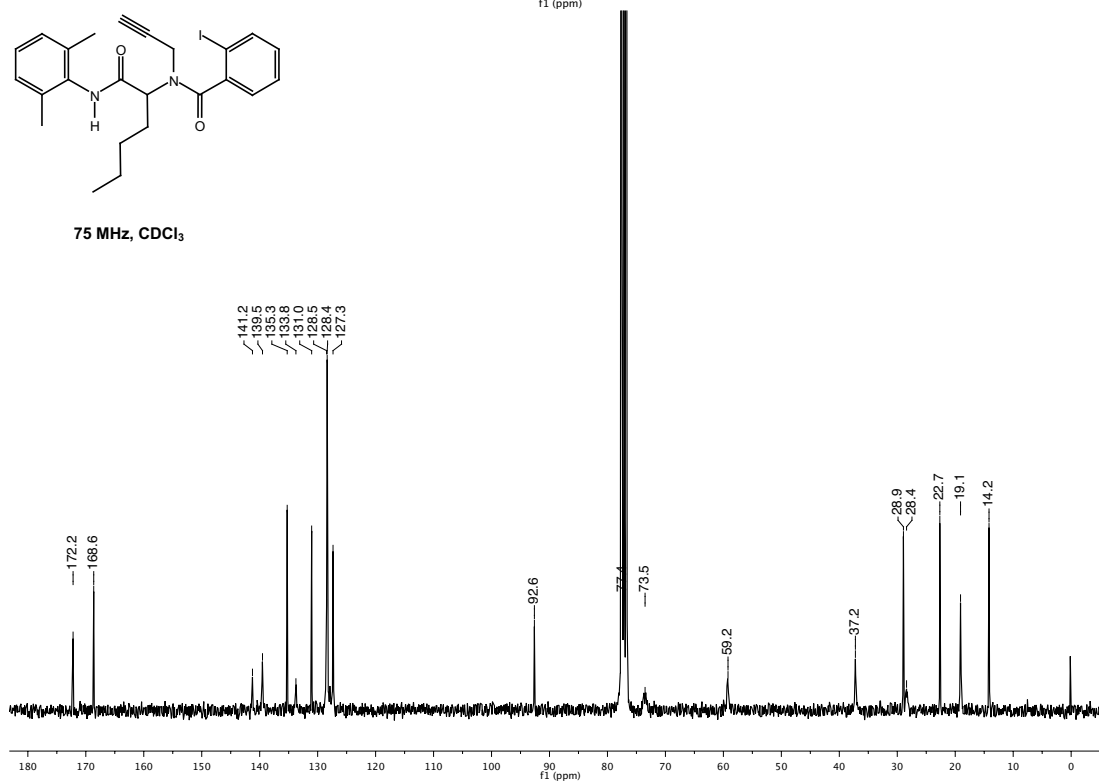

***N*-1-((2,6-dimethylphenyl)amino)-1-oxobutan-2-yl)-2-iodo-*N*-(prop-2-yn-1-yl)-benzamide (11q)**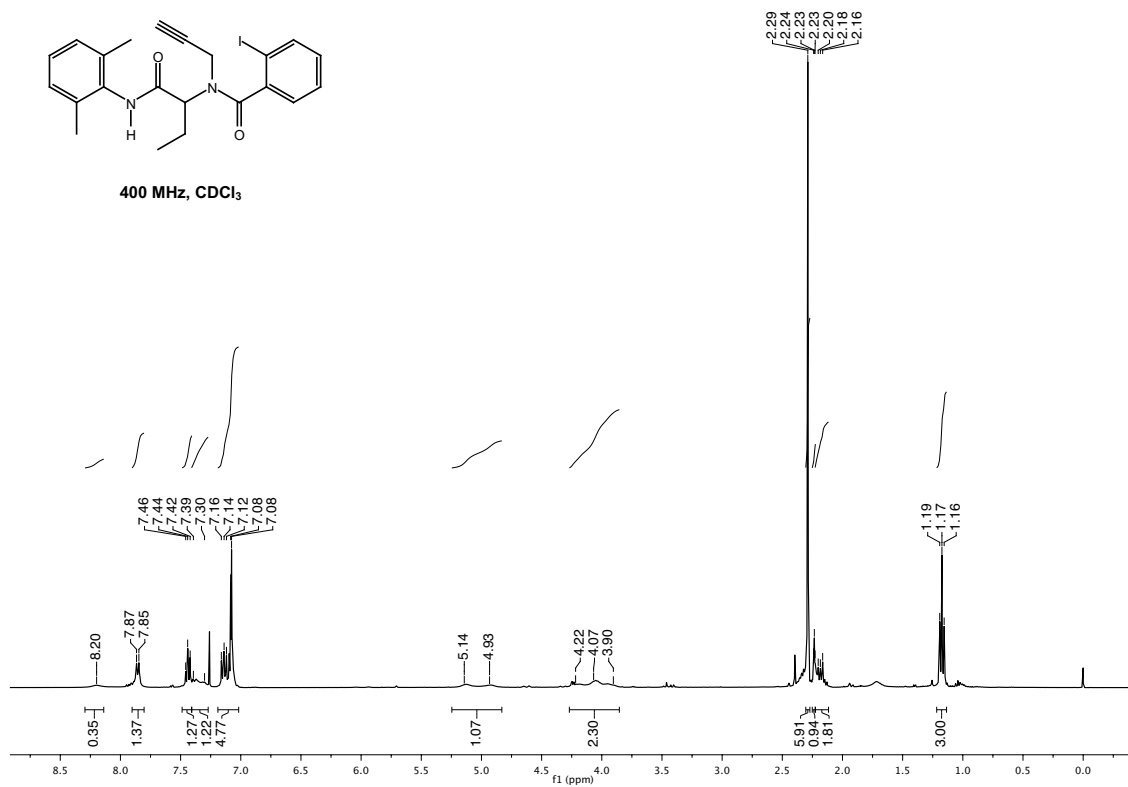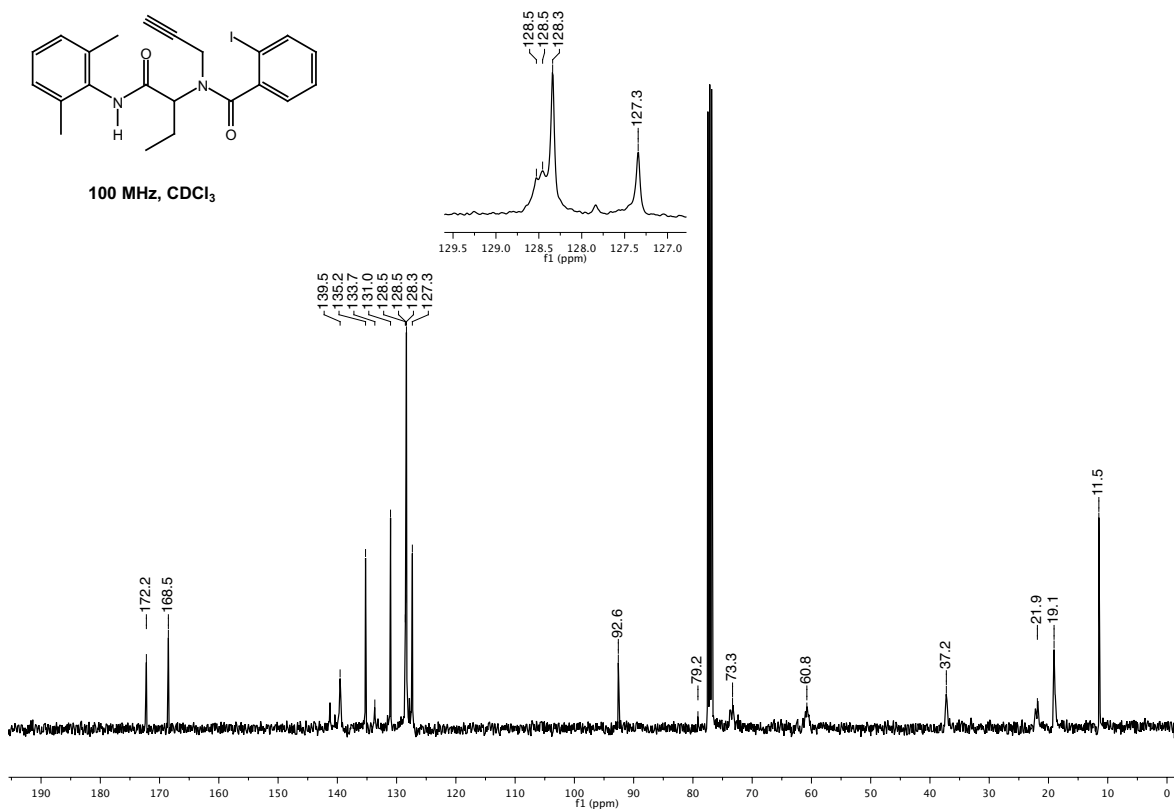

***N*-(1-((2,6-dimethylphenyl)amino)-1-oxopropan-2-yl)-2-iodo-*N*-(prop-2-yn-1-yl)benzamide (11r)**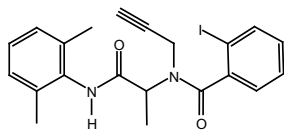400 MHz, CDCl<sub>3</sub>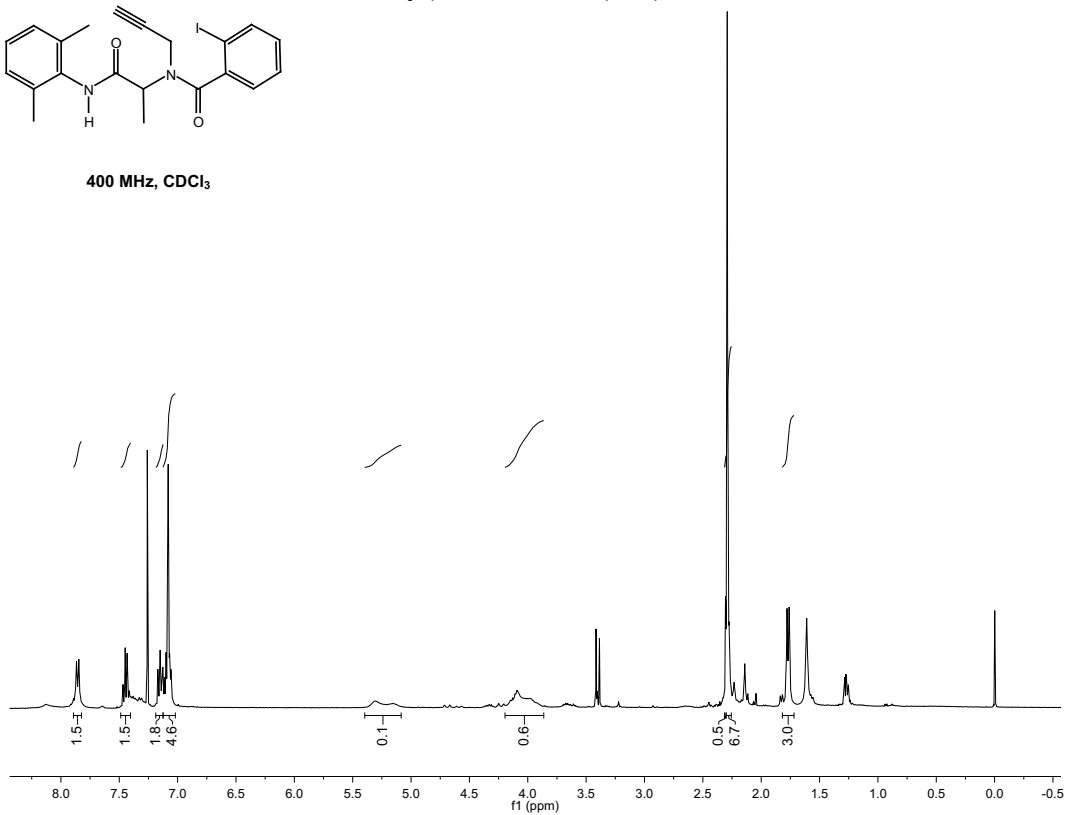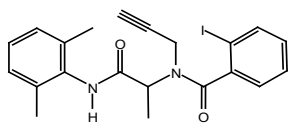100 MHz, CDCl<sub>3</sub>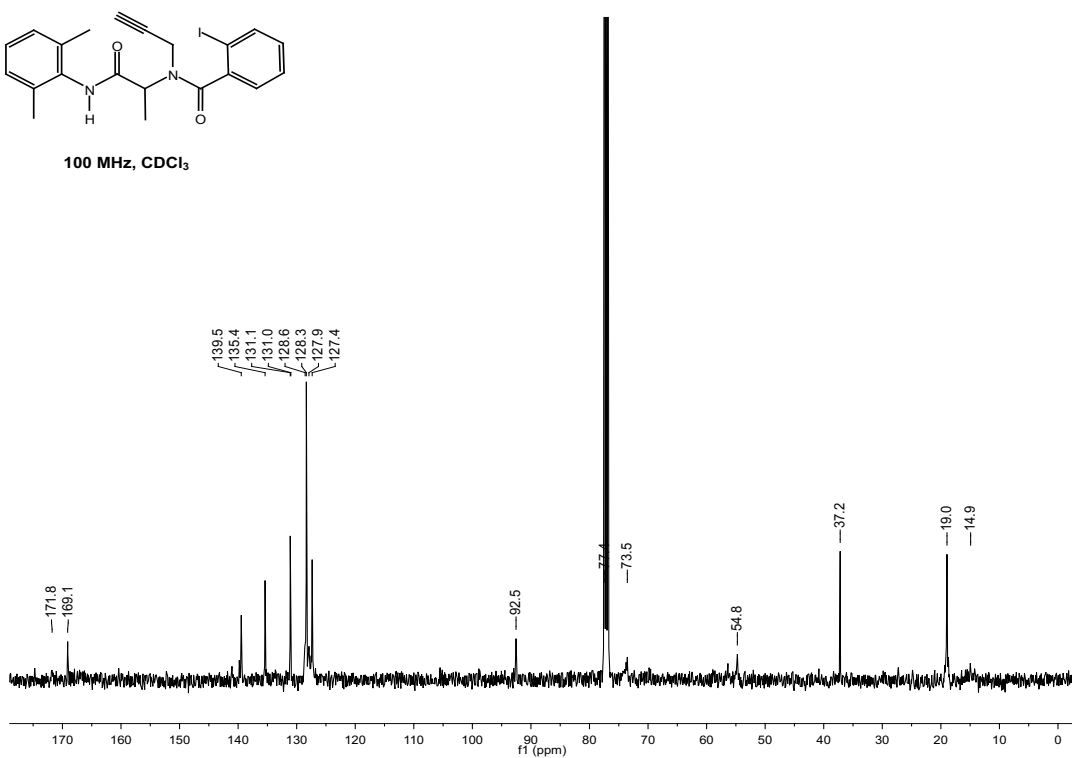

***N*-(1-(cyclohexylamino)-1-oxohexan-2-yl)-2-iodo-*N*-(prop-2-yn-1-yl)benzamide (11s)**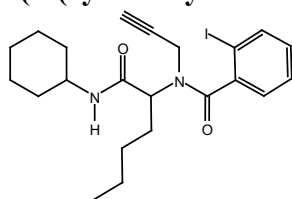300 MHz, CDCl<sub>3</sub>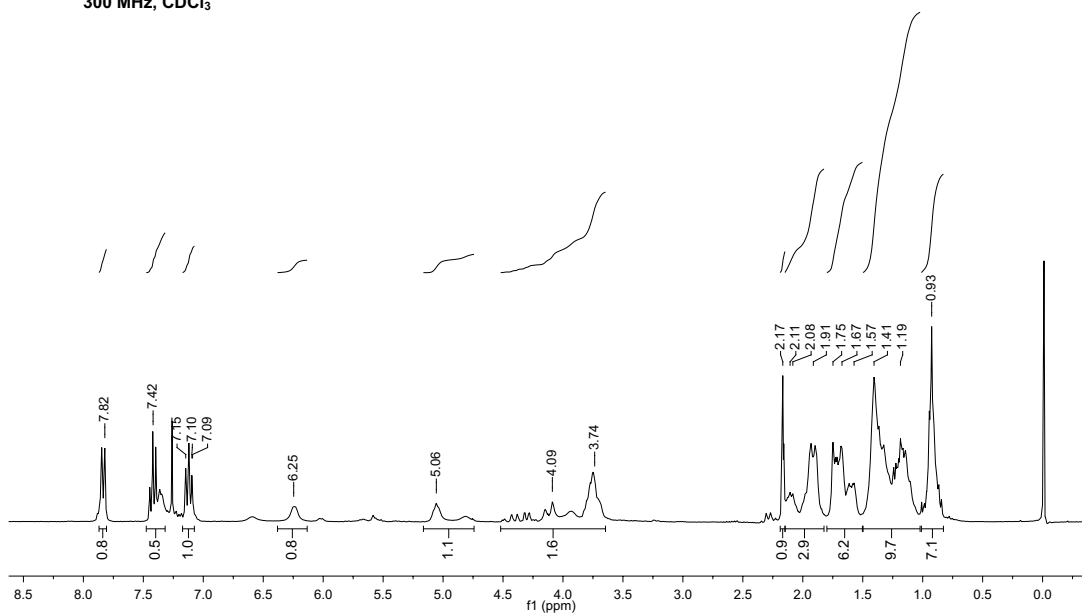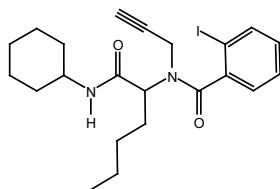75 MHz, CDCl<sub>3</sub>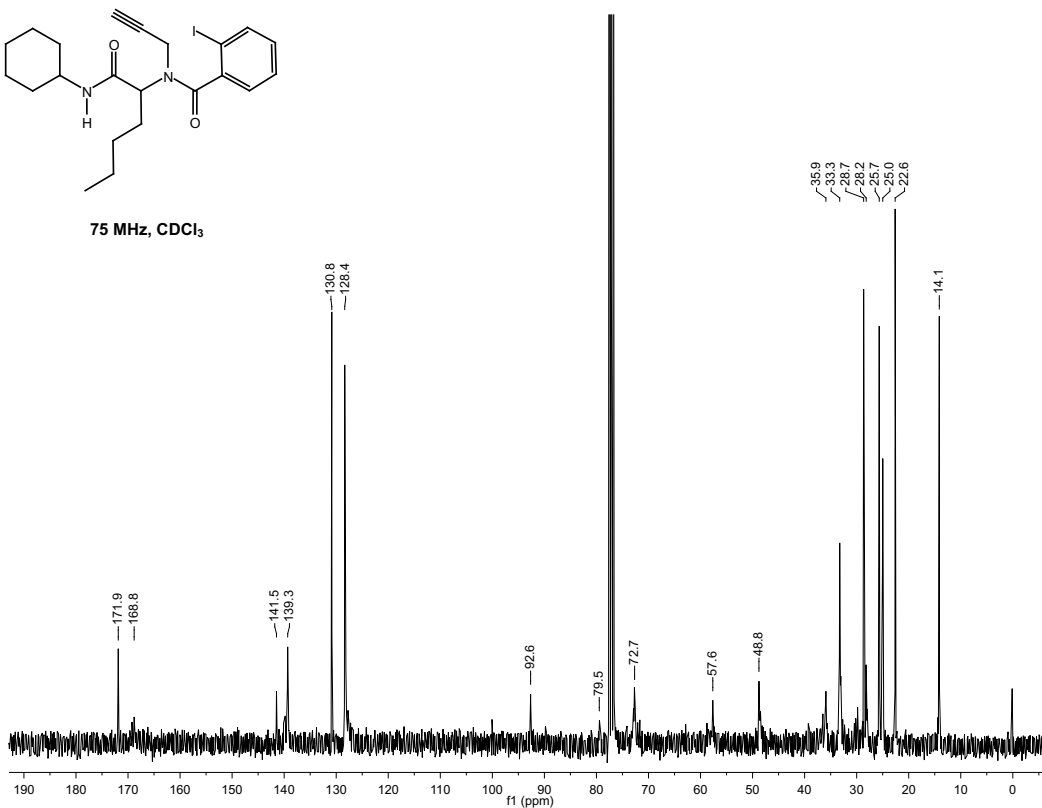

***N*-(1-(cyclohexylamino)-1-oxopropan-2-yl)-2-iodo-*N*-(prop-2-yn-1-yl)benzamide (11t)**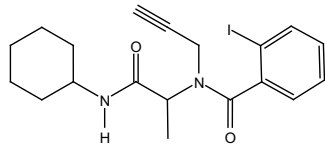300 MHz, CDCl<sub>3</sub>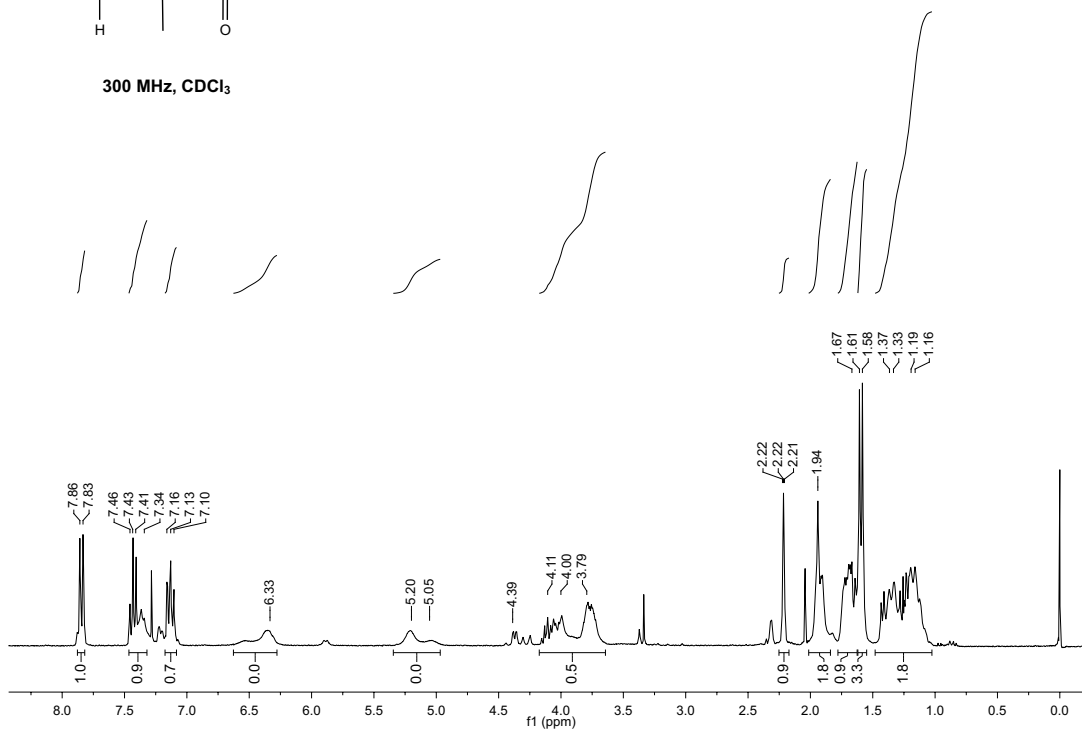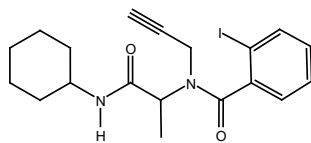75 MHz, CDCl<sub>3</sub>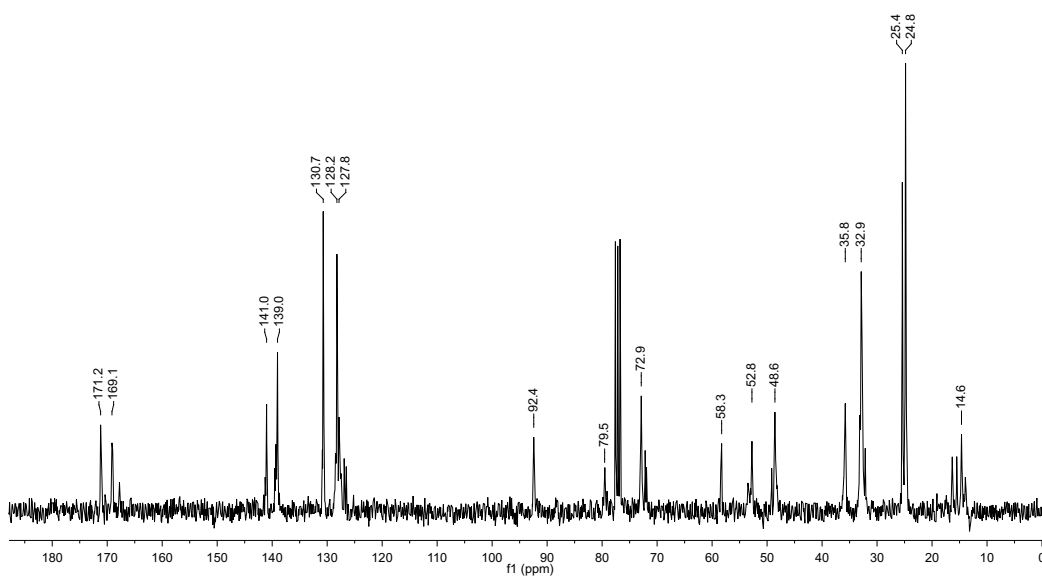

***N*-(1-(*tert*-butylamino)-1-oxobutan-2-yl)-2-iodo-*N*-(prop-2-yn-1-yl)benzamide (11u)**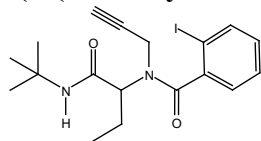300 MHz, CDCl<sub>3</sub>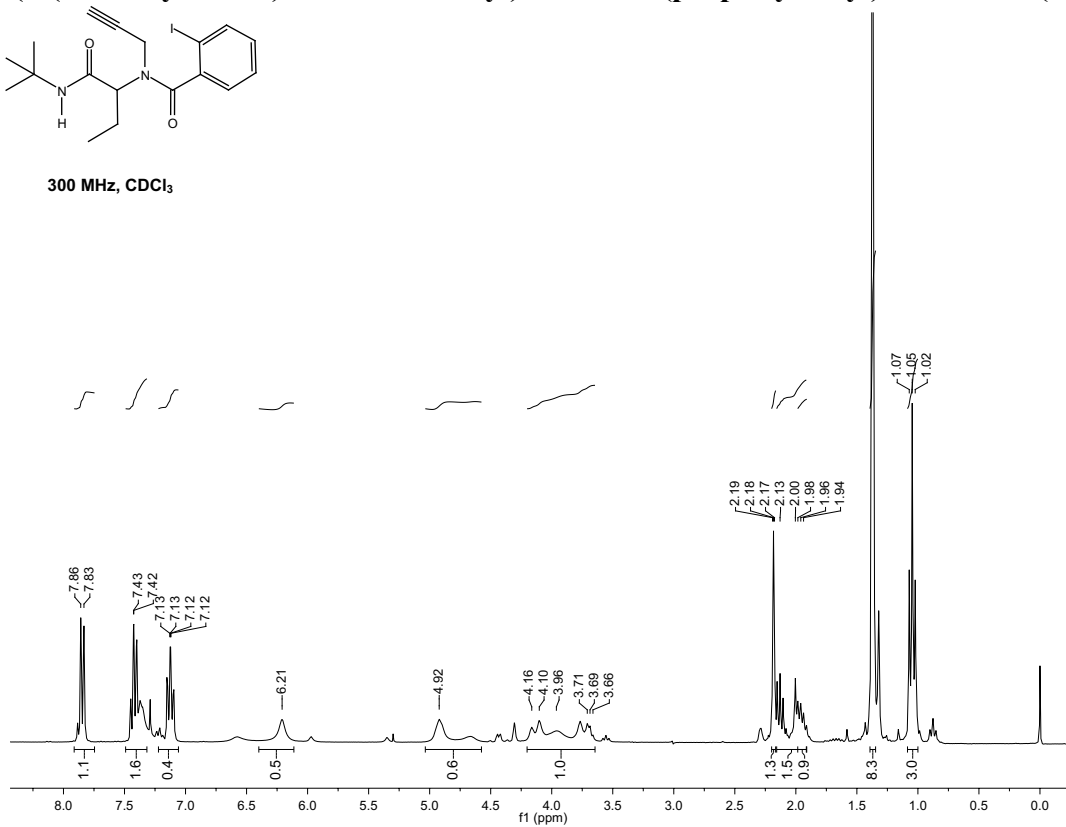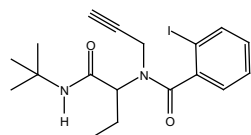75 MHz, CDCl<sub>3</sub>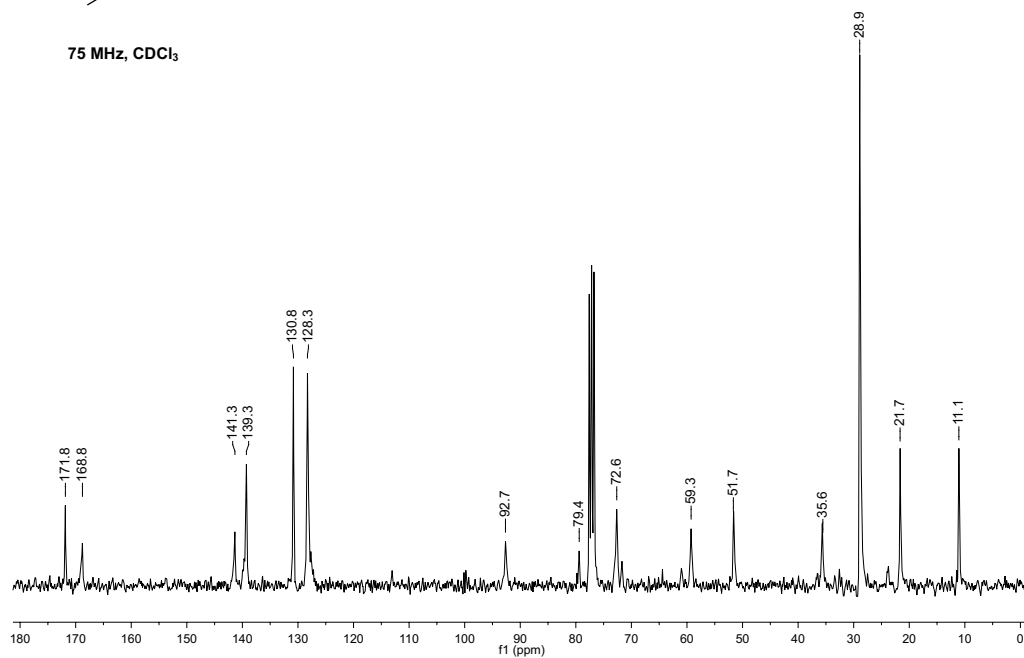

***N*-(1-(benzylamino)-3-methyl-1-oxobutan-2-yl)-2-iodo-*N*-(prop-2-yn-1-yl)benzamide (11v)**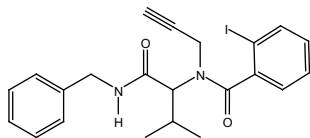300 MHz, CDCl<sub>3</sub>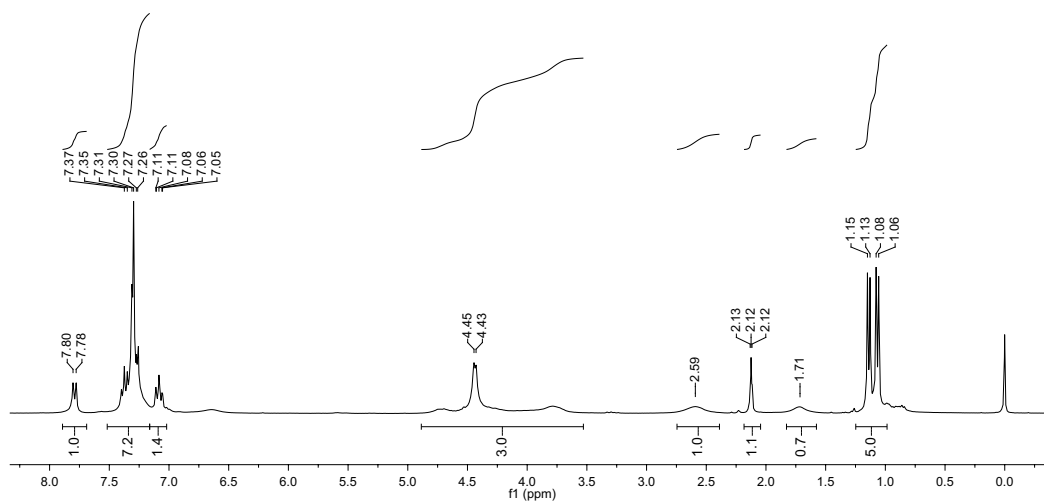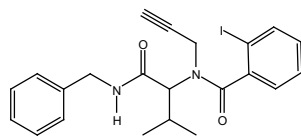75 MHz, CDCl<sub>3</sub>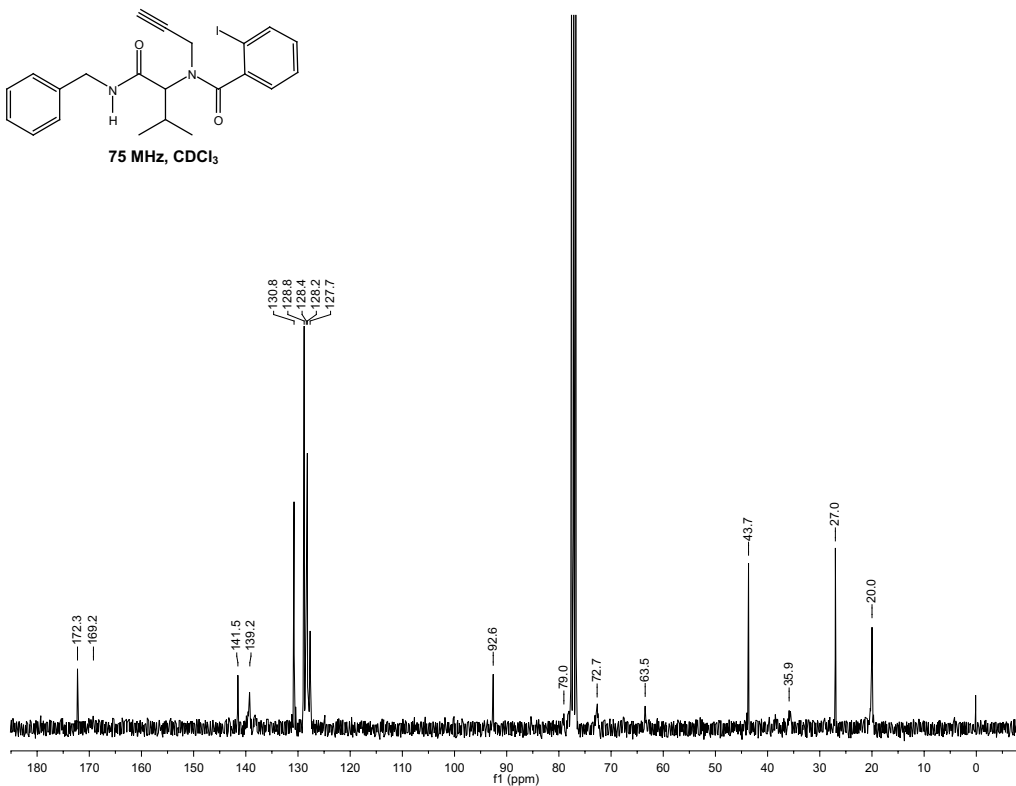

**2-iodo-N-(1-(naphthalen-2-ylamino)-1-oxobutan-2-yl)-N-(prop-2-yn-1-yl)benzamide  
(11w)**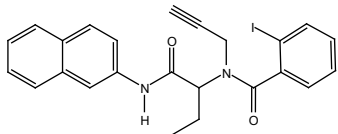300 MHz, CDCl<sub>3</sub>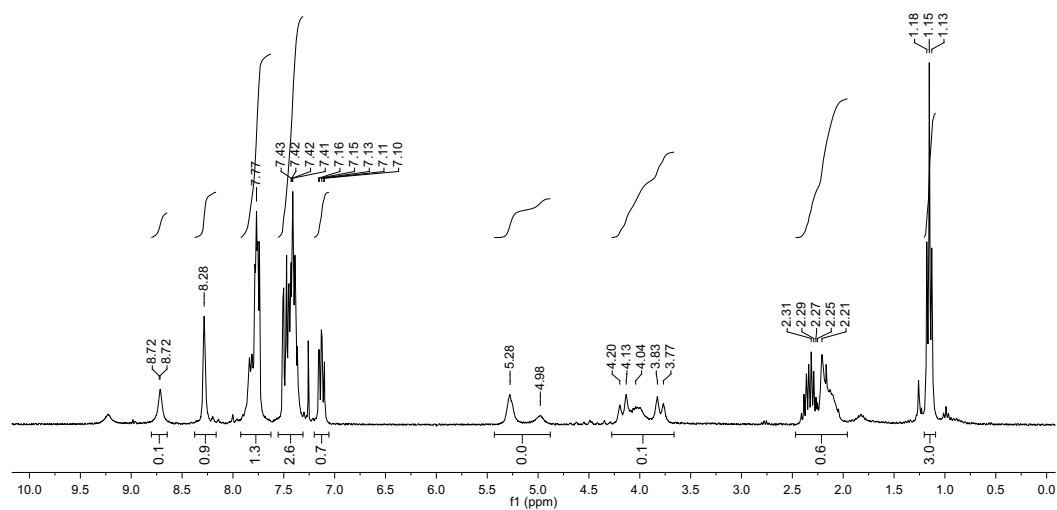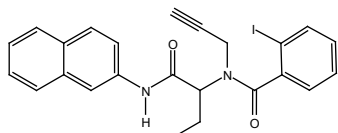75 MHz, CDCl<sub>3</sub>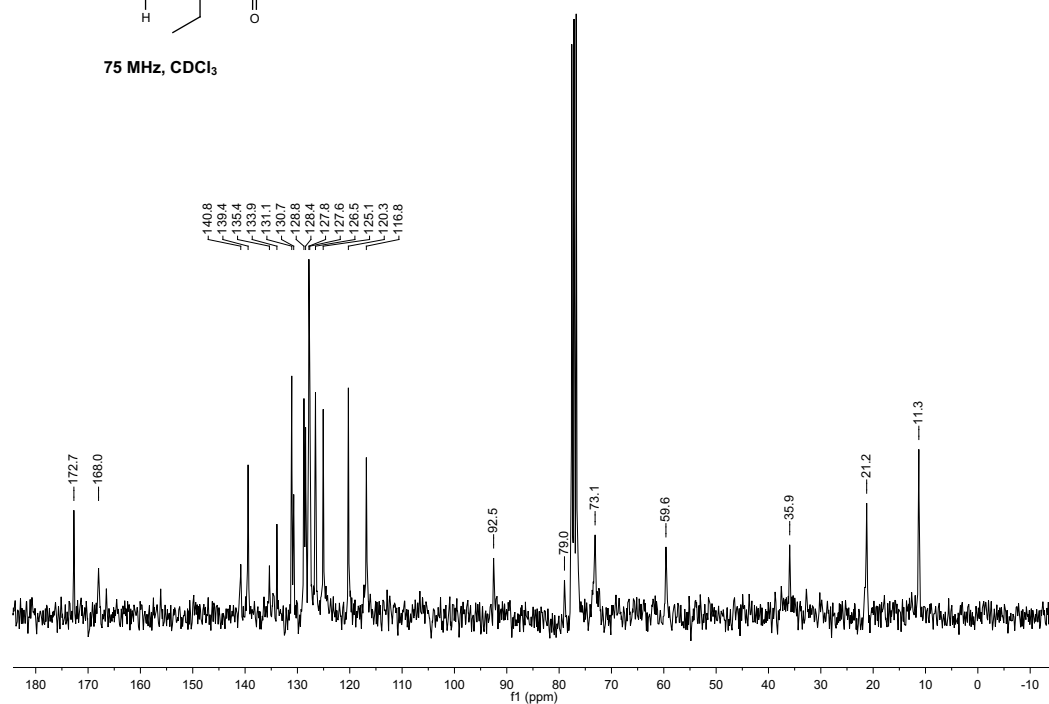



**2-(2-(2-iodophenyl)-N-(prop-2-yn-1-yl)acetamido)-N-(4-methoxyphenyl)butanamide (11x)**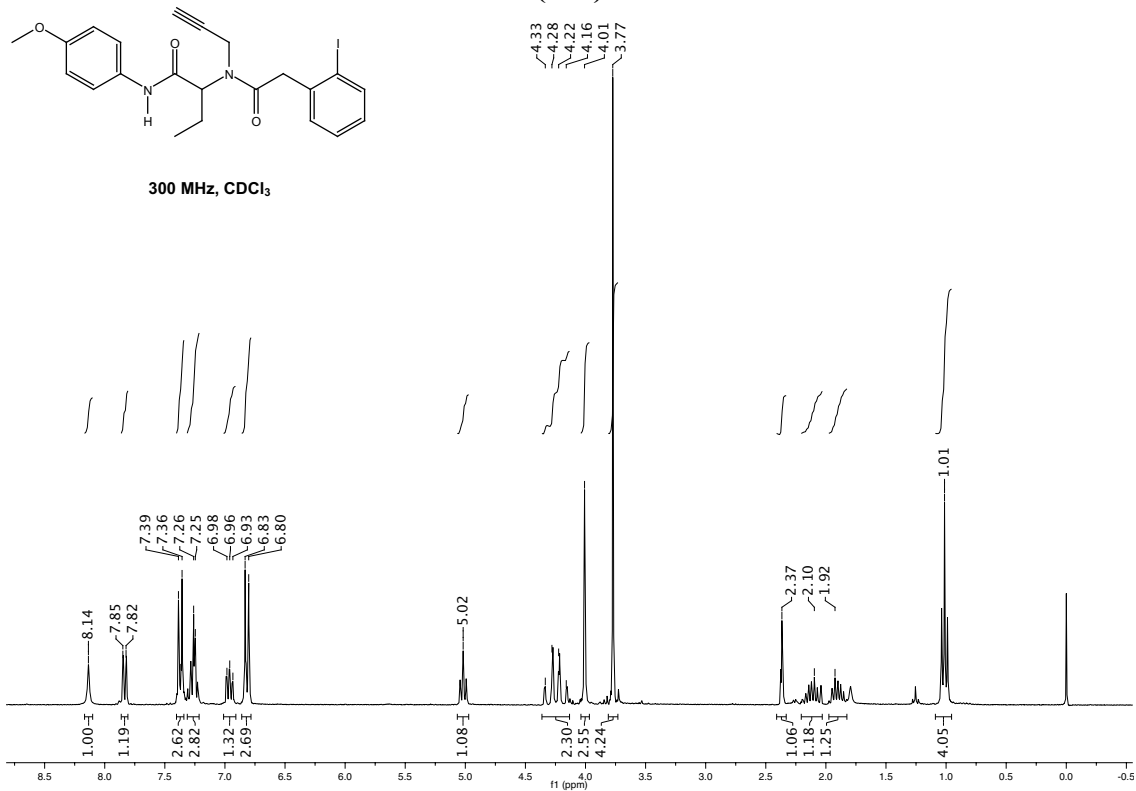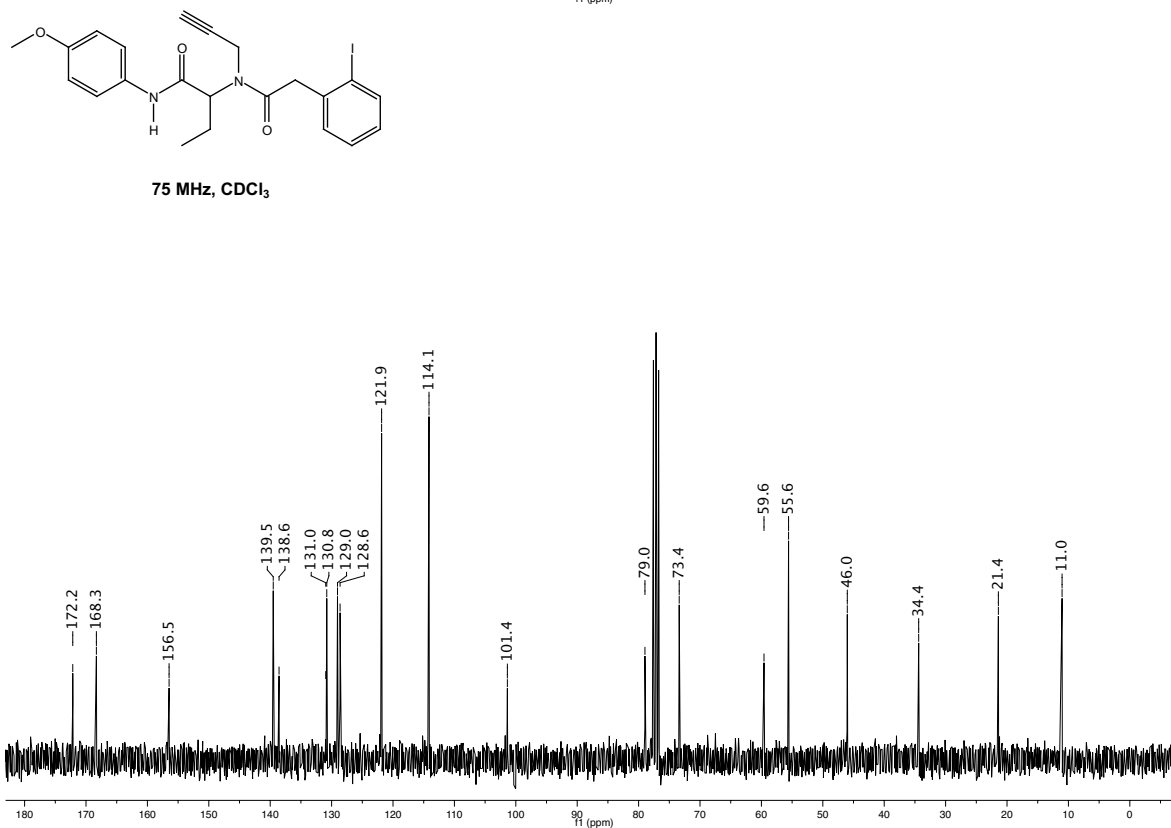

## 2-(4-chlorophenyl)-N-cyclohexyl-2-(N-(prop-2-yn-1-yl)acetamido)acetamide (11y)

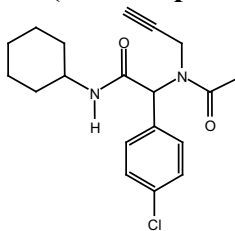300 MHz, CDCl<sub>3</sub>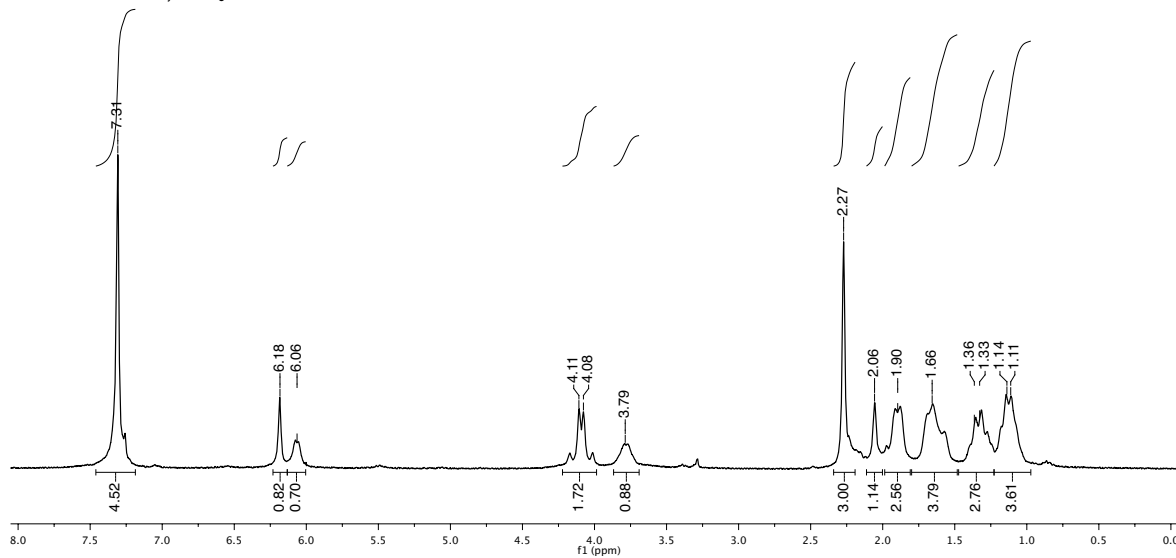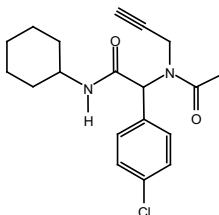75 MHz, CDCl<sub>3</sub>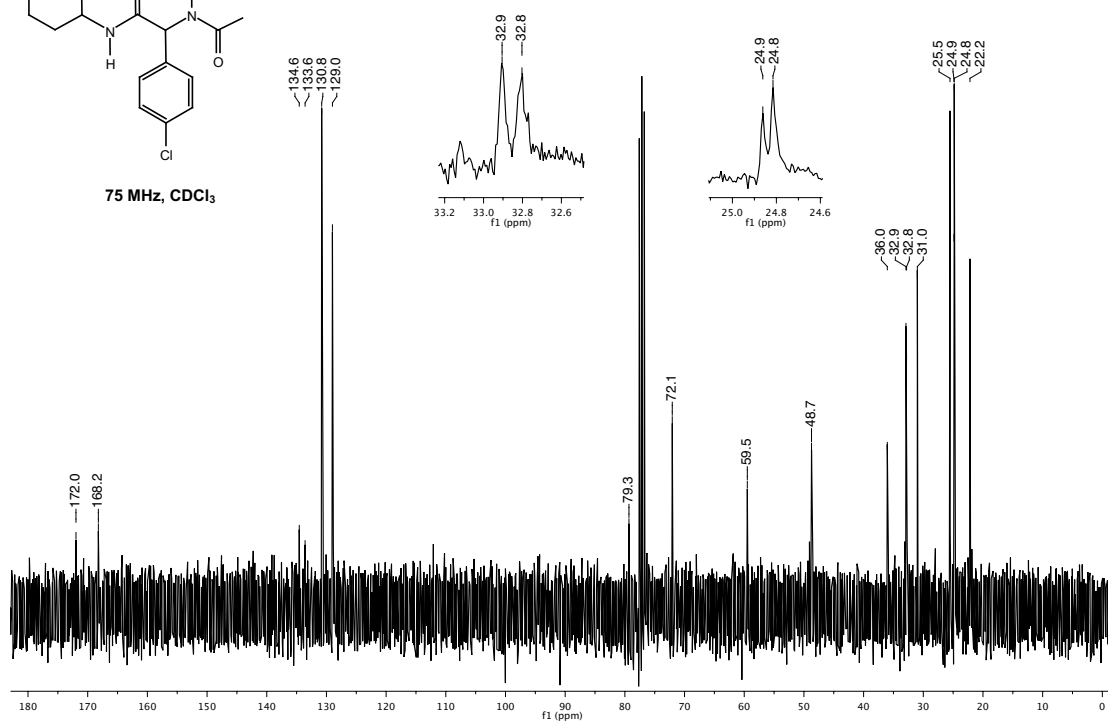

## Dihydropyrazinone spectra

4-Acetyl-1-(2,6-dimethylphenyl)-6-methyl-3-propyl-3,4-dihydropyrazin-2(1H)-one  
(13a)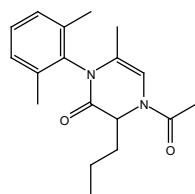300 MHz, CDCl<sub>3</sub>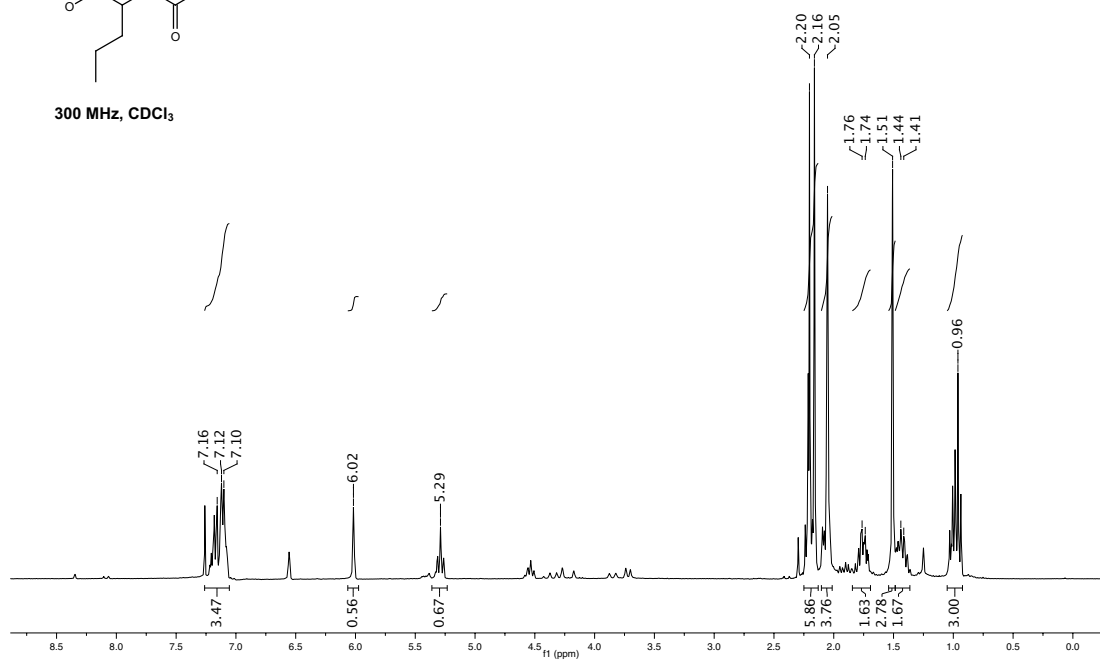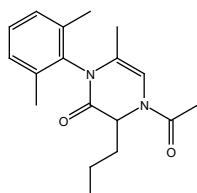75 MHz, CDCl<sub>3</sub>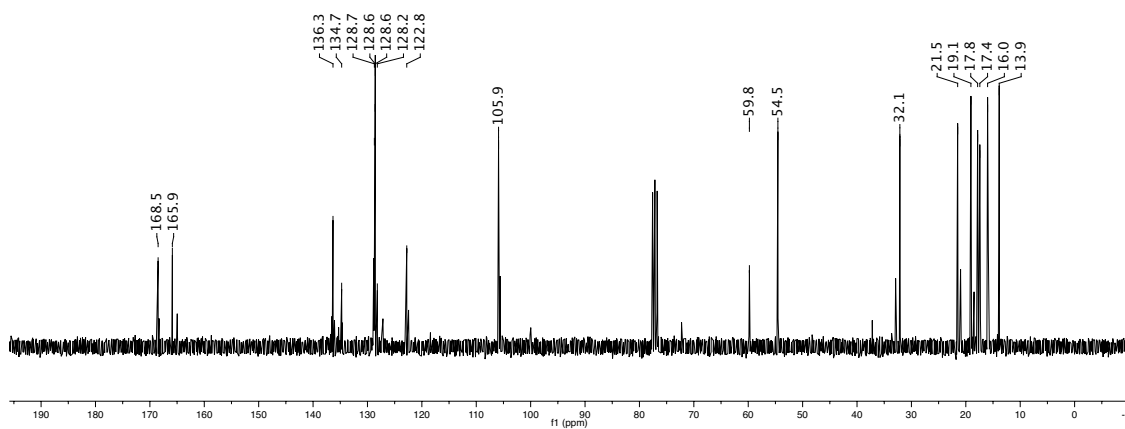

**4-Acetyl-1-(2,6-dimethylphenyl)-3-isopropyl-6-methyl-3,4-dihydropyrazin-2(1H)-one (13b)**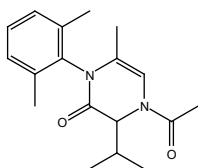300 MHz, CDCl<sub>3</sub>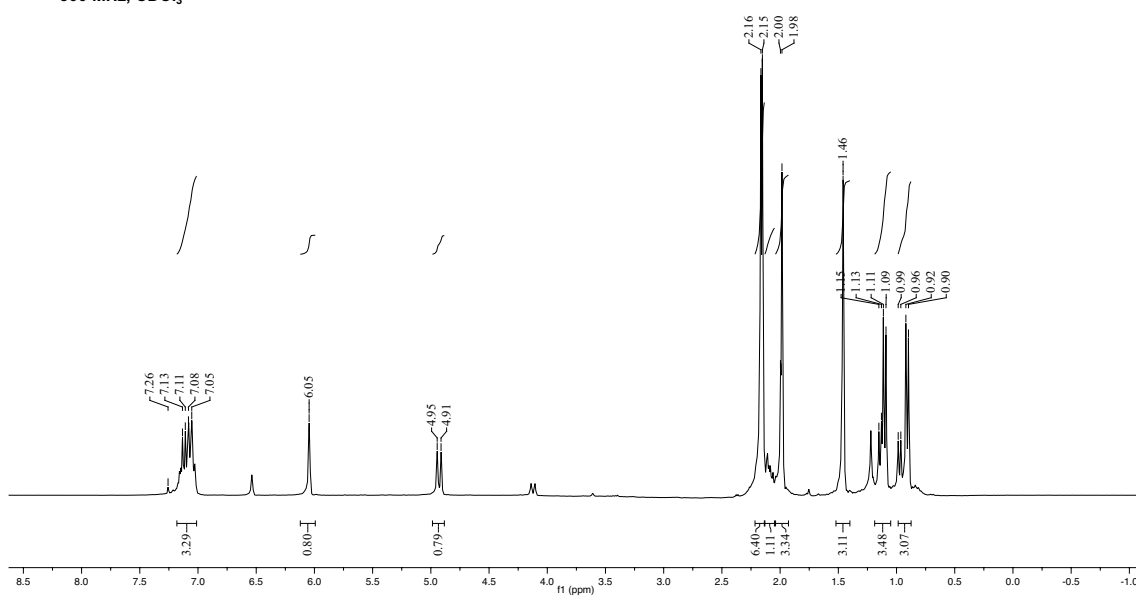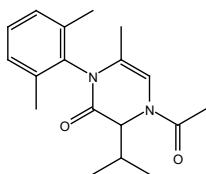75 MHz, CDCl<sub>3</sub>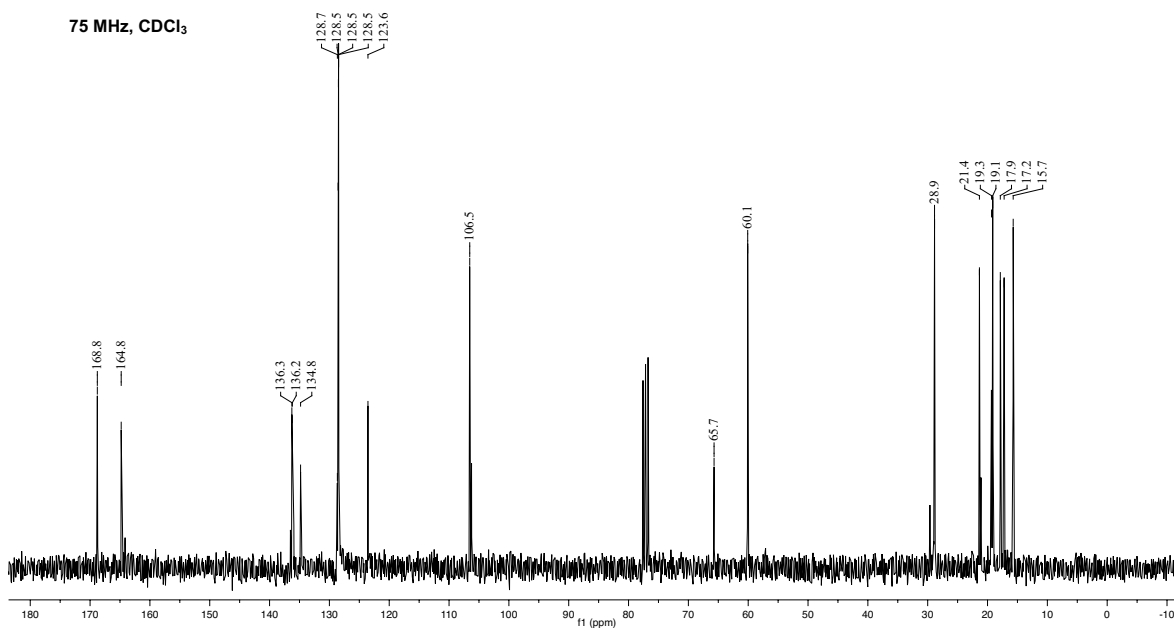

## 4-Acetyl-3-butyl-1-(2,6-dimethylphenyl)-6-methyl-3,4-dihydropyrazin-2(1H)-one (13c)

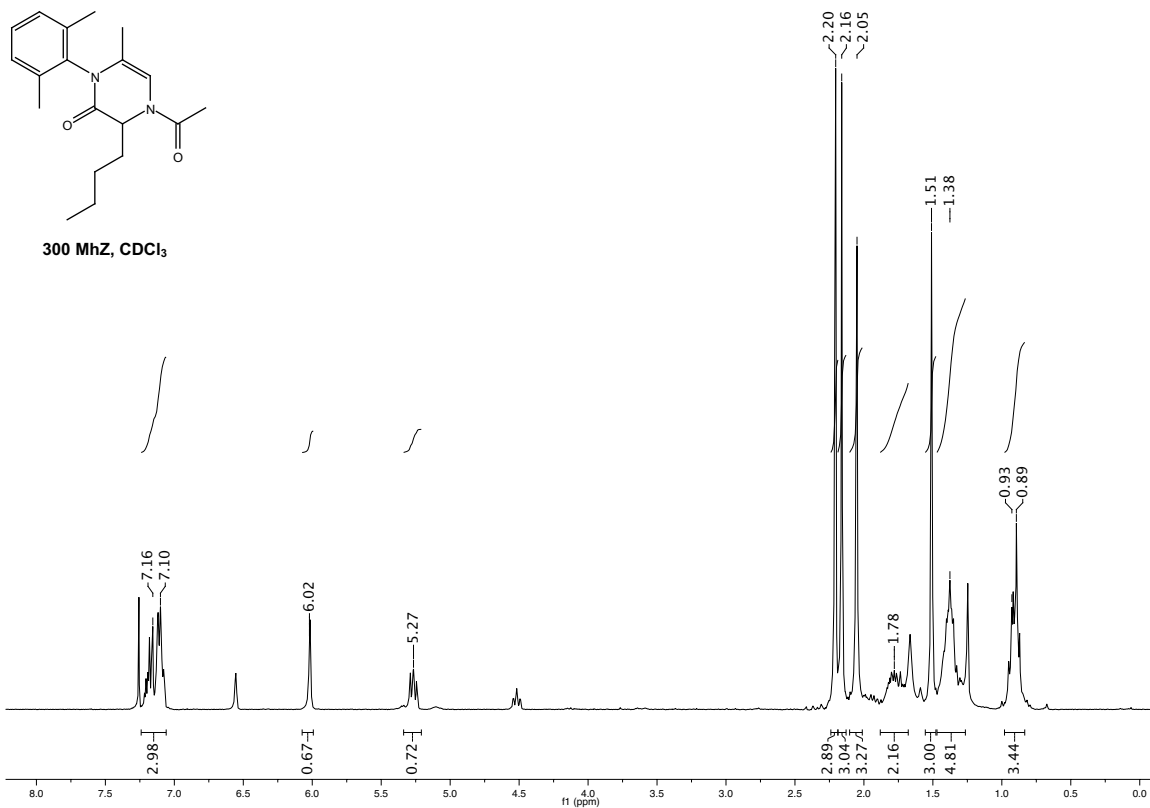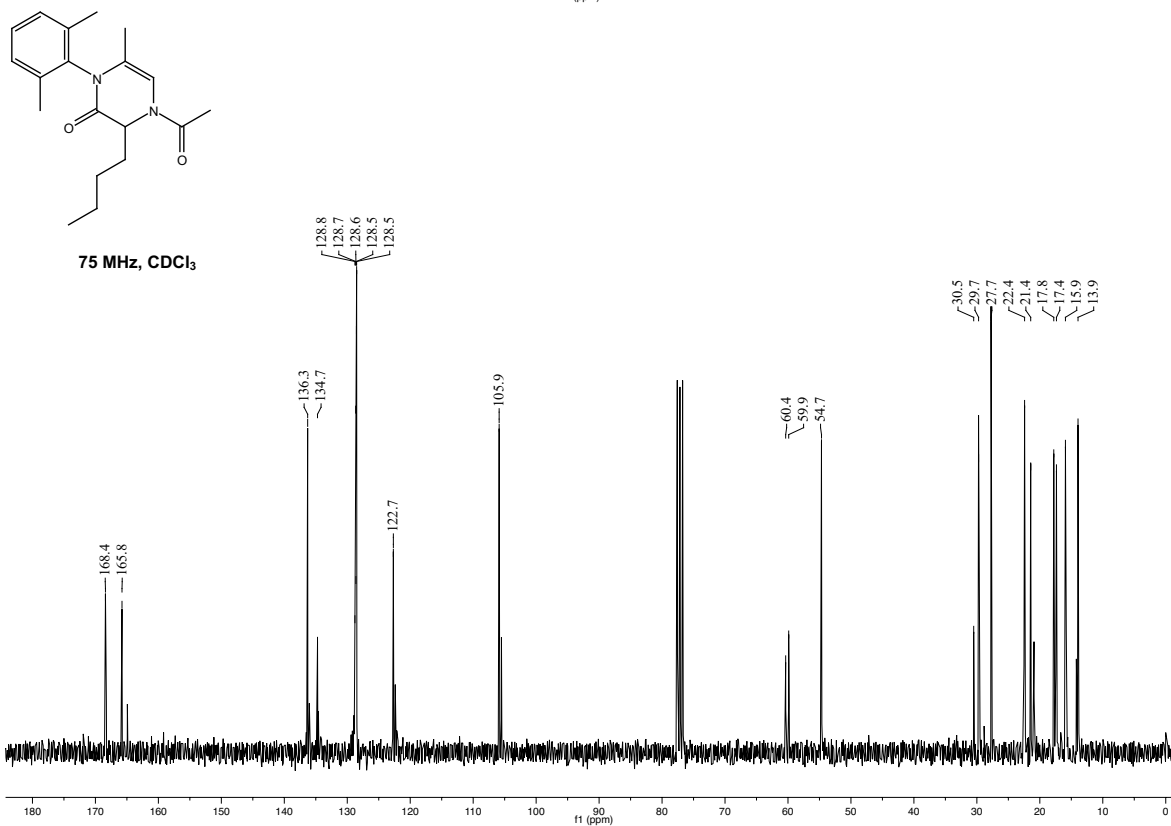

**4-Acetyl-1-(2,6-dimethylphenyl)-3-ethyl-6-methyl-3,4-dihydropyrazin-2(1H)-one (13d)**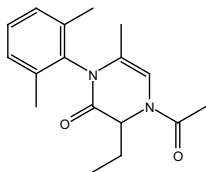300 MHz, CDCl<sub>3</sub>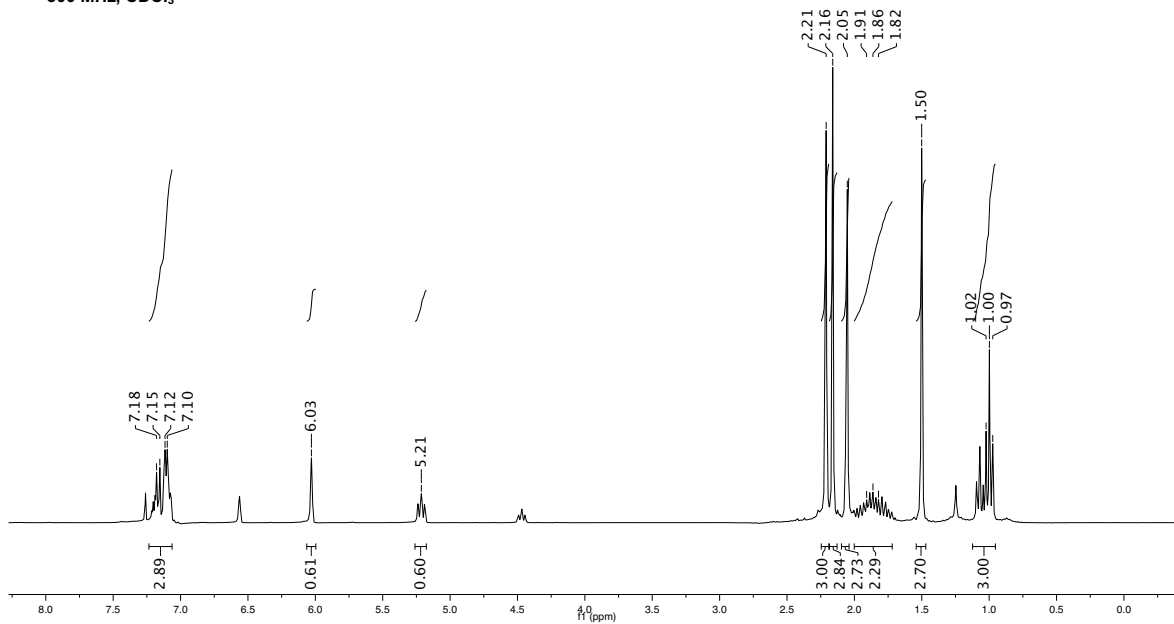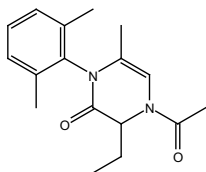75MHz, CDCl<sub>3</sub>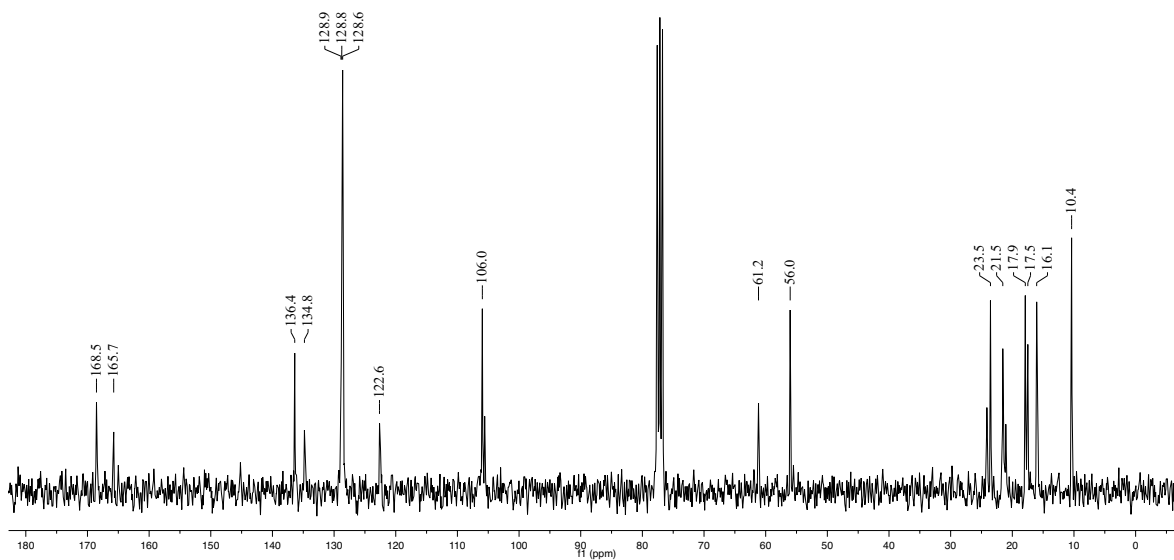

## 4-Acetyl-1-(2,6-dimethylphenyl)-6-methyl-3,4-dihydropyrazin-2(1H)-one (13e).

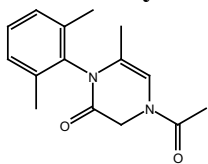300 MHz, CDCl<sub>3</sub>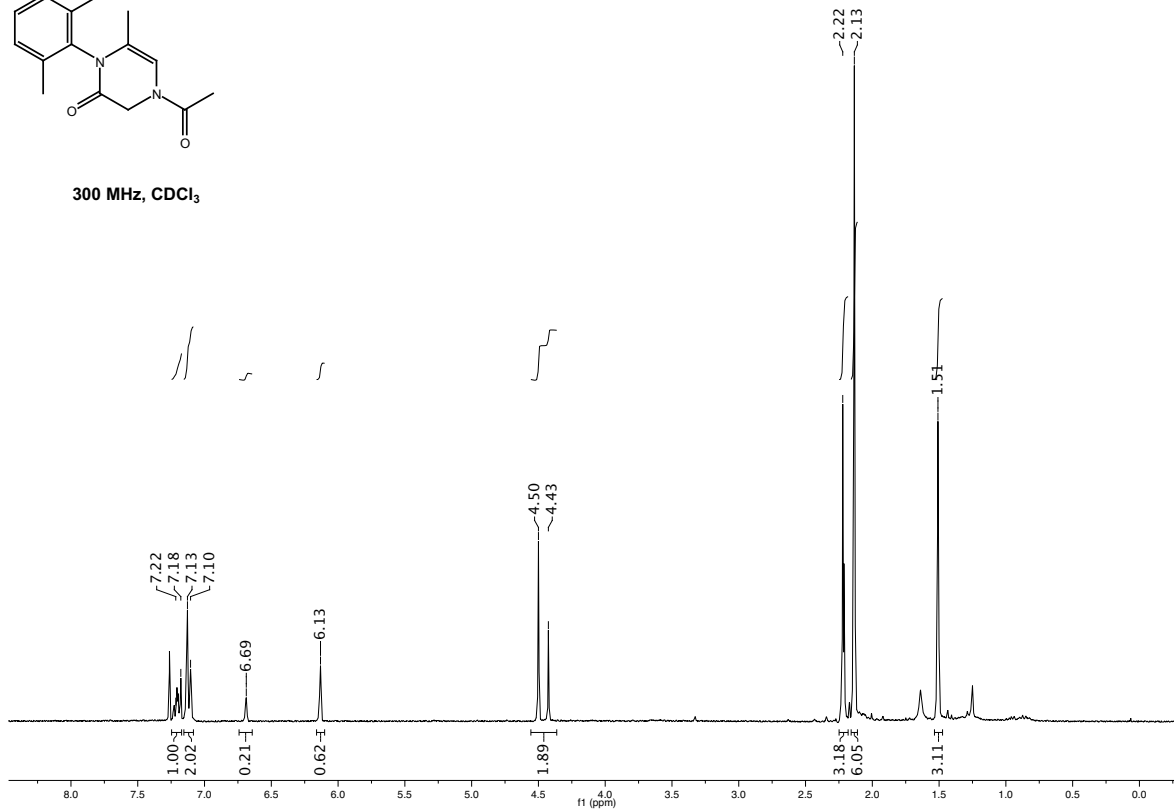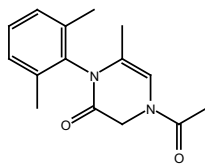75 MHz, CDCl<sub>3</sub>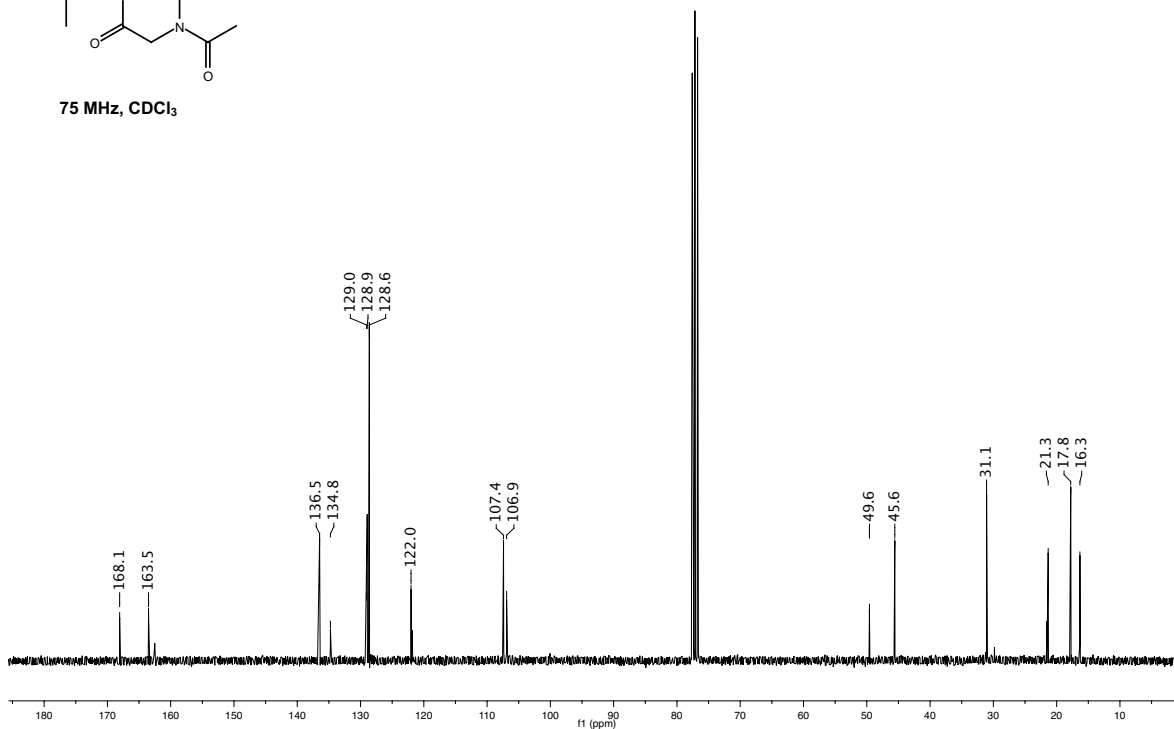

**4-Acetyl-1-(2,6-dimethylphenyl)-6-methyl-3-phenethyl-3,4-dihydropyrazin-2(1H)-one (13f)**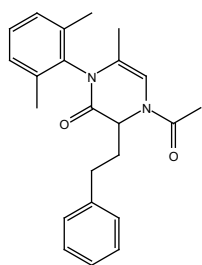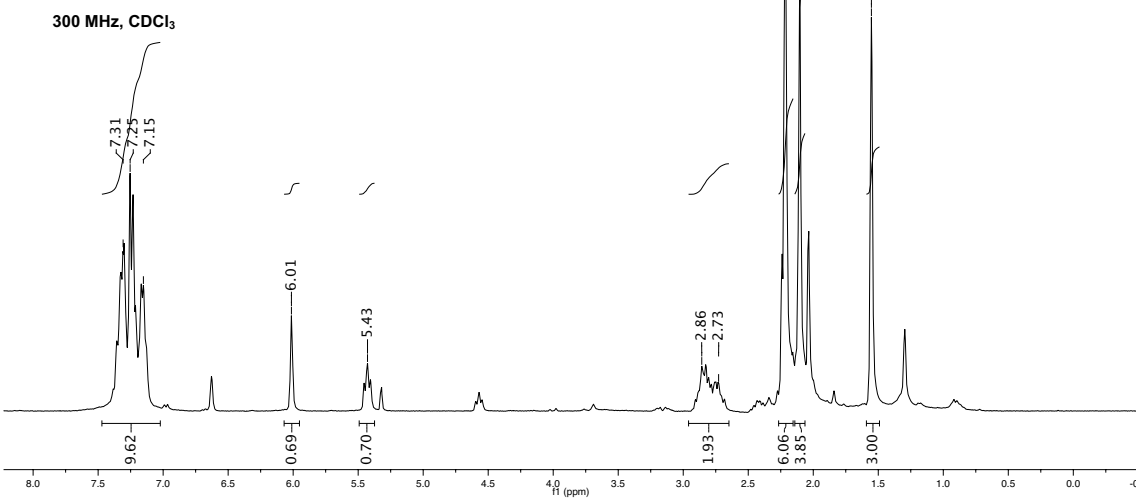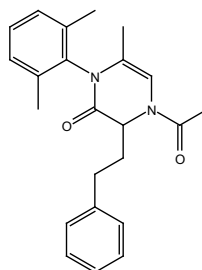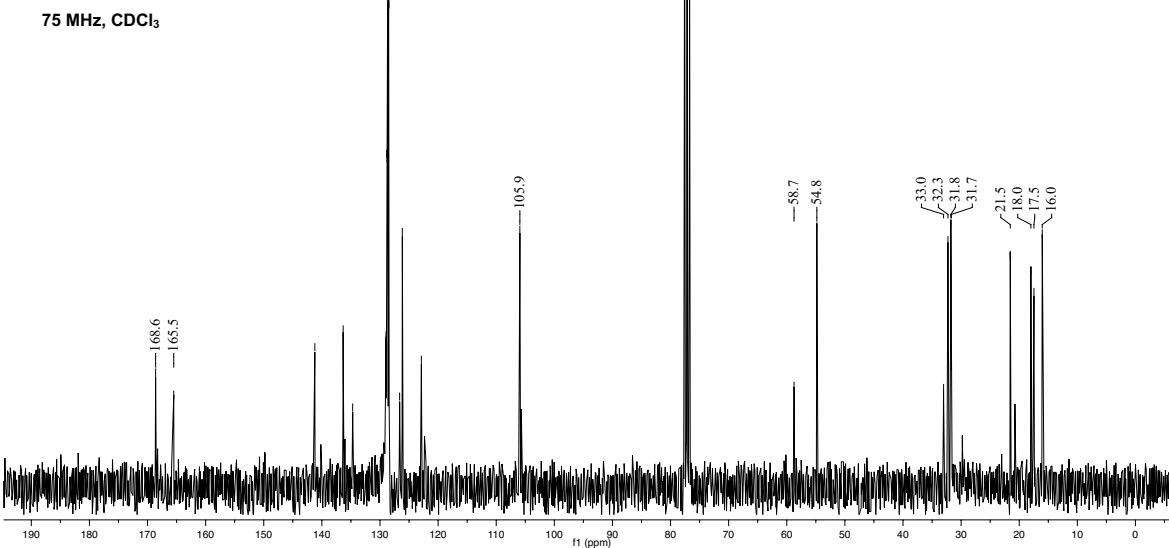



**(Variable-temperature  $^1\text{H}$  NMR studies for compound 13f)**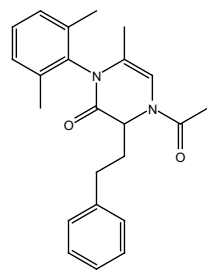300 MHz, toluene- $d_6$ , 30  $^\circ\text{C}$ 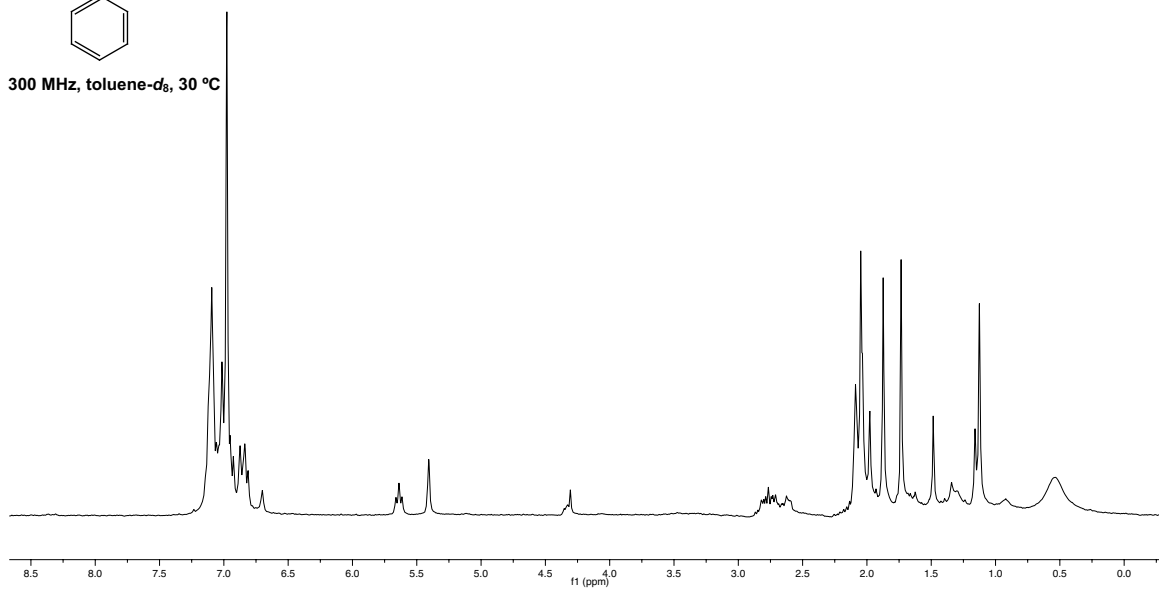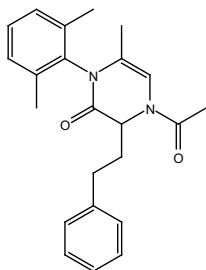300 MHz, toluene- $d_6$ , 60  $^\circ\text{C}$ 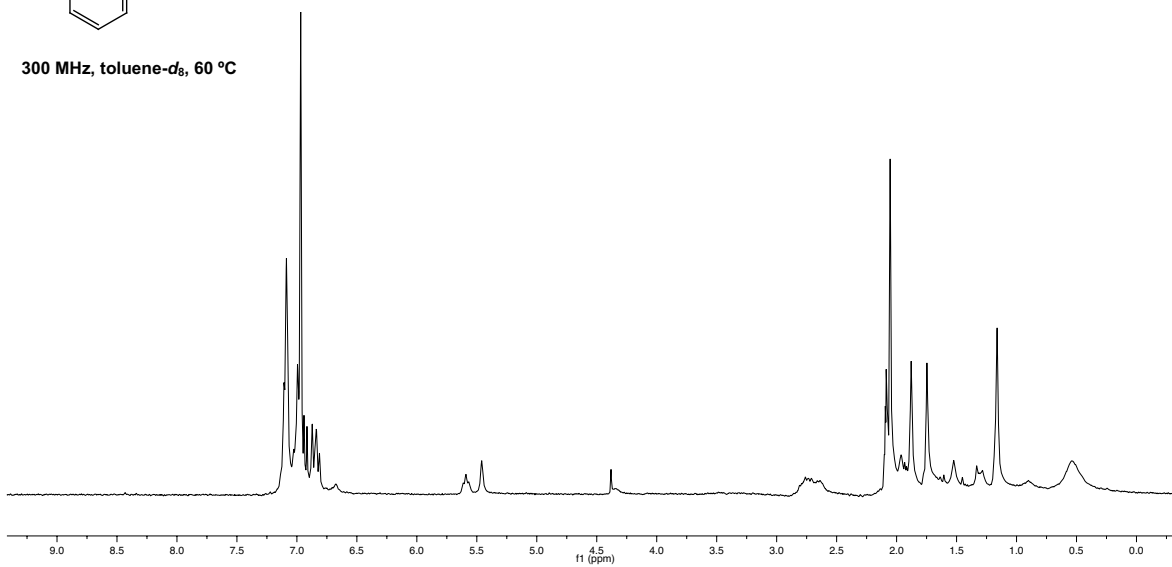

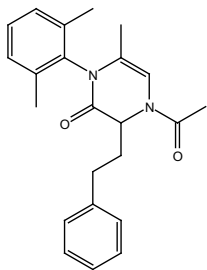

300 MHz, toluene- $d_6$ , 70 °C

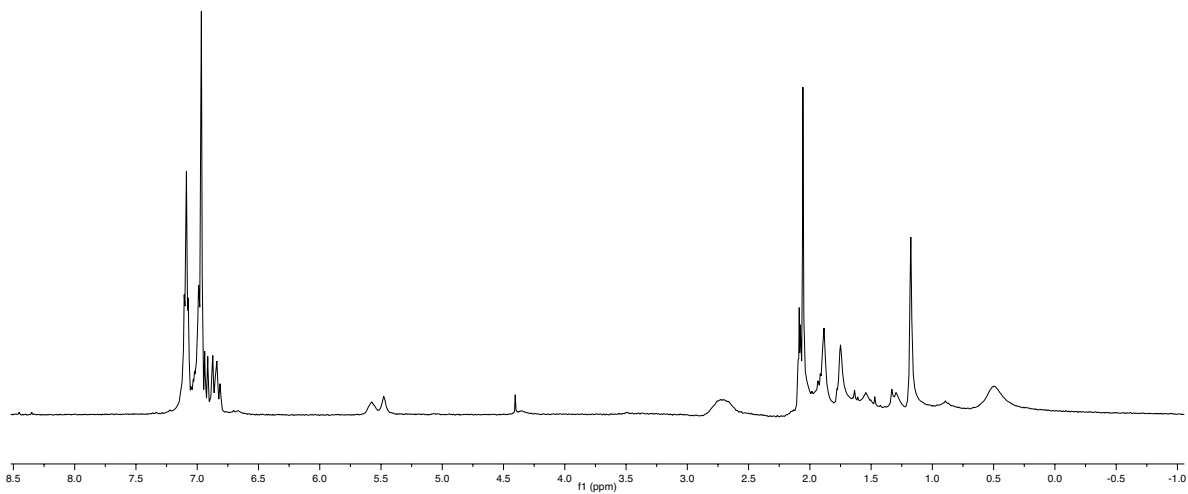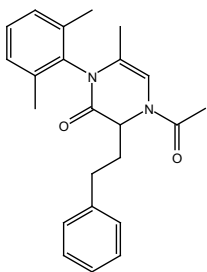

300 MHz, toluene- $d_6$ , 80 °C

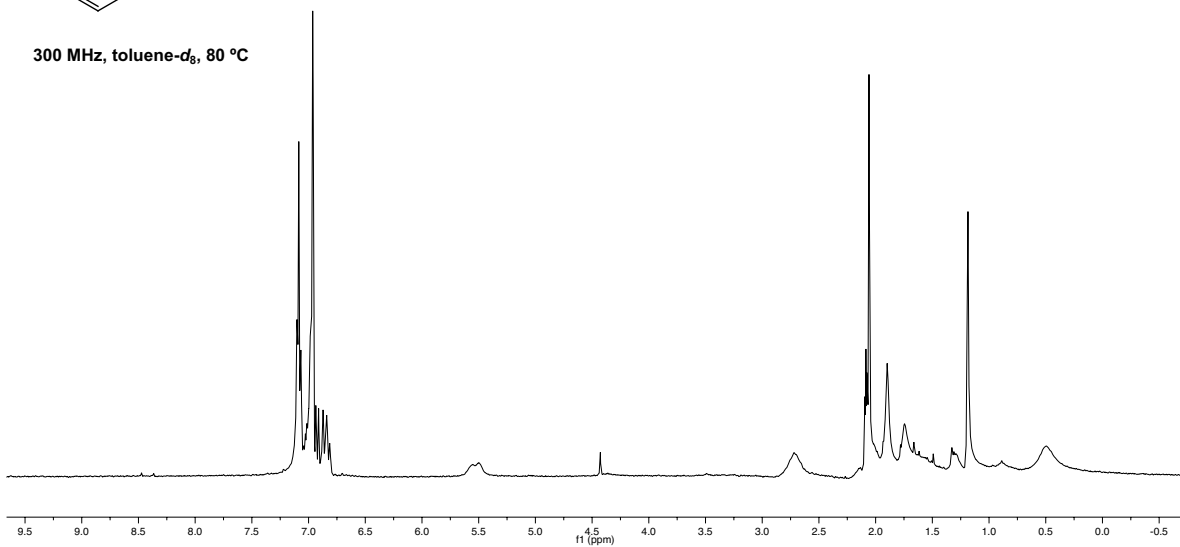

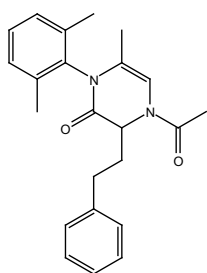

300 MHz, toluene- $d_6$ , 90 °C

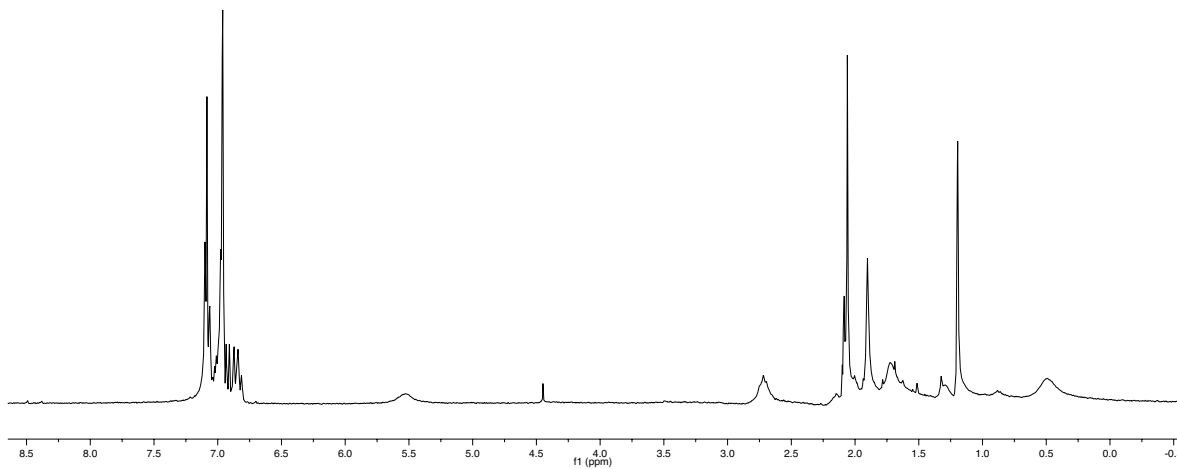

**4-Benzoyl-3-butyl-1-(2,6-dimethylphenyl)-6-methyl-3,4-dihydropyrazin-2(1H)-one  
(13g)**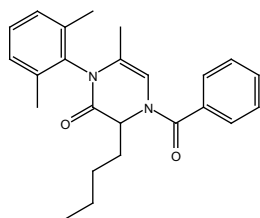300 MHz, CDCl<sub>3</sub>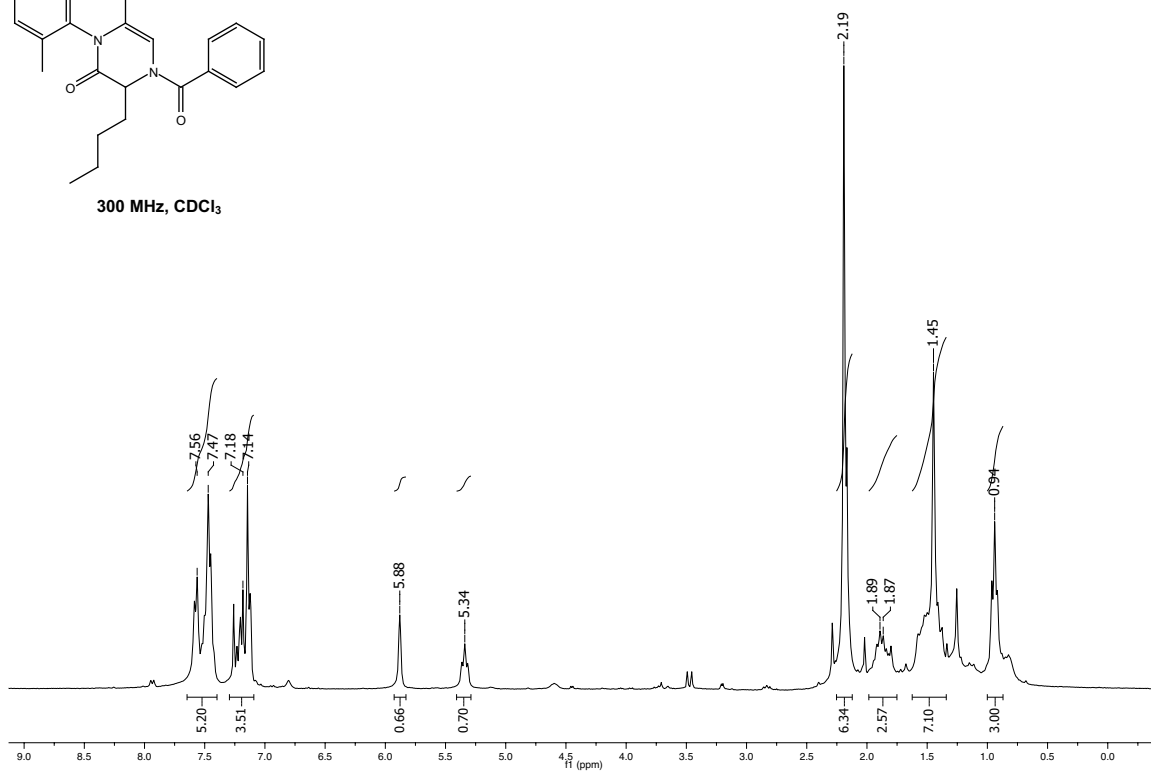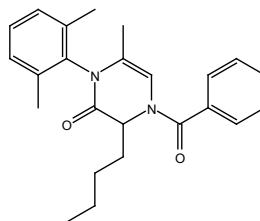75 MHz, CDCl<sub>3</sub>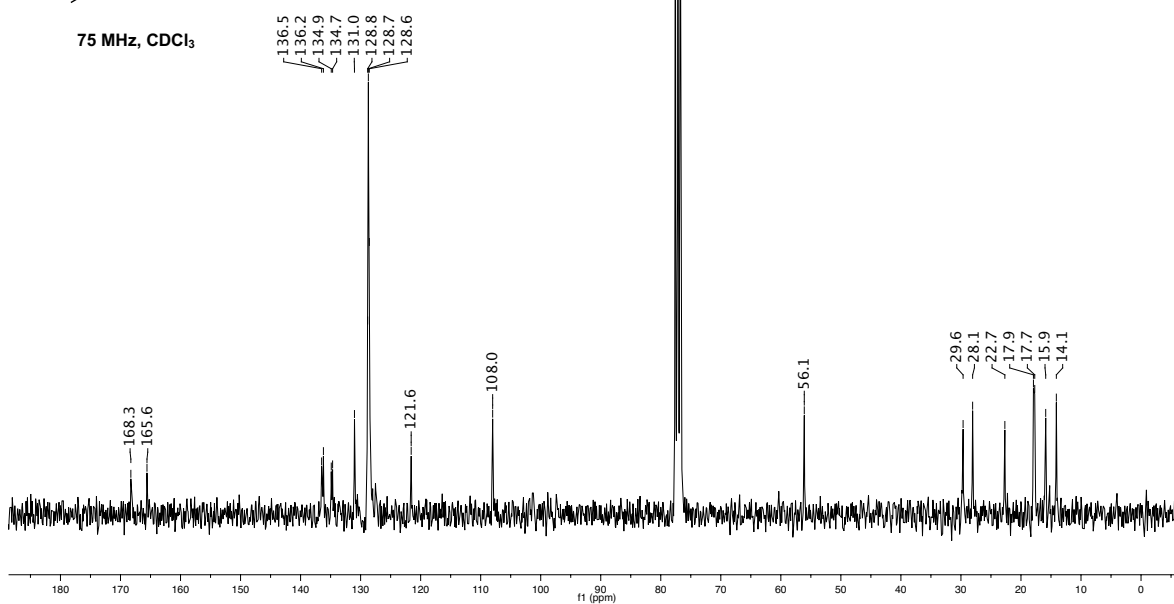

**4-Benzoyl-1-(2,6-dimethylphenyl)-3-isopropyl-6-methyl-3,4-dihydropyrazin-2(1H)-one (13h)**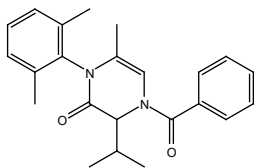300 MHz, CDCl<sub>3</sub>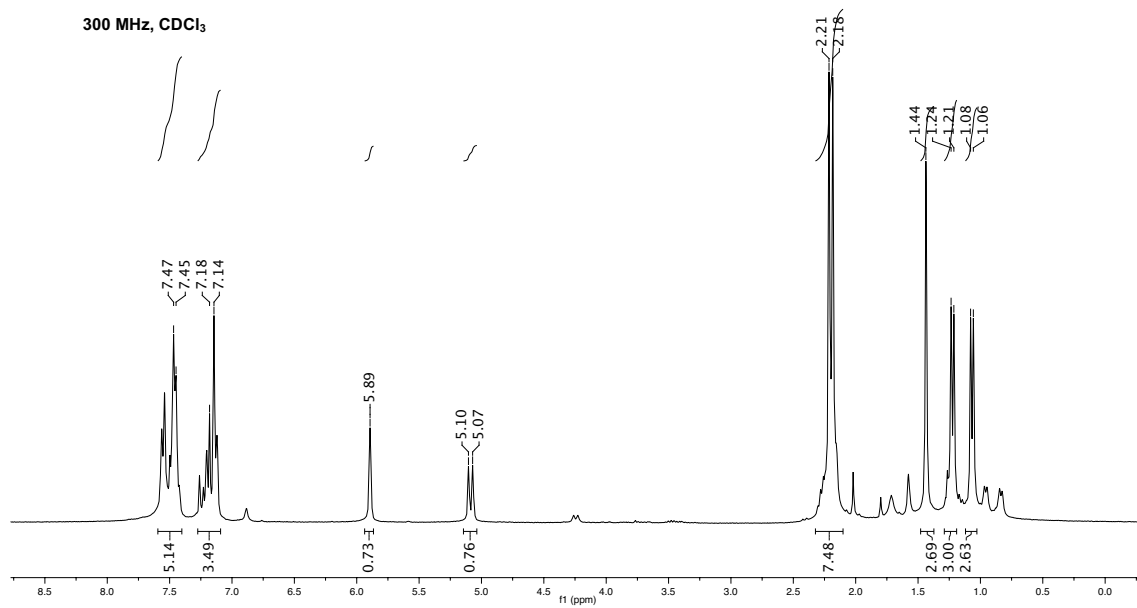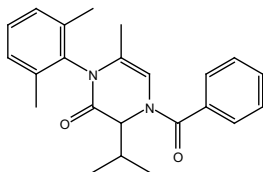75 MHz, CDCl<sub>3</sub>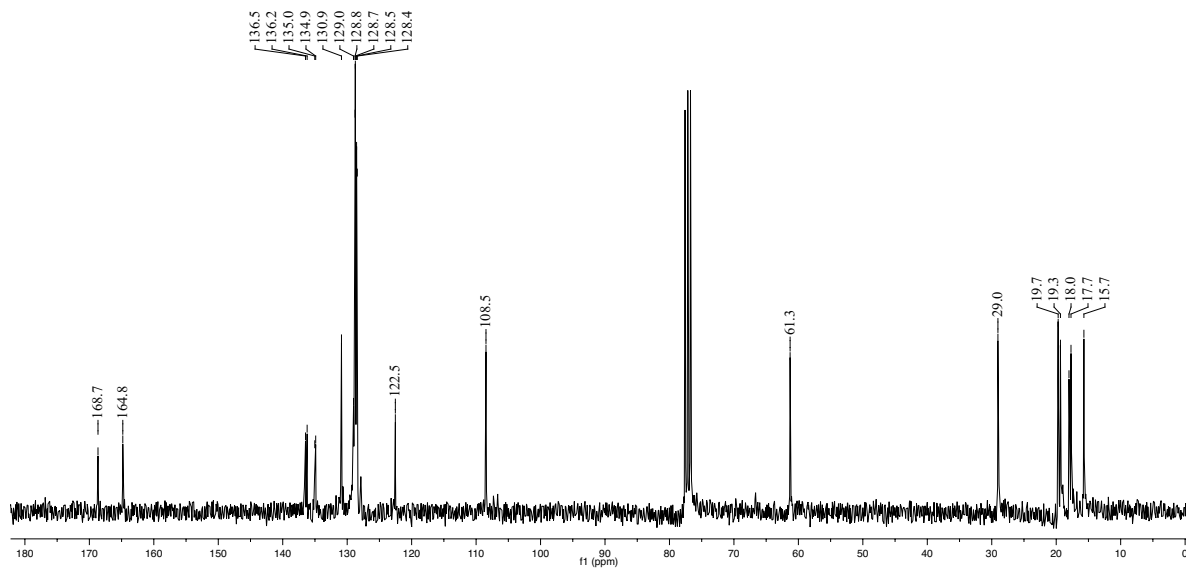

**4-benzoyl-1-(2,6-dimethylphenyl)-3-ethyl-6-methyl-3,4-dihydropyrazin-2(1H)-one (13i).**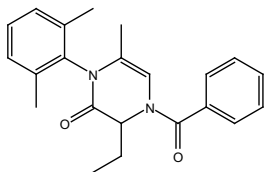300 MHz, CDCl<sub>3</sub>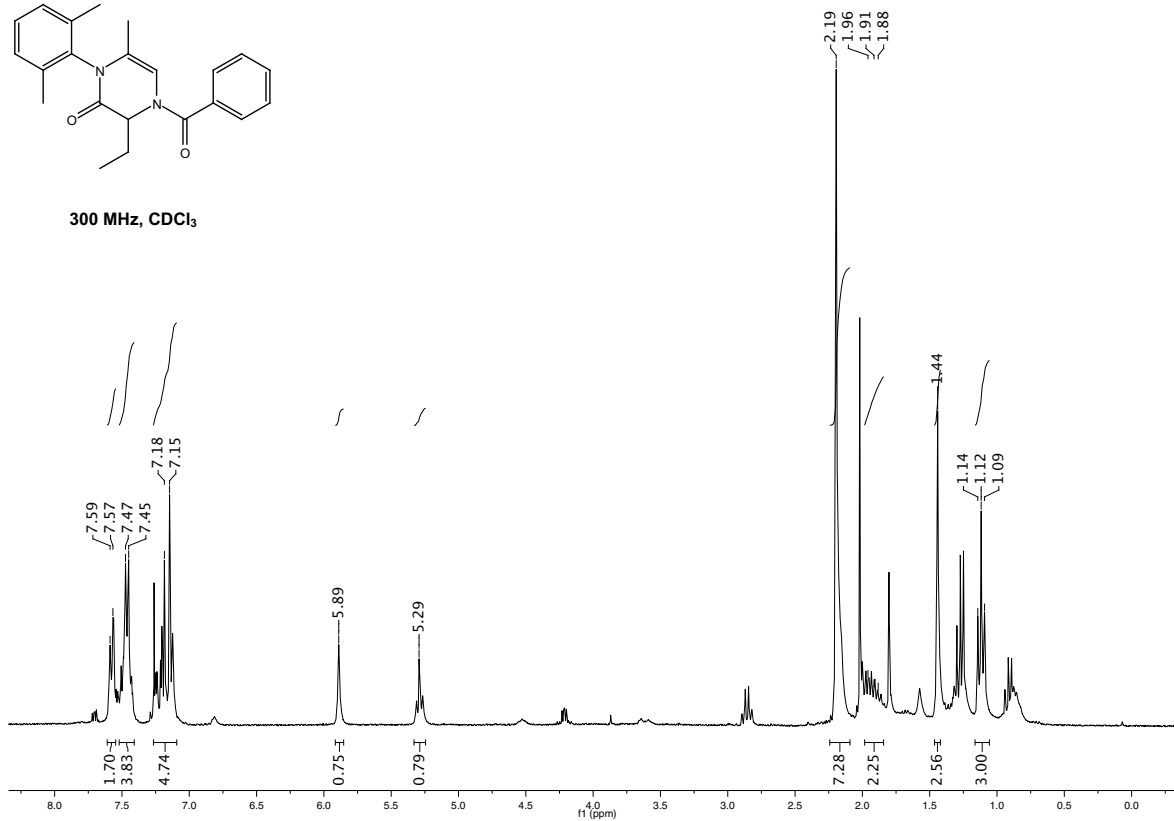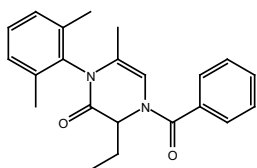75 MHz, CDCl<sub>3</sub>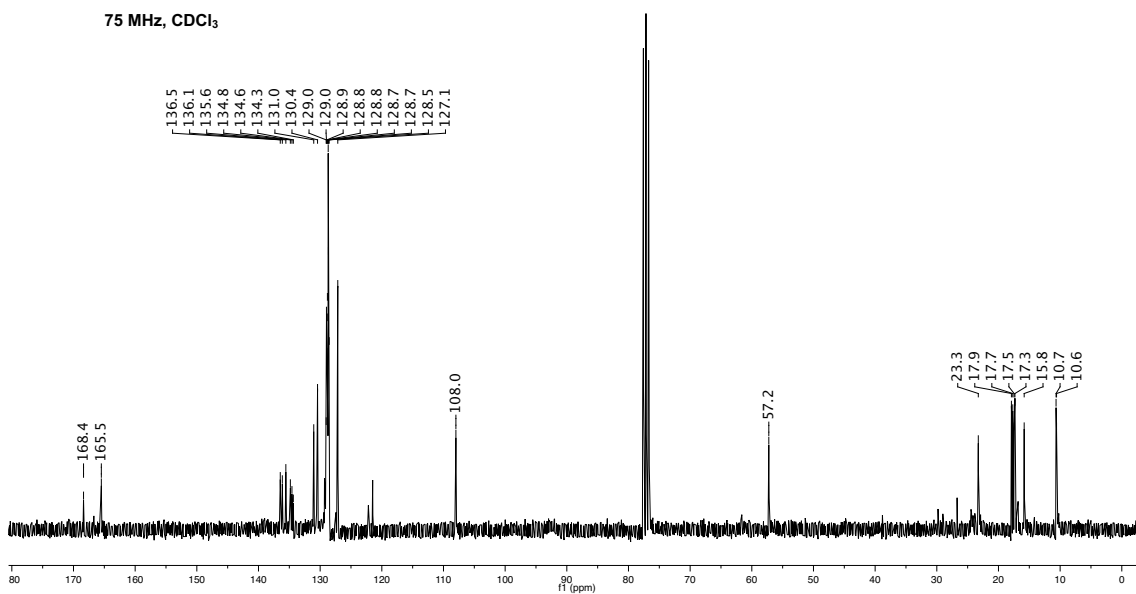

## 4-Acetyl-1-cyclohexyl-3-ethyl-6-methyl-3,4-dihydropyrazin-2(1H)-one (13j)

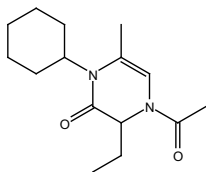300 Mhz, CDCl<sub>3</sub>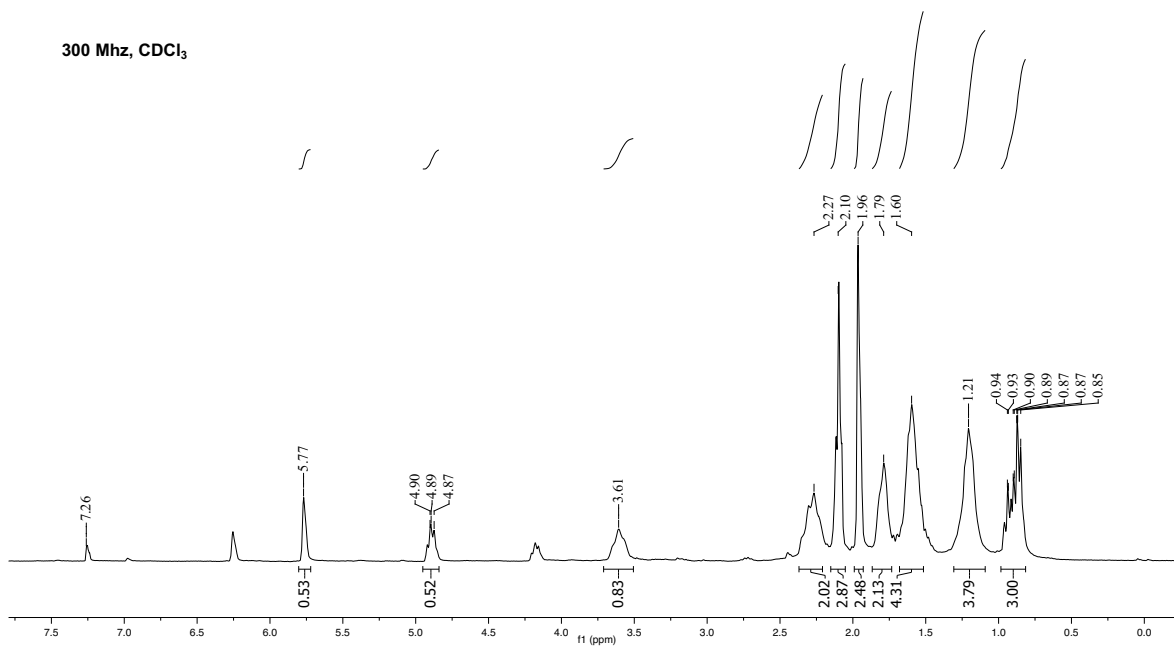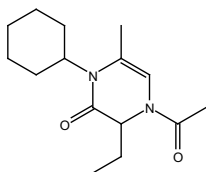75 MHz, CDCl<sub>3</sub>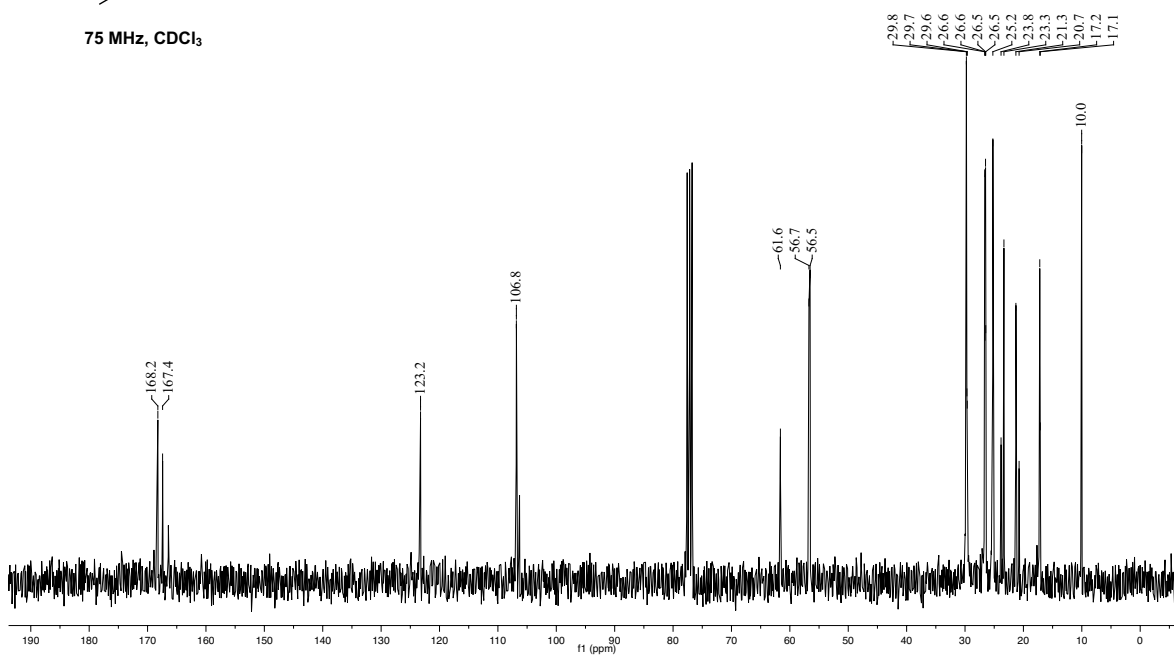

**4-Acetyl-1-cyclohexyl-6-methyl-3-propyl-3,4-dihydropyrazin-2(1H)-one (13k)**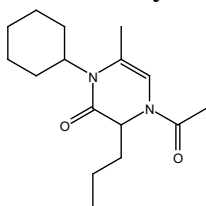300 MHz, CDCl<sub>3</sub>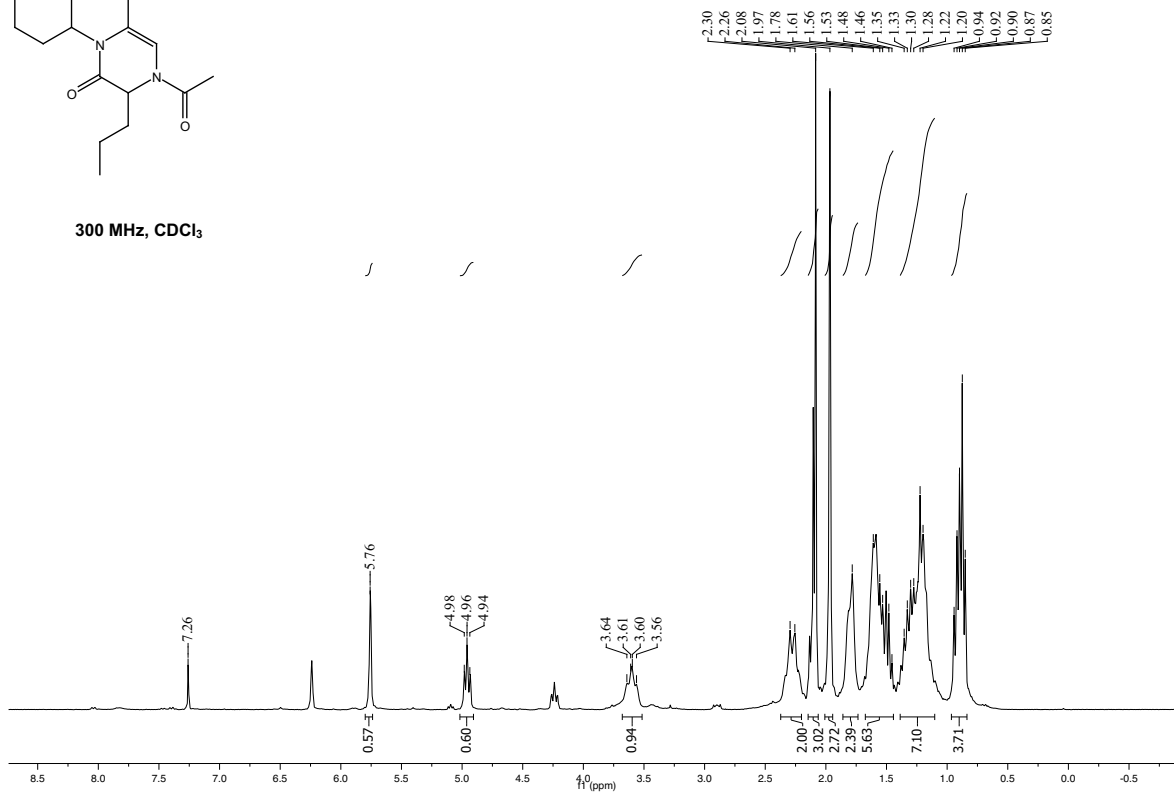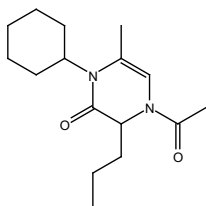75 MHz, CDCl<sub>3</sub>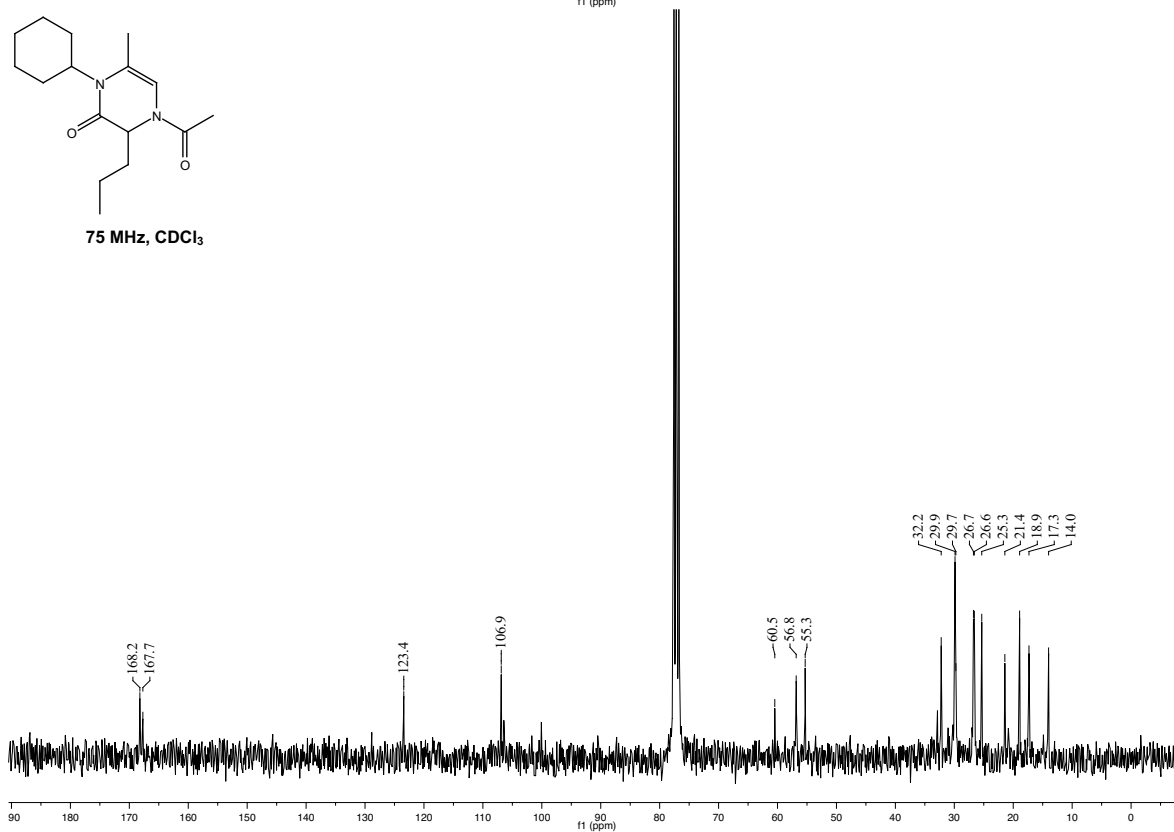



## 4-Acetyl-1-cyclohexyl-3-isopropyl-6-methyl-3,4-dihydropyrazin-2(1H)-one (131)

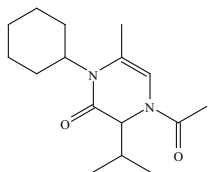300 MHz, CDCl<sub>3</sub>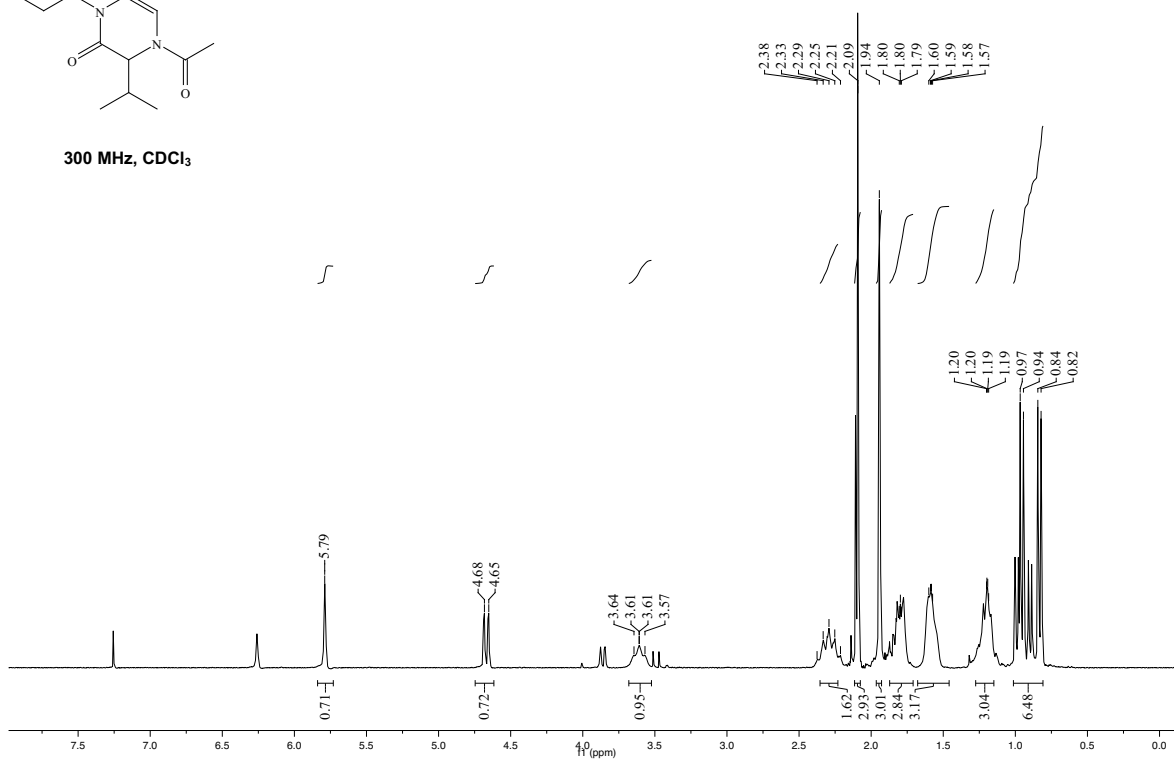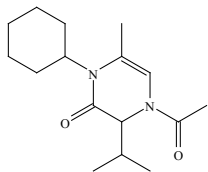75 MHz, CDCl<sub>3</sub>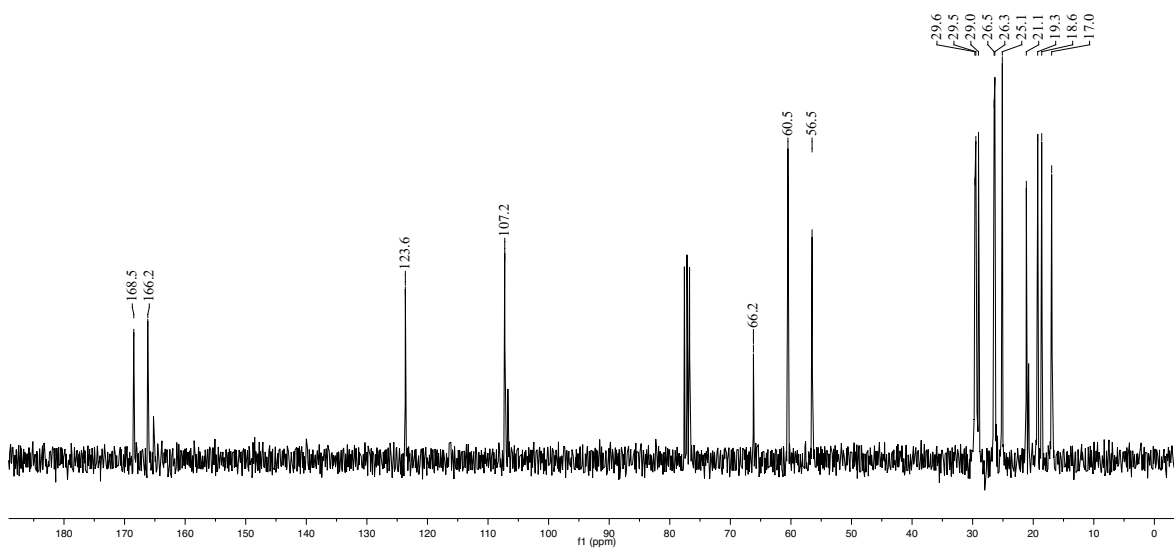

## 4-Acetyl-3-butyl-1-cyclohexyl-6-methyl-3,4-dihydropyrazin-2(1H)-one (13m)

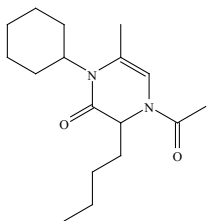300 MHz, CDCl<sub>3</sub>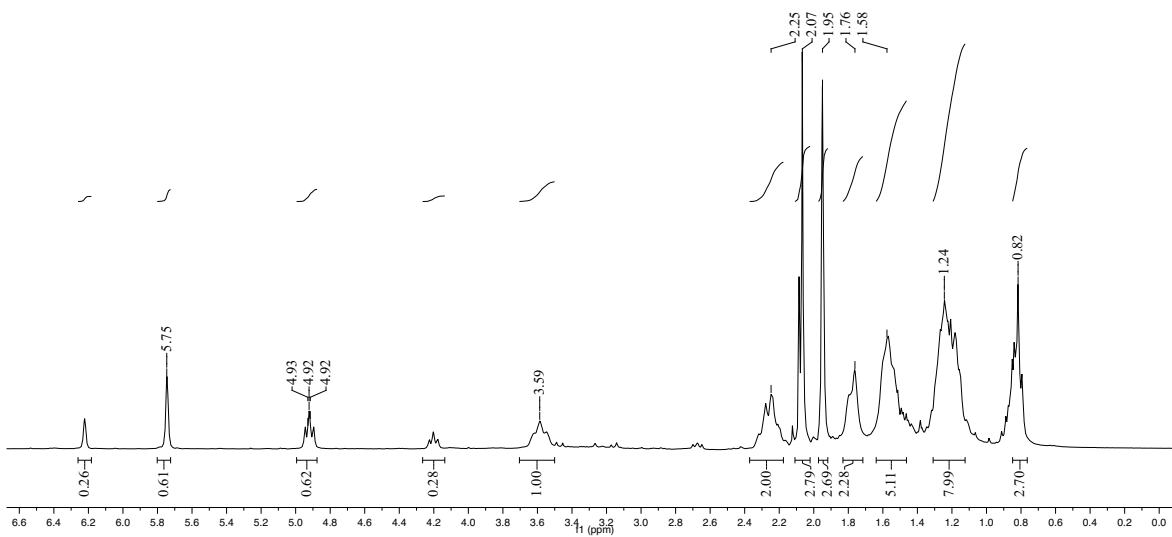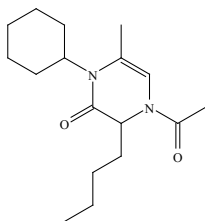75 MHz, CDCl<sub>3</sub>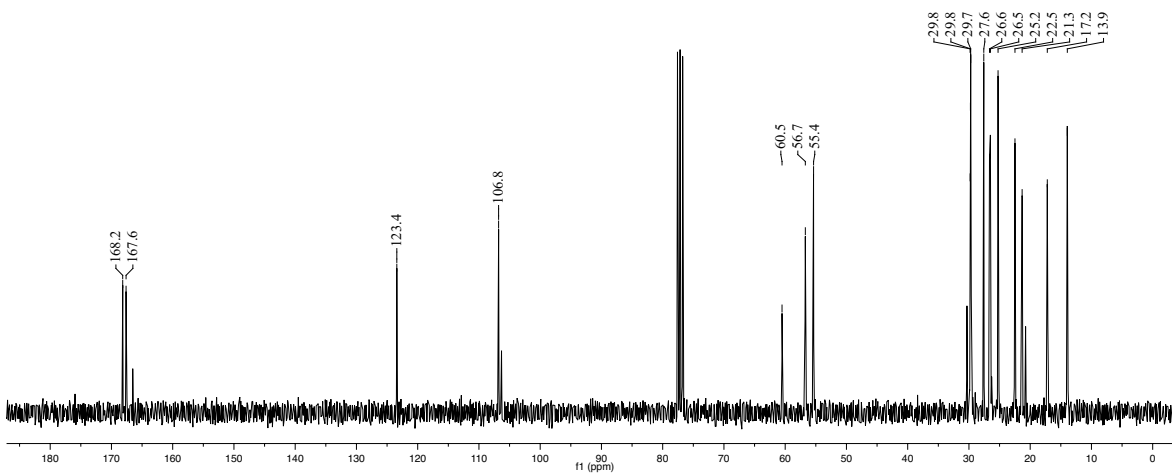

## 4-Benzoyl-1-cyclohexyl-3-ethyl-6-methyl-3,4-dihydropyrazin-2(1H)-one (13n)

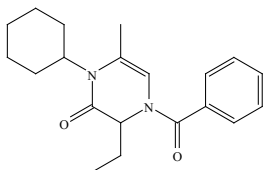300 MHz, CDCl<sub>3</sub>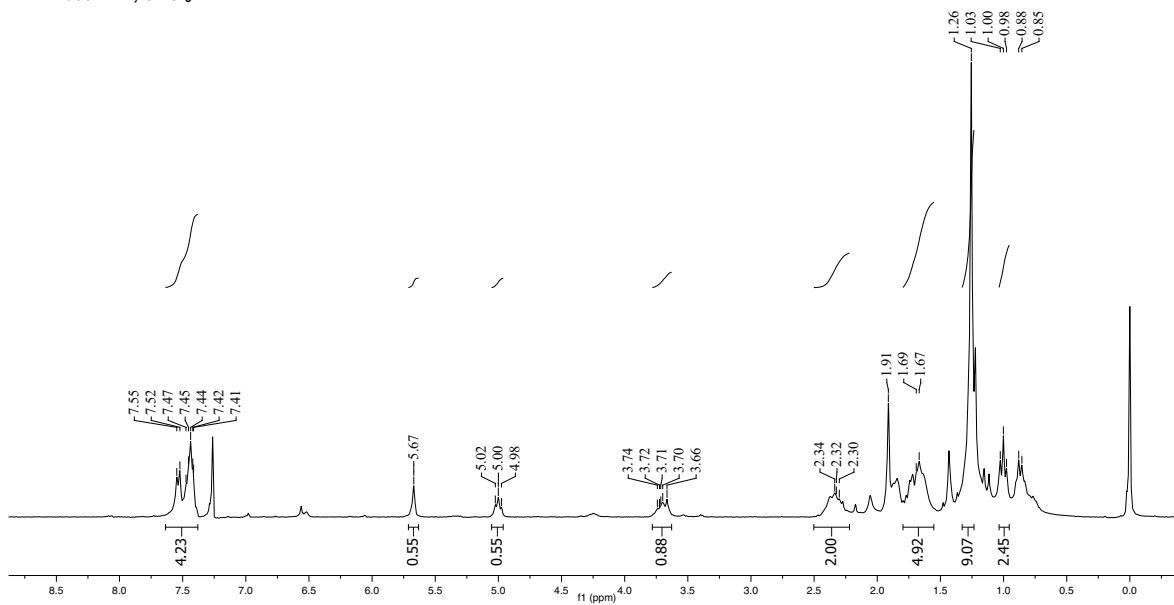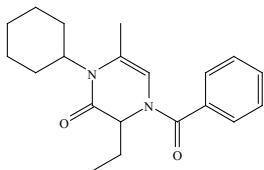75 MHz, CDCl<sub>3</sub>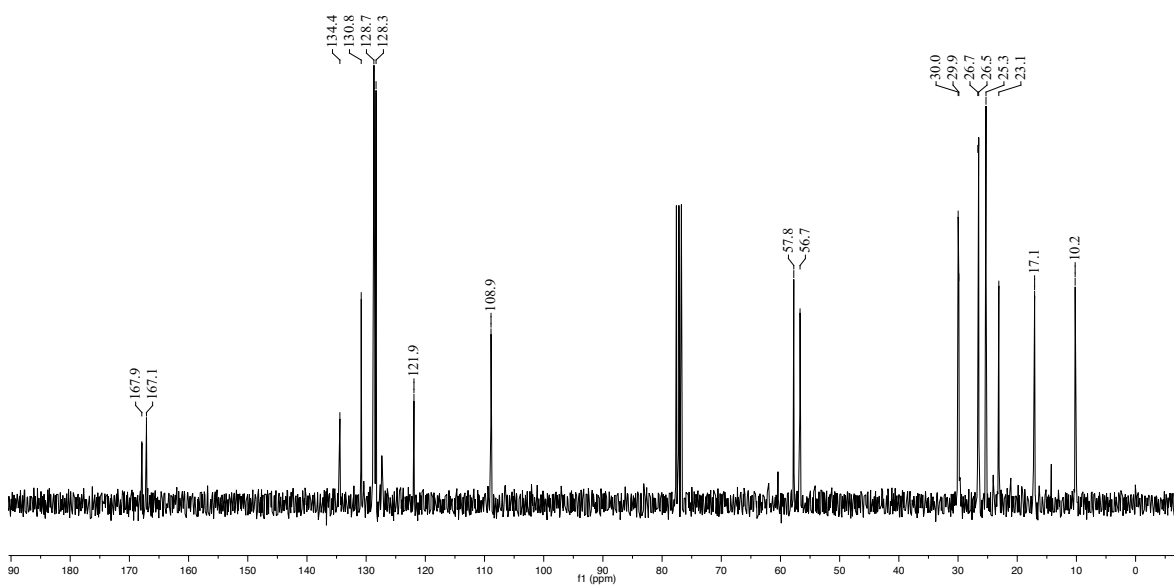

## 4-Benzoyl-1-cyclohexyl-6-methyl-3-propyl-3,4-dihydropyrazin-2(1H)-one (13o)

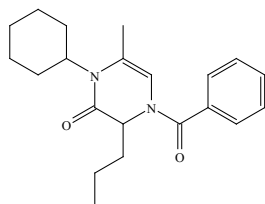300 MHz, CDCl<sub>3</sub>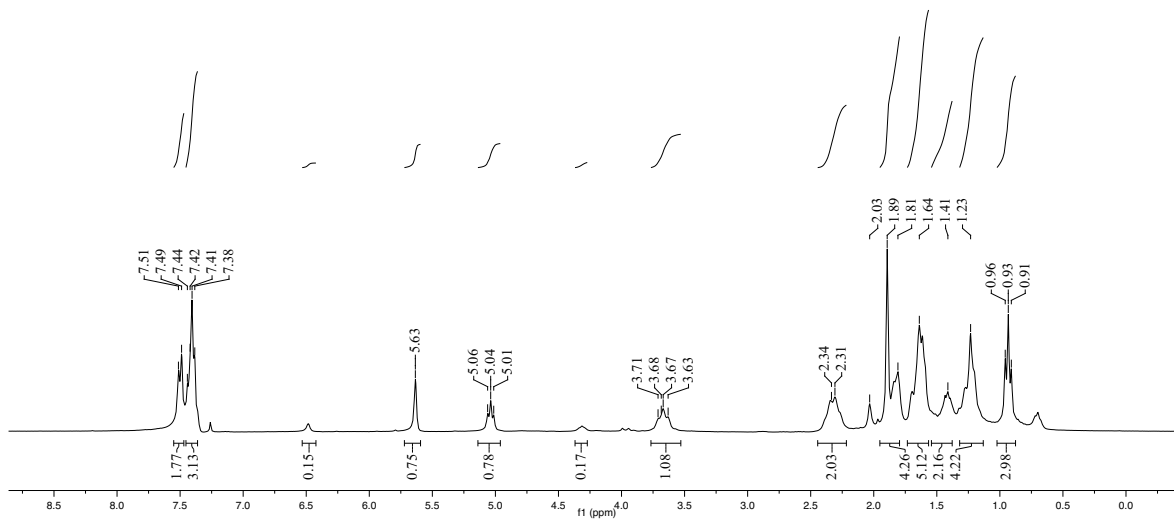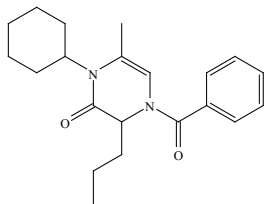75 MHz, CDCl<sub>3</sub>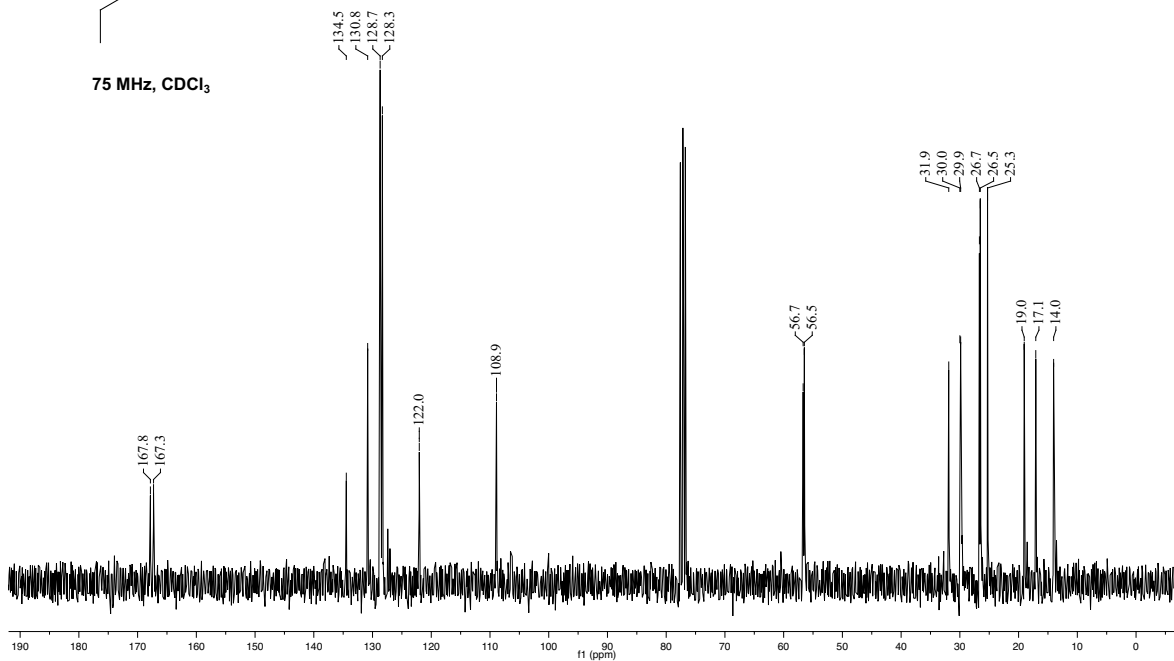

**3-Butyl-1-(2,6-dimethylphenyl)-4-(2-iodobenzoyl)-6-methyl-3,4-dihydropyrazin-2(1H)-one (13p)**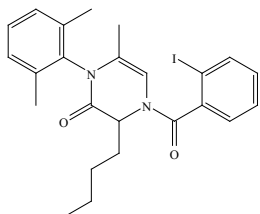300 MHz, CDCl<sub>3</sub>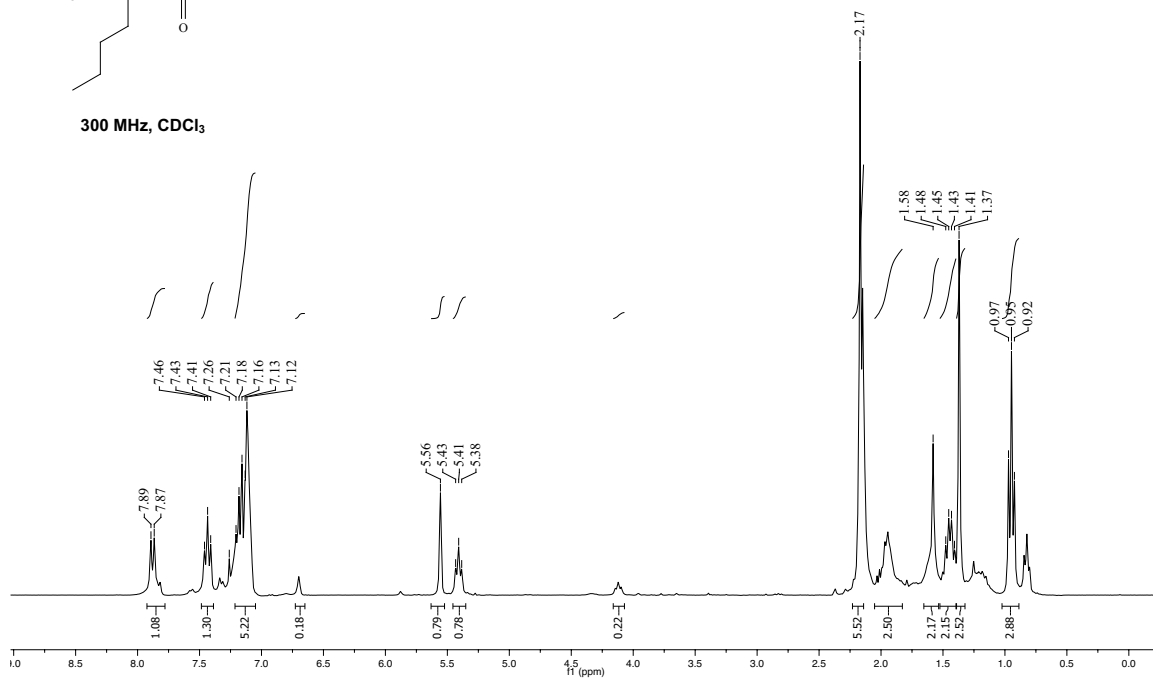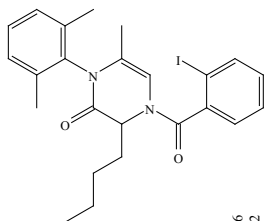75 MHz, CDCl<sub>3</sub>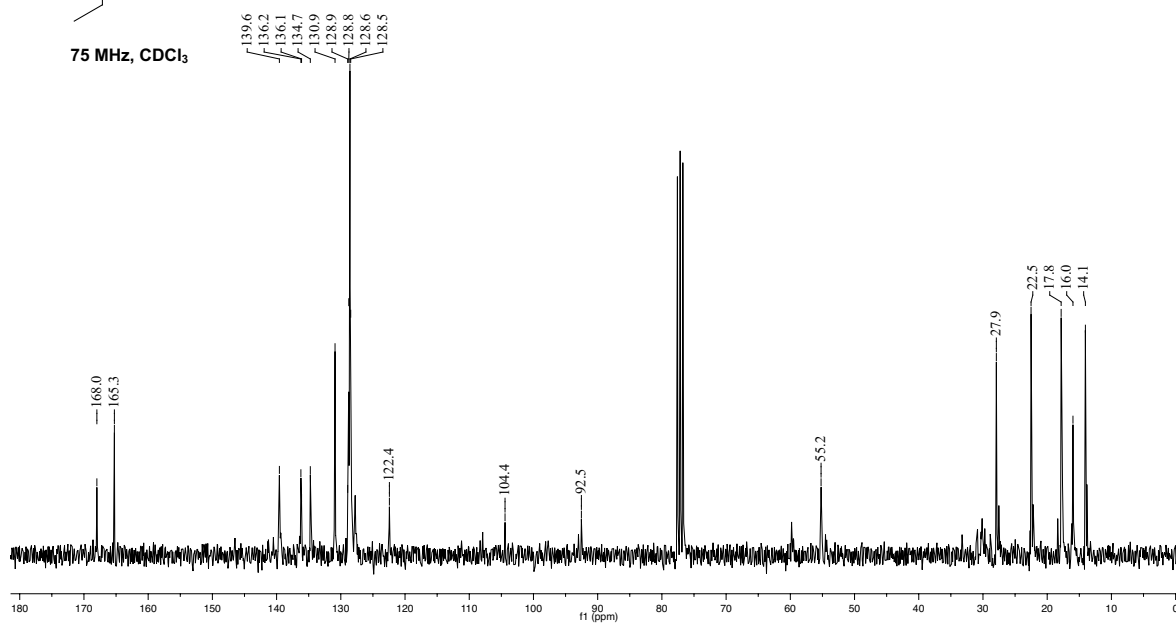

**1-(2,6-Dimethylphenyl)-3-ethyl-4-(2-iodobenzoyl)-6-methyl-3,4-dihydropyrazin-2(1H)-one (13q)**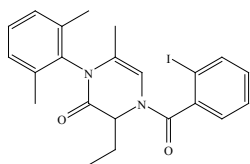400 MHz, CDCl<sub>3</sub>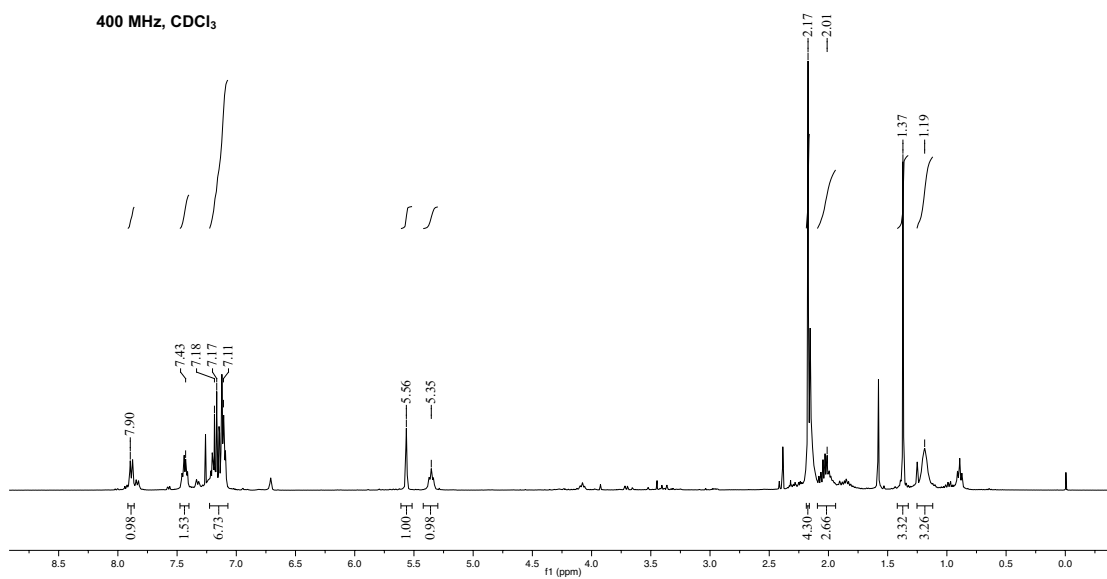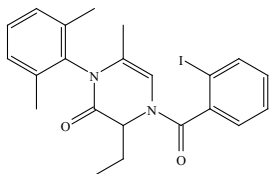100 MHz, CDCl<sub>3</sub>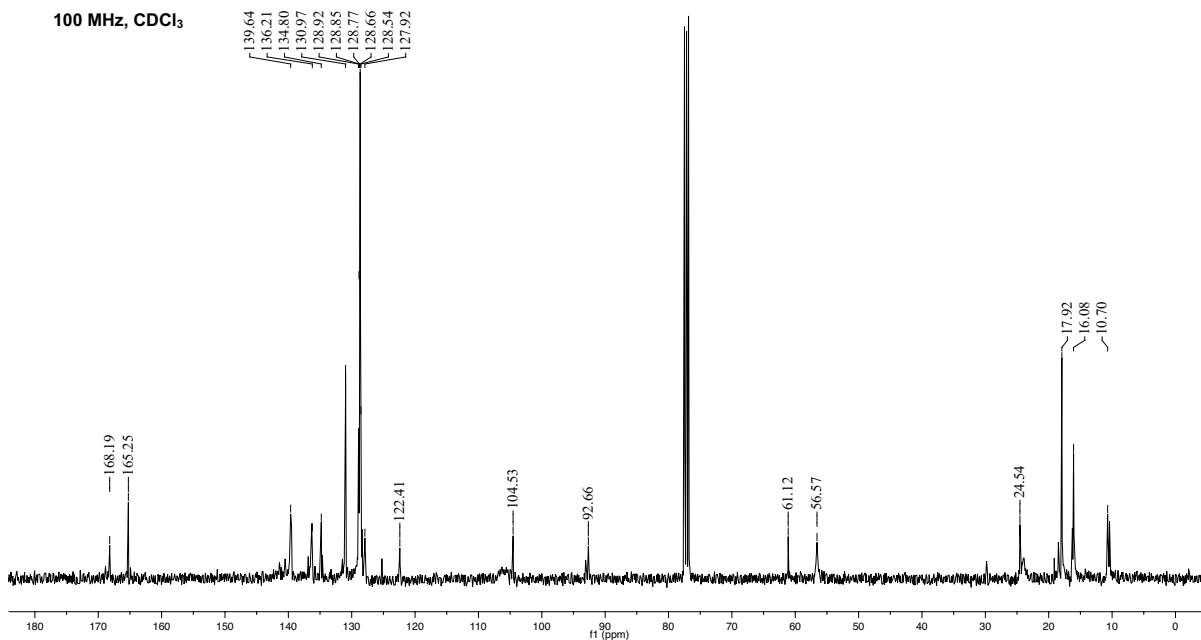

**1-(2,6-Dimethylphenyl)-4-(2-iodobenzoyl)-3,6-dimethyl-3,4-dihydropyrazin-2(1H)-one (13r).**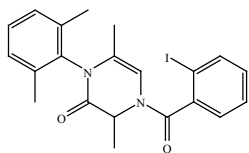300 MHz, CDCl<sub>3</sub>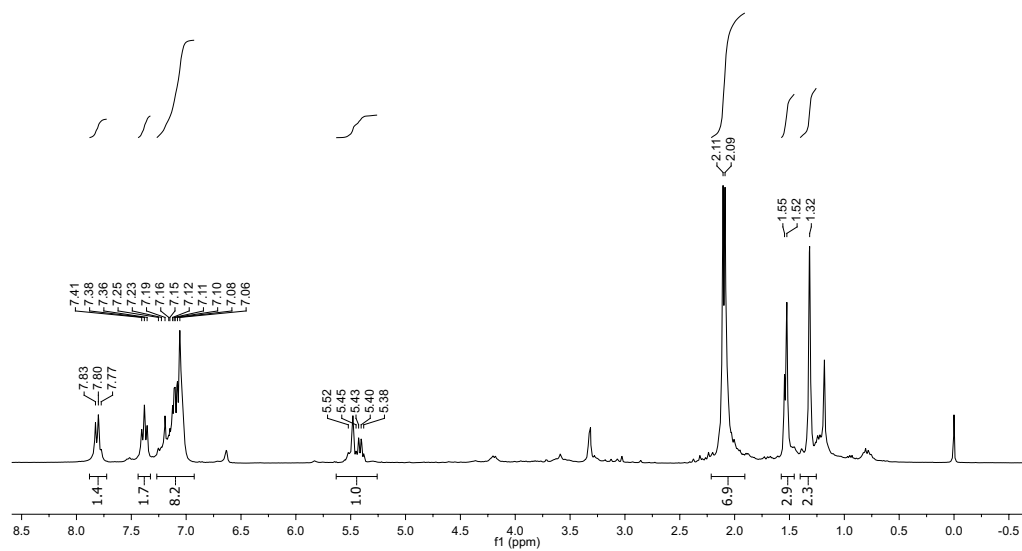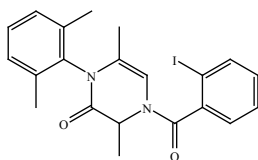75 MHz, CDCl<sub>3</sub>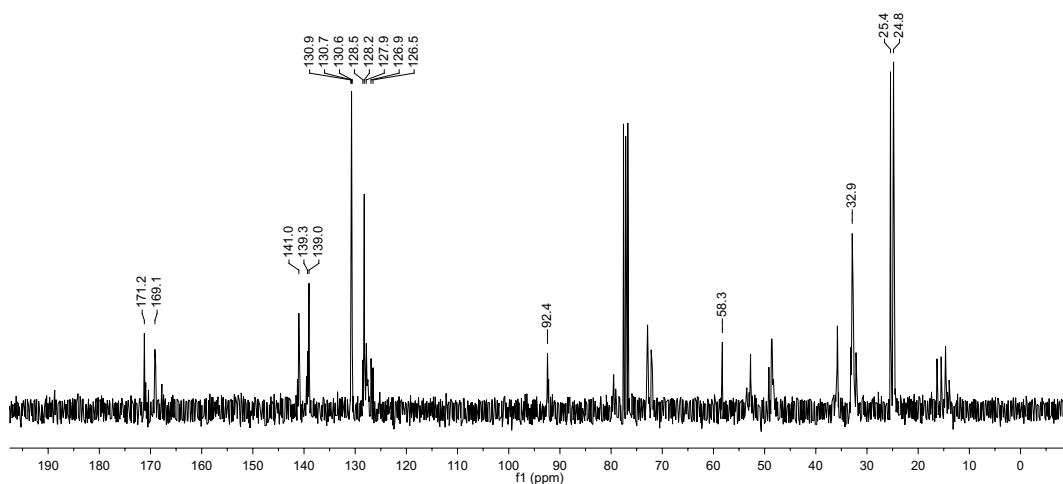

**3-Butyl-1-cyclohexyl-4-(2-iodobenzoyl)-6-methyl-3,4-dihydropyrazin-2(1H)-one (13s)**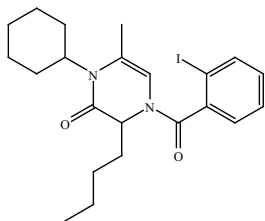300 MHz, CDCl<sub>3</sub>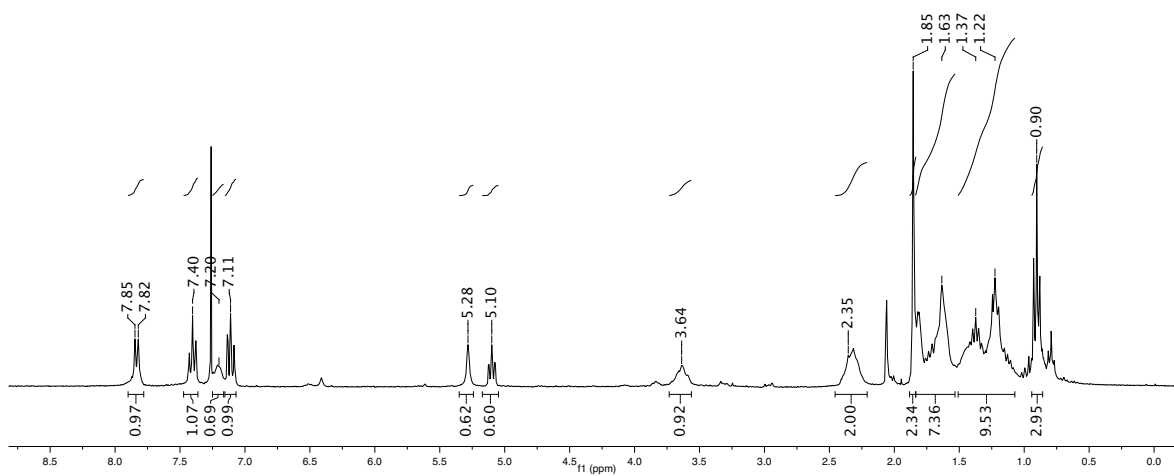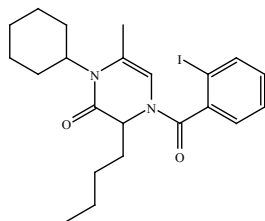75 MHz, CDCl<sub>3</sub>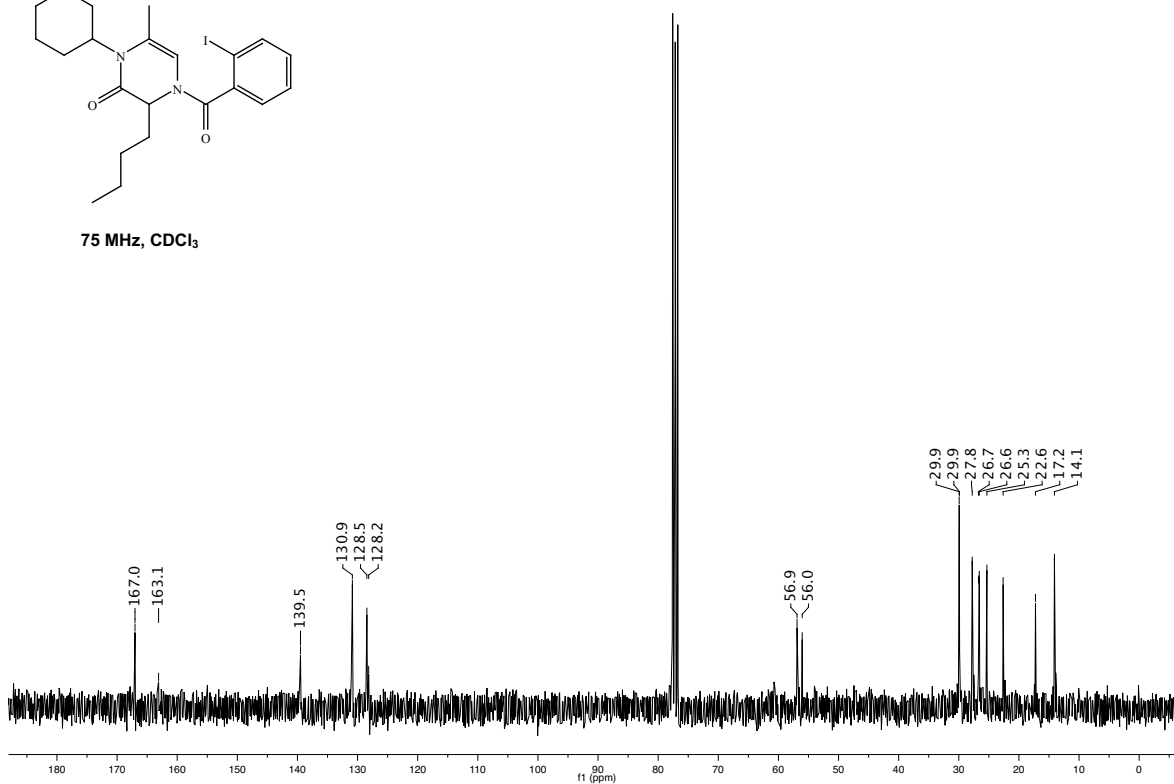



**1-Cyclohexyl-4-(2-iodobenzoyl)-3,6-dimethyl-3,4-dihydropyrazin-2(1H)-one (13t)**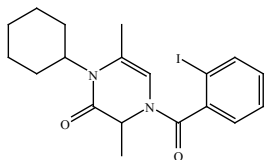400 MHz, CDCl<sub>3</sub>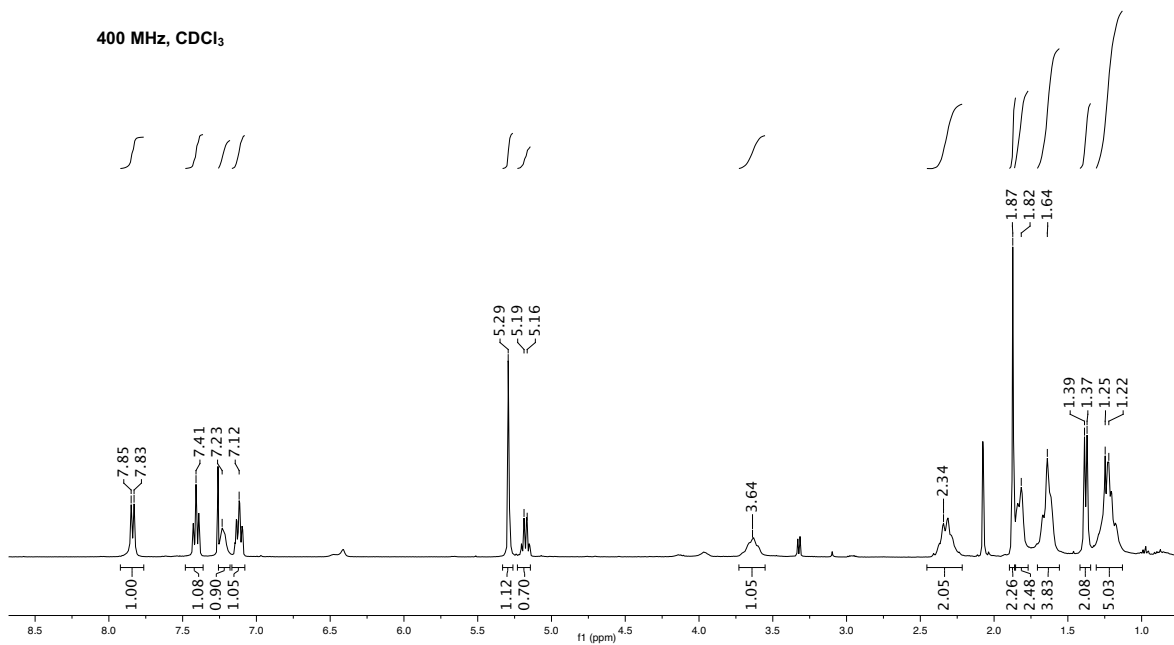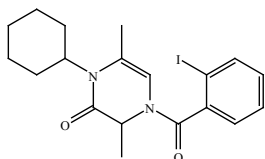100 MHz, CDCl<sub>3</sub>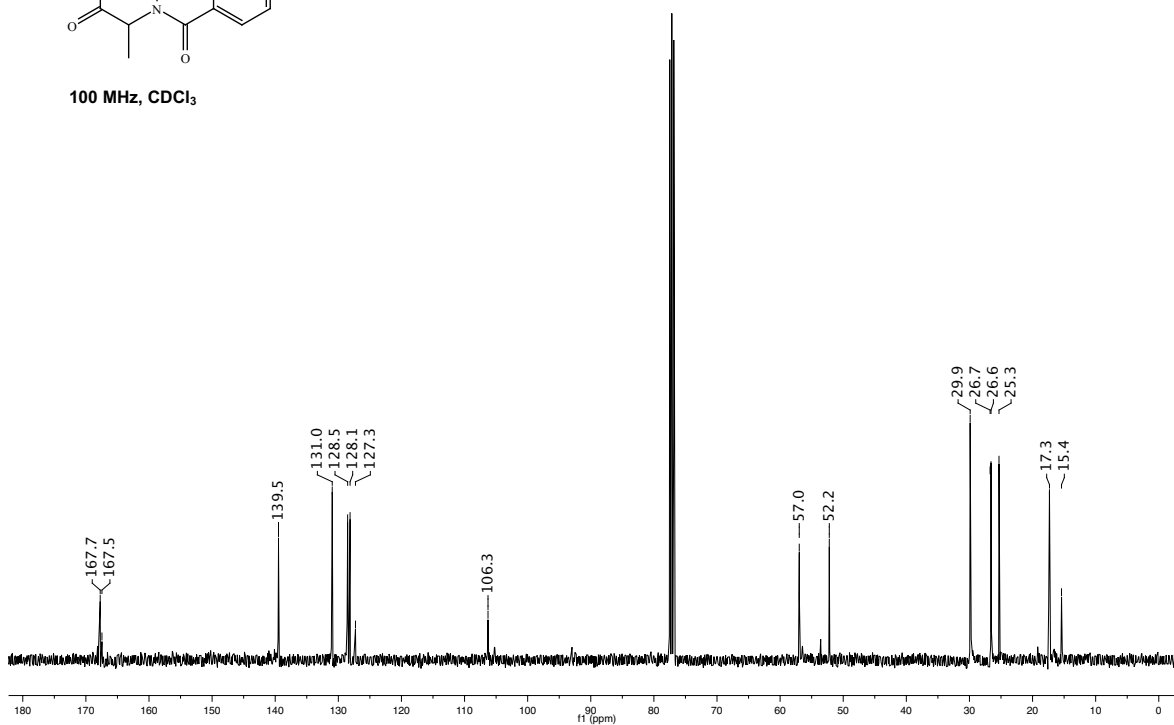

**1-(*Tert*-butyl)-3-ethyl-4-(2-iodobenzoyl)-6-methyl-3,4-dihydropyrazin-2(1*H*)-one (13u)**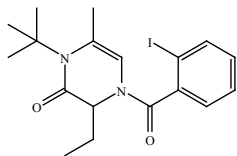300 MHz, CDCl<sub>3</sub>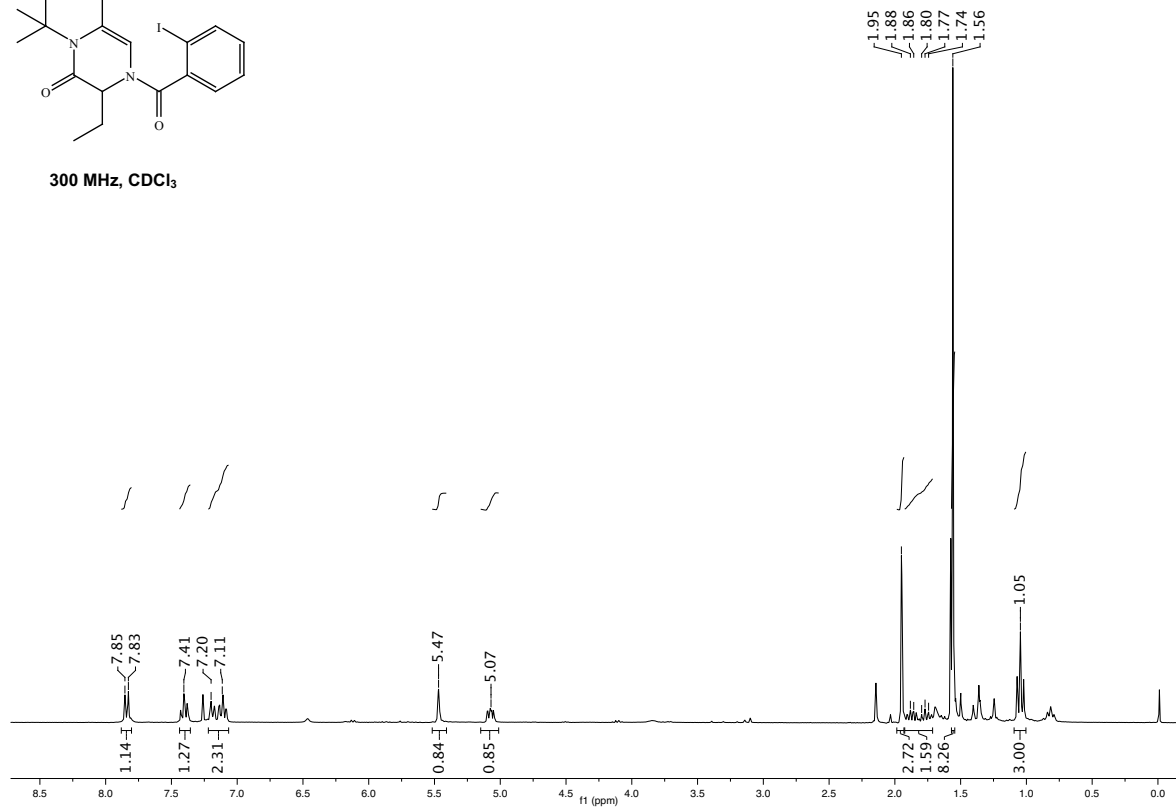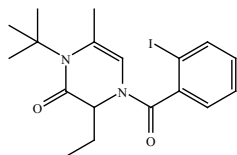75 MHz, CDCl<sub>3</sub>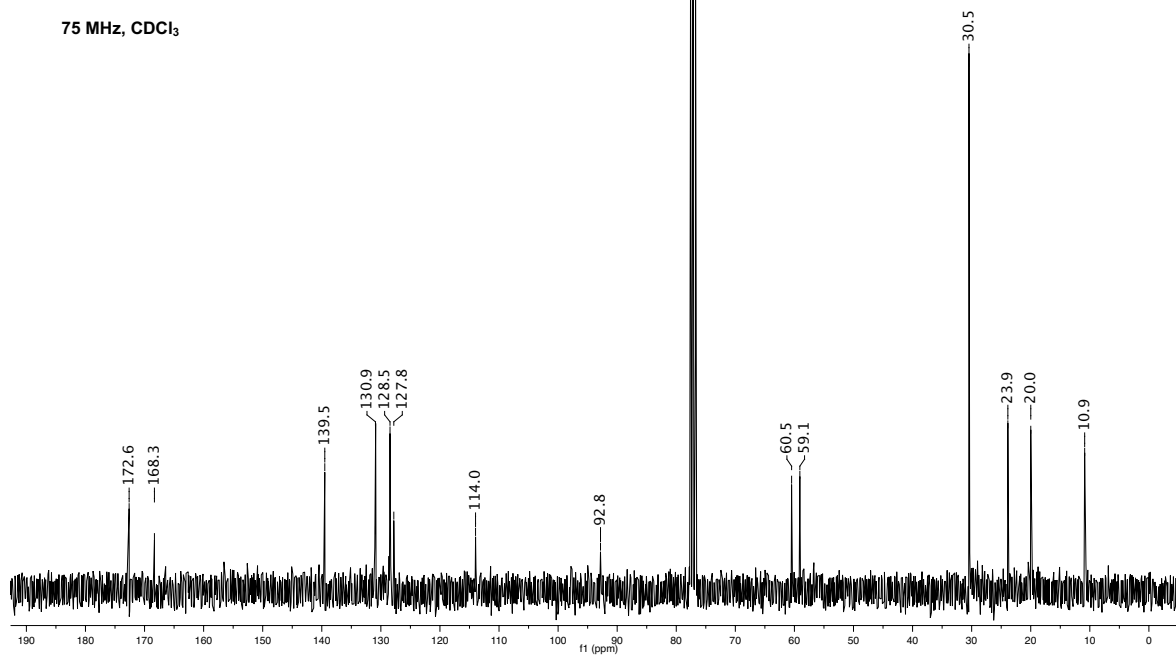

**1-Benzyl-4-(2-iodobenzoyl)-3-isopropyl-6-methyl-3,4-dihydropyrazin-2(1H)-one (13v)**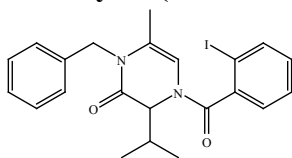300 MHz, CDCl<sub>3</sub>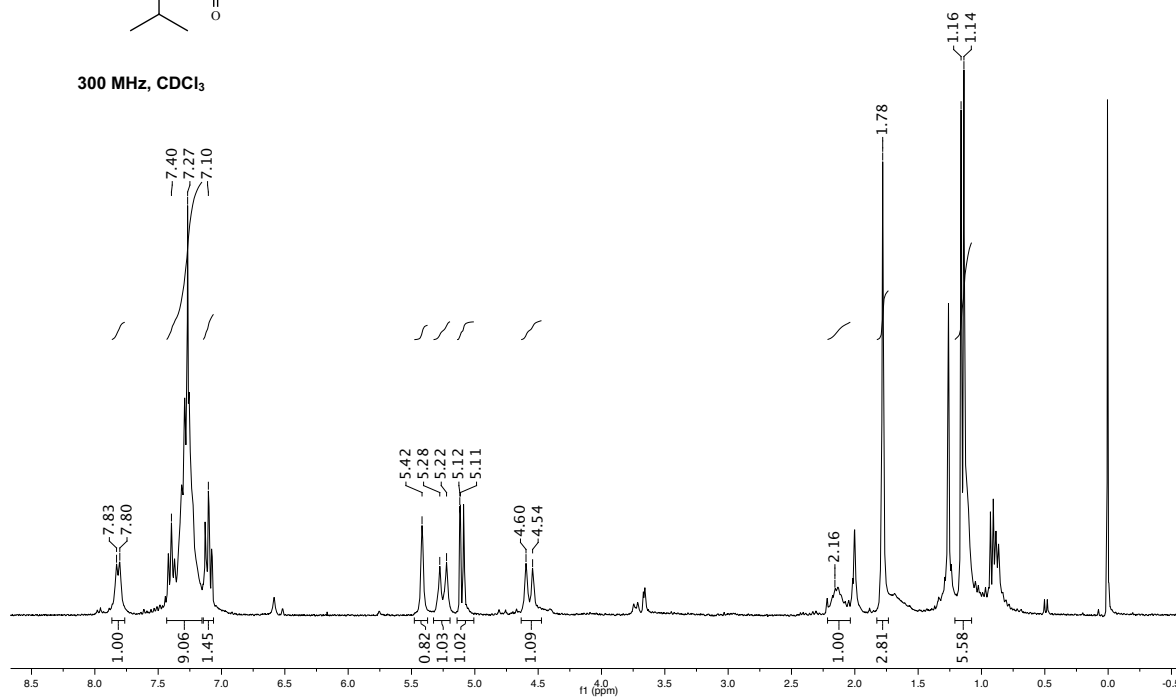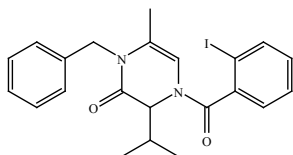75 MHz, CDCl<sub>3</sub>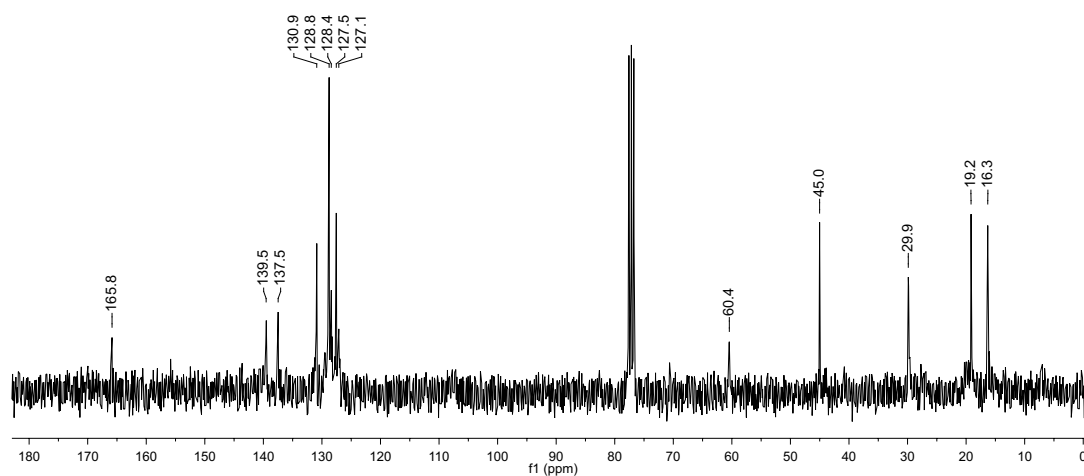

**3-Ethyl-4-(2-iodobenzoyl)-6-methyl-1-(naphthalen-2-yl)-3,4-dihydropyrazin-2(1H)-one (13w)**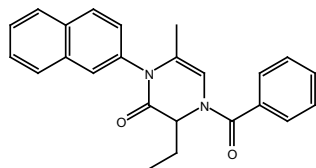300 MHz, CDCl<sub>3</sub>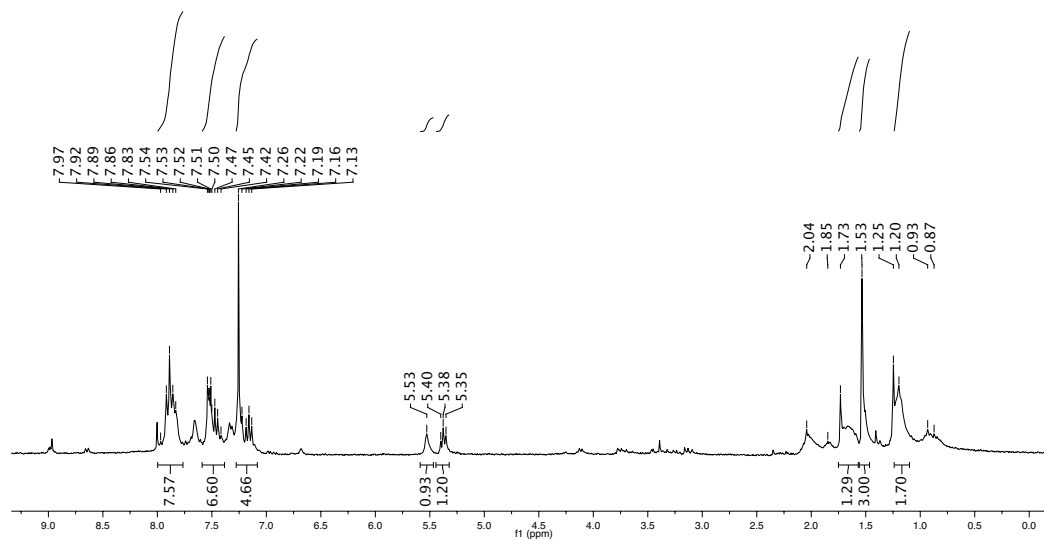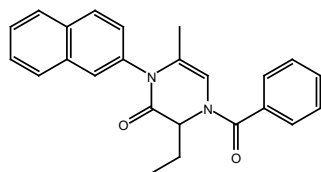75 MHz, CDCl<sub>3</sub>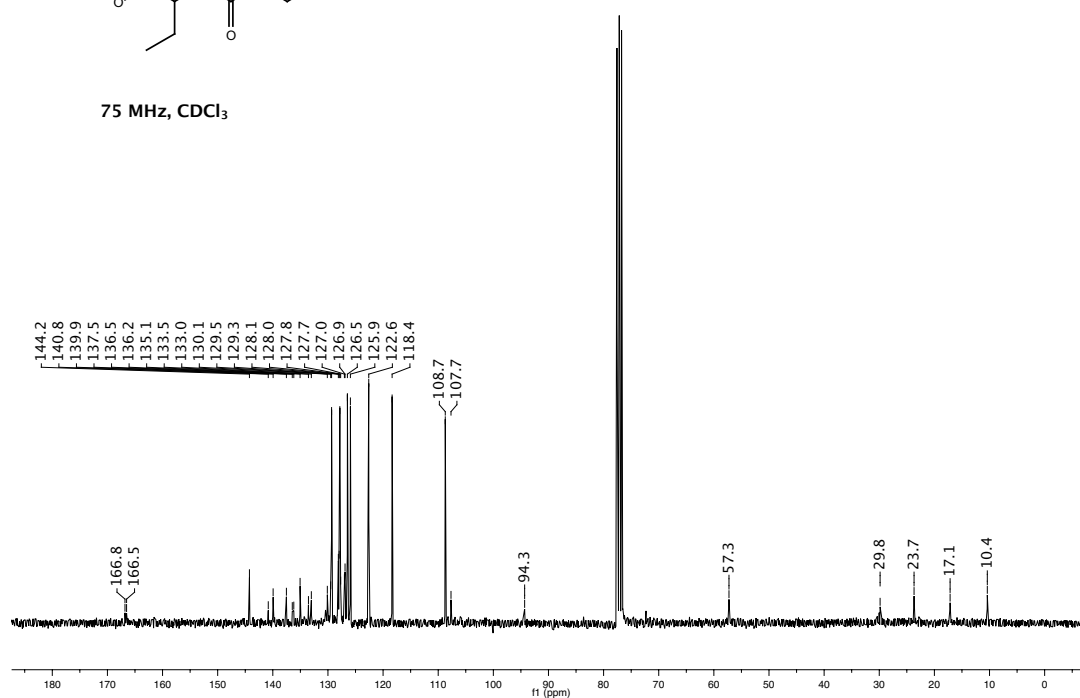

**3-Ethyl-4-(2-(2-iodophenyl)acetyl)-1-(4-methoxyphenyl)-6-methyl-3,4-dihydropyrazin-2(1H)-one (13x)**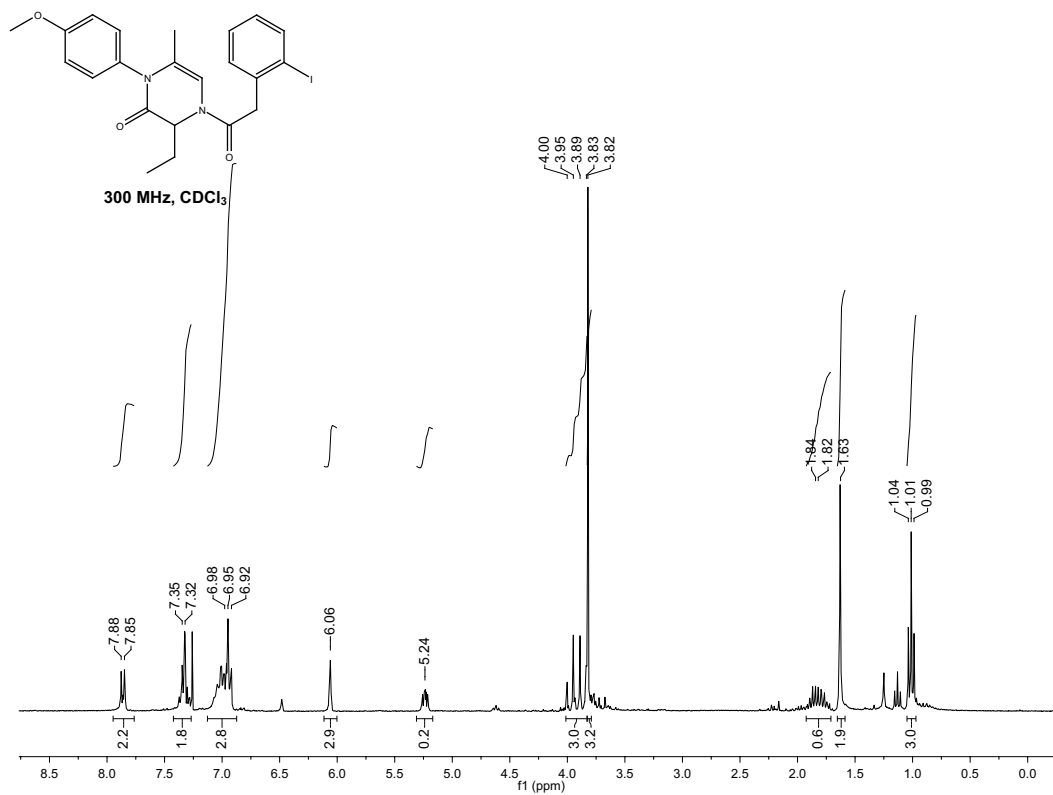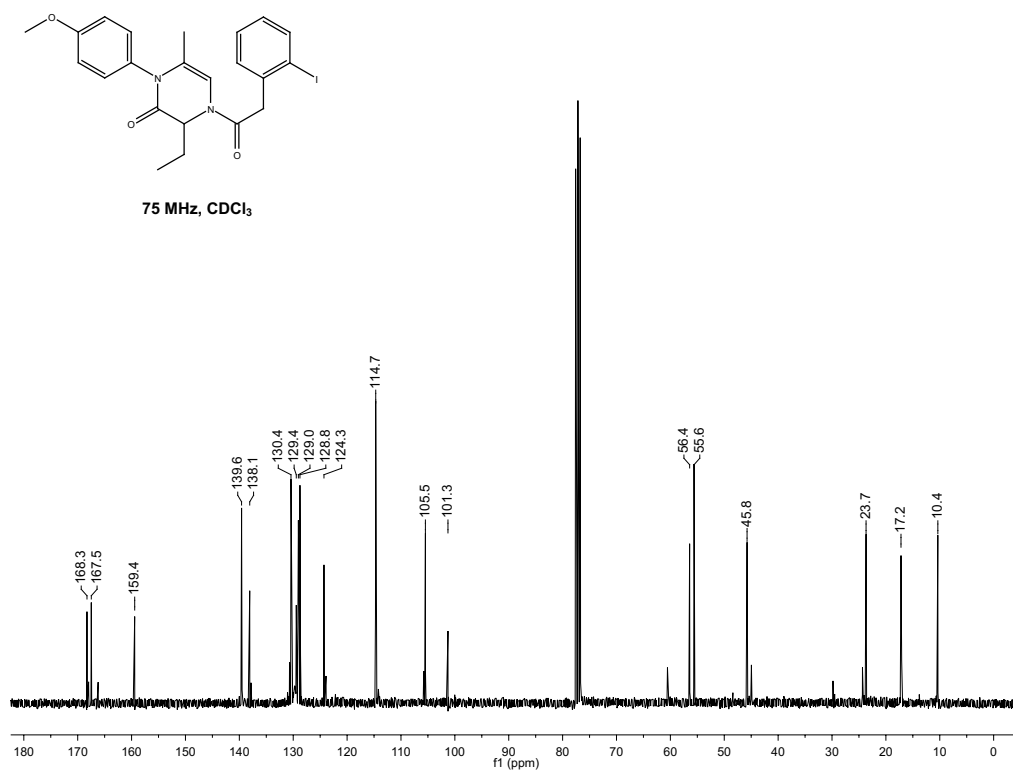

**1-Acetyl-2-(4-chlorophenyl)-*N*-cyclohexyl-2,5-dihydro-1*H*-pyrrole-2-carboxamide  
(12y)**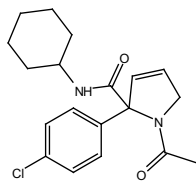300 MHz, CDCl<sub>3</sub>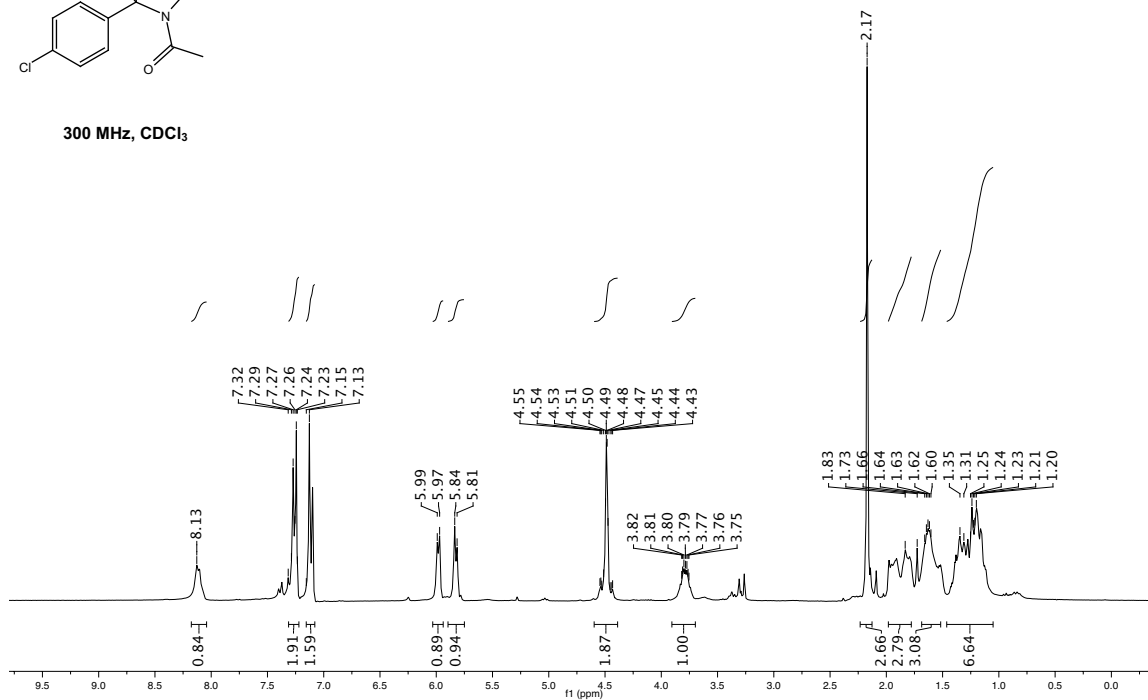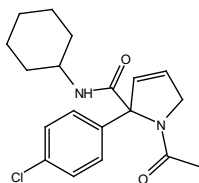75 MHz, CDCl<sub>3</sub>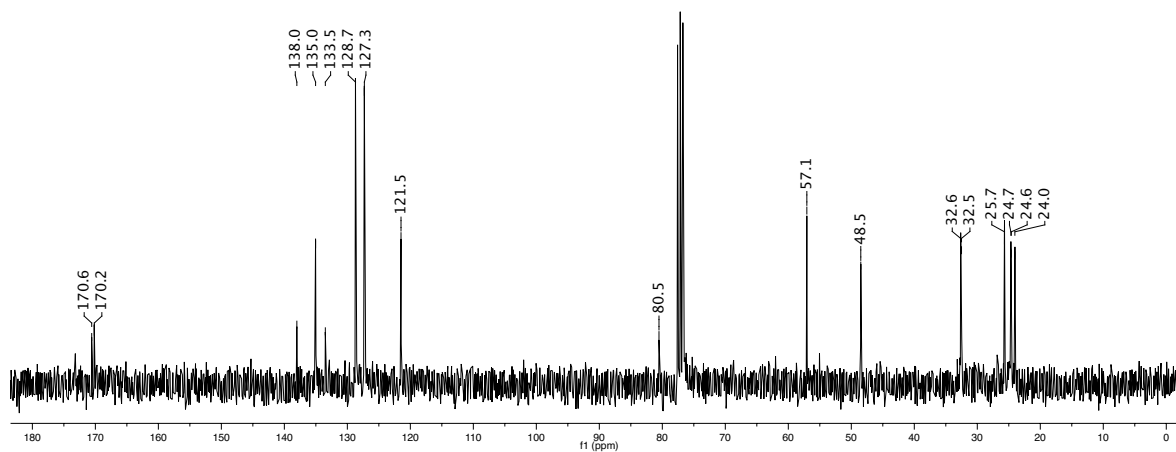

## Tricyclic pyrazinone spectra

2-(2,6-Dimethylphenyl)-4-ethyl-1-methylpyrazino[2,1-*a*]isoindole-3,6(2*H*,4*H*)-dione  
(14q)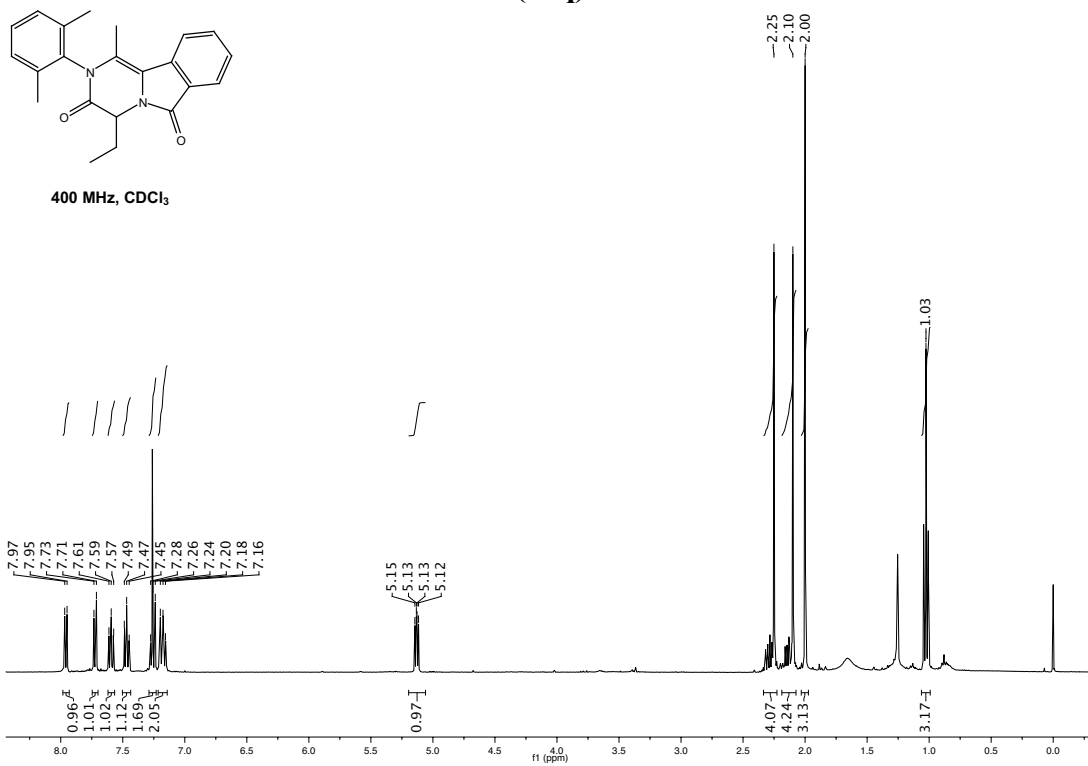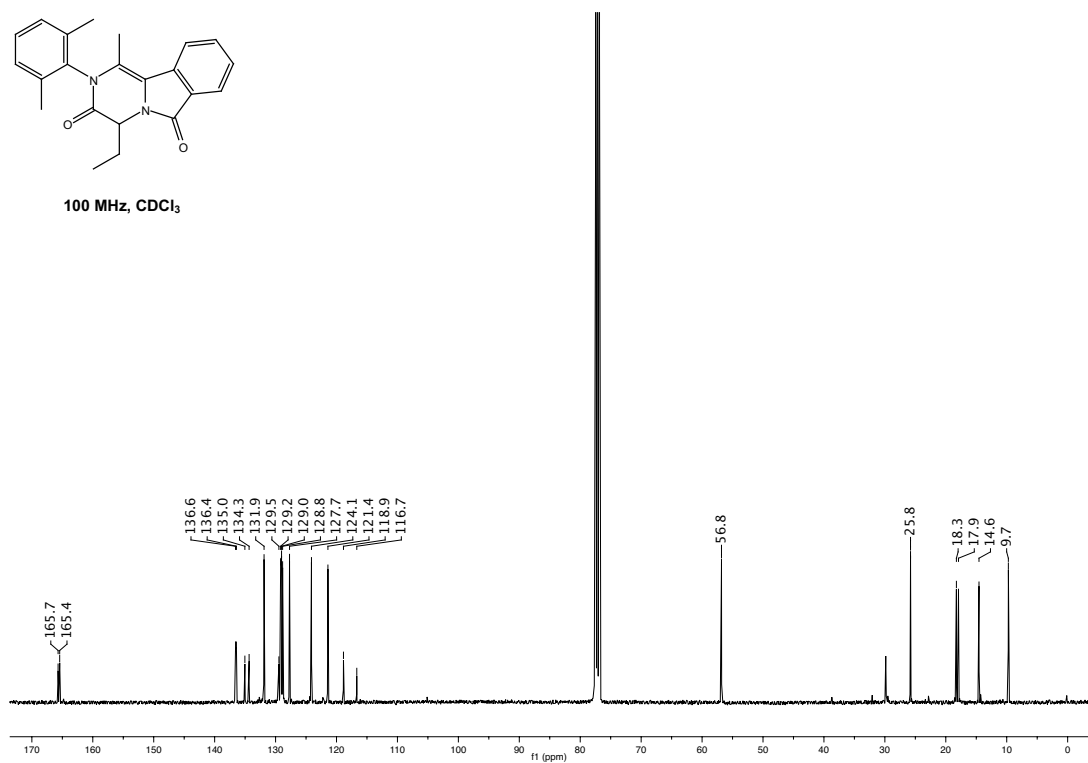

**2-(2,6-Dimethylphenyl)-1,4-dimethylpyrazino[2,1-*a*]isoindole-3,6(2*H*,4*H*)-dione (14r)**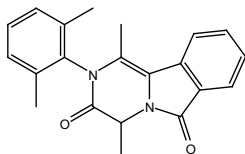300 MHz, CDCl<sub>3</sub>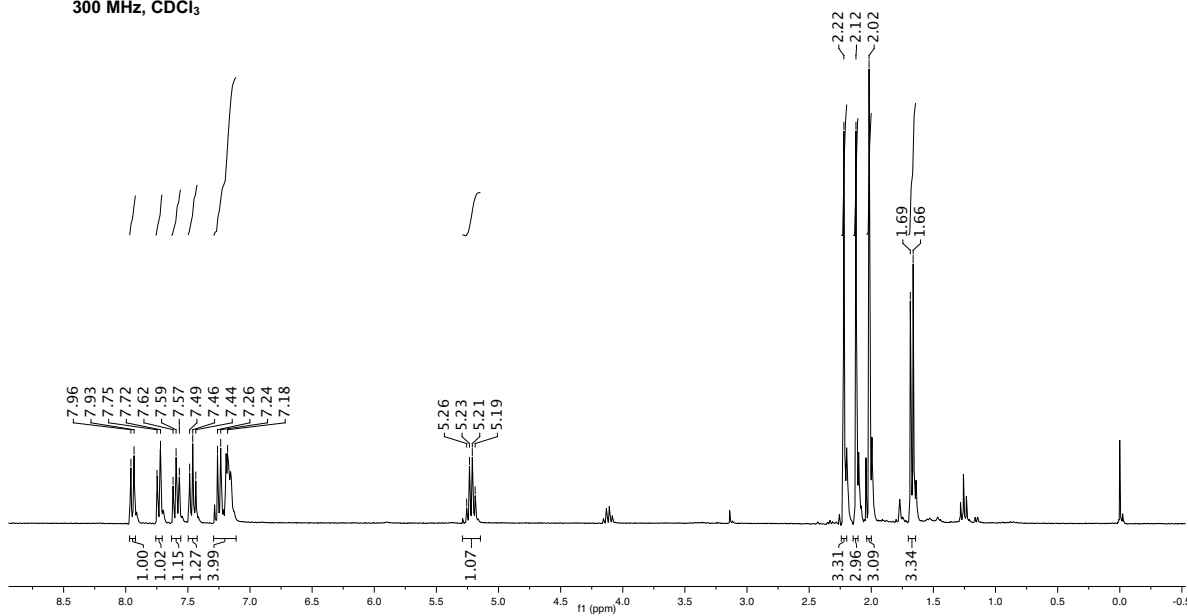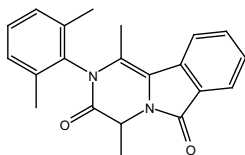75 MHz, CDCl<sub>3</sub>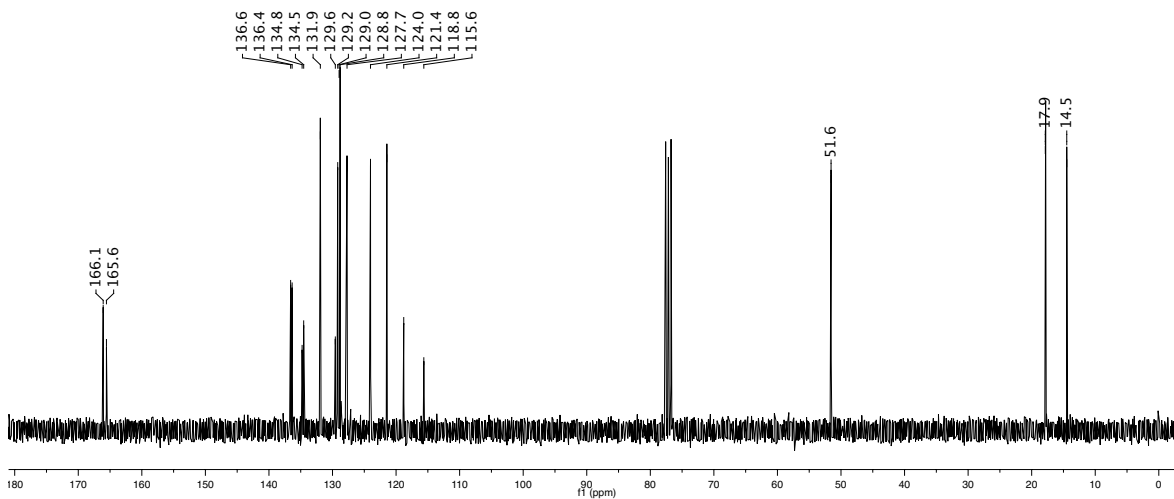



4-Butyl-2-cyclohexyl-1-methylpyrazino[2,1-*a*]isoindole-3,6(2*H*,4*H*)-dione (14s)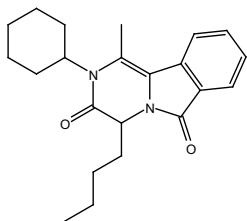300 MHz, CDCl<sub>3</sub>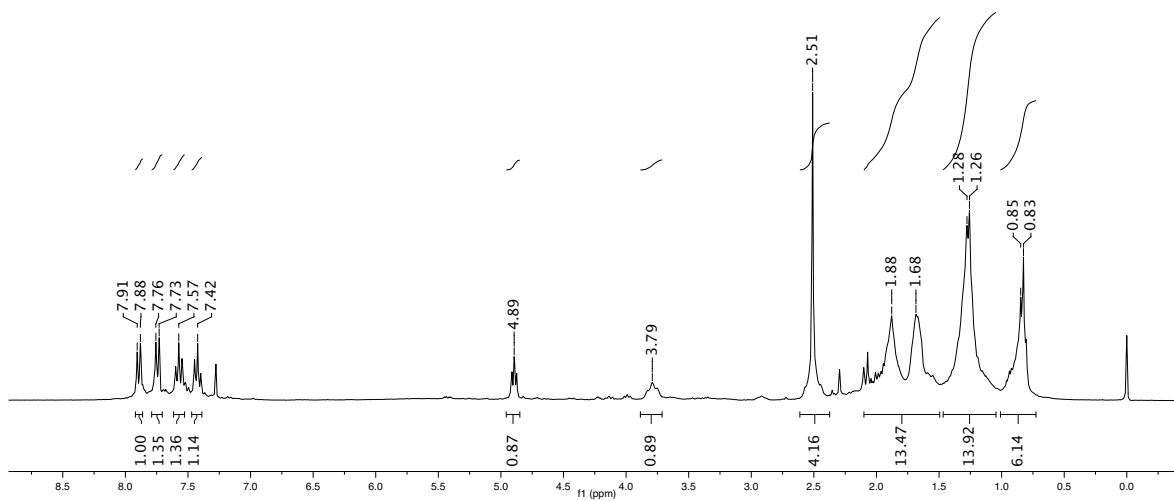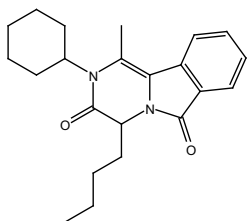75 MHz, CDCl<sub>3</sub>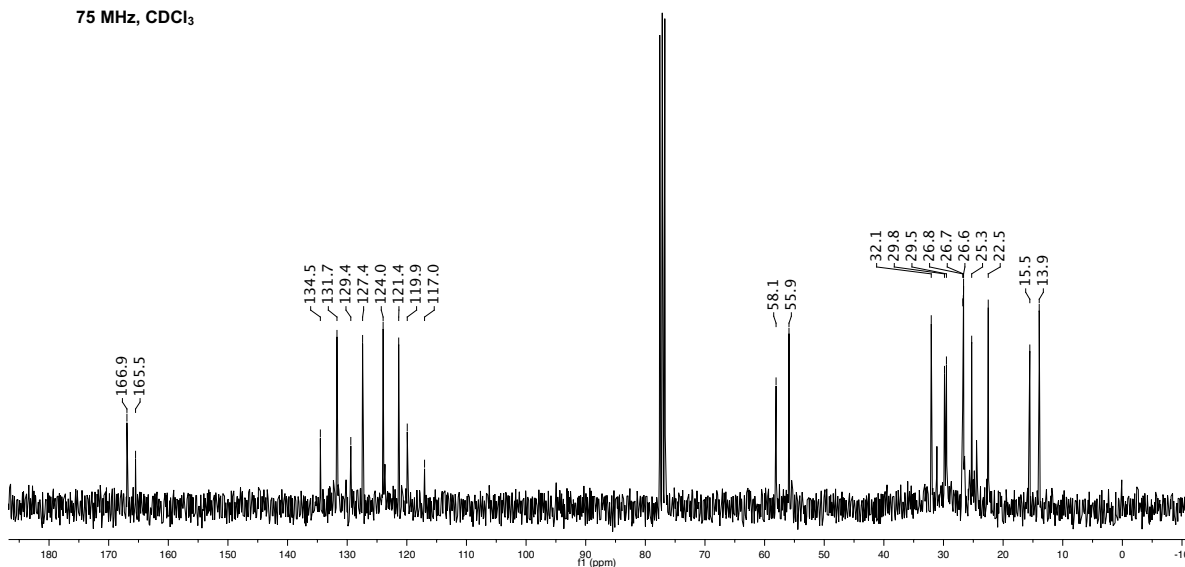

2-Cyclohexyl-1,4-dimethylpyrazino[2,1-*a*]isoindole-3,6(2*H*,4*H*)-dione (14t)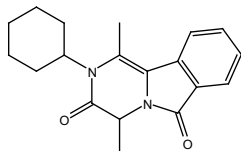400 MHz, CDCl<sub>3</sub>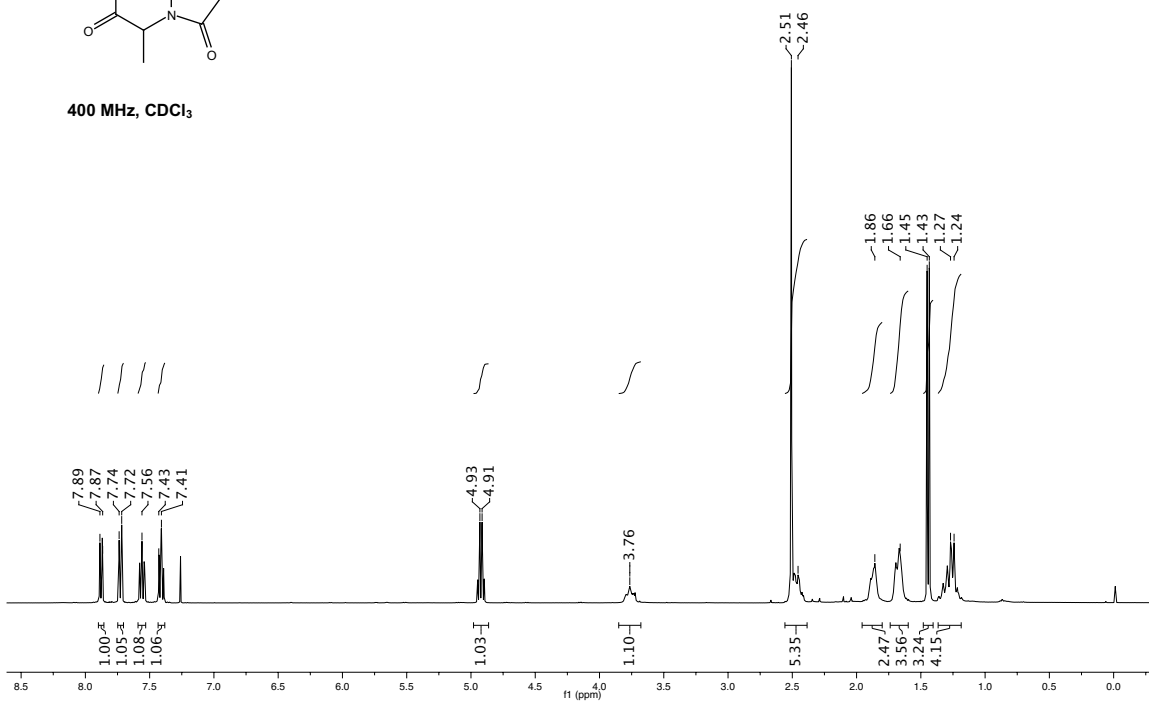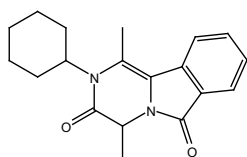100 MHz, CDCl<sub>3</sub>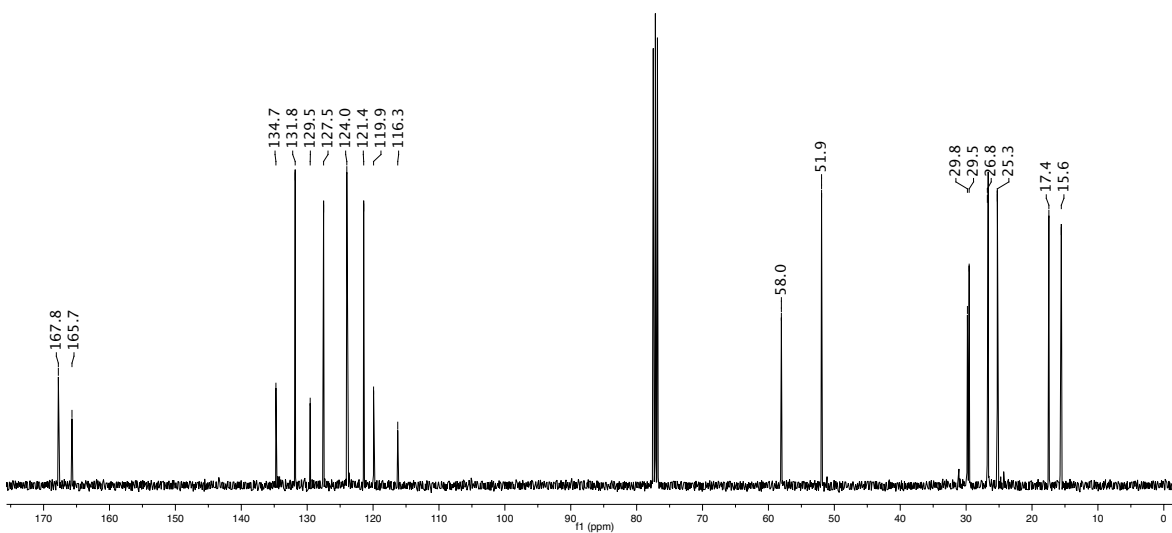

**2-(*Tert*-butyl)-4-ethyl-1-methylpyrazino[2,1-*a*]isoindole-3,6(2*H*,4*H*)-dione (14u)**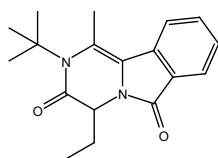300 MHz, CDCl<sub>3</sub>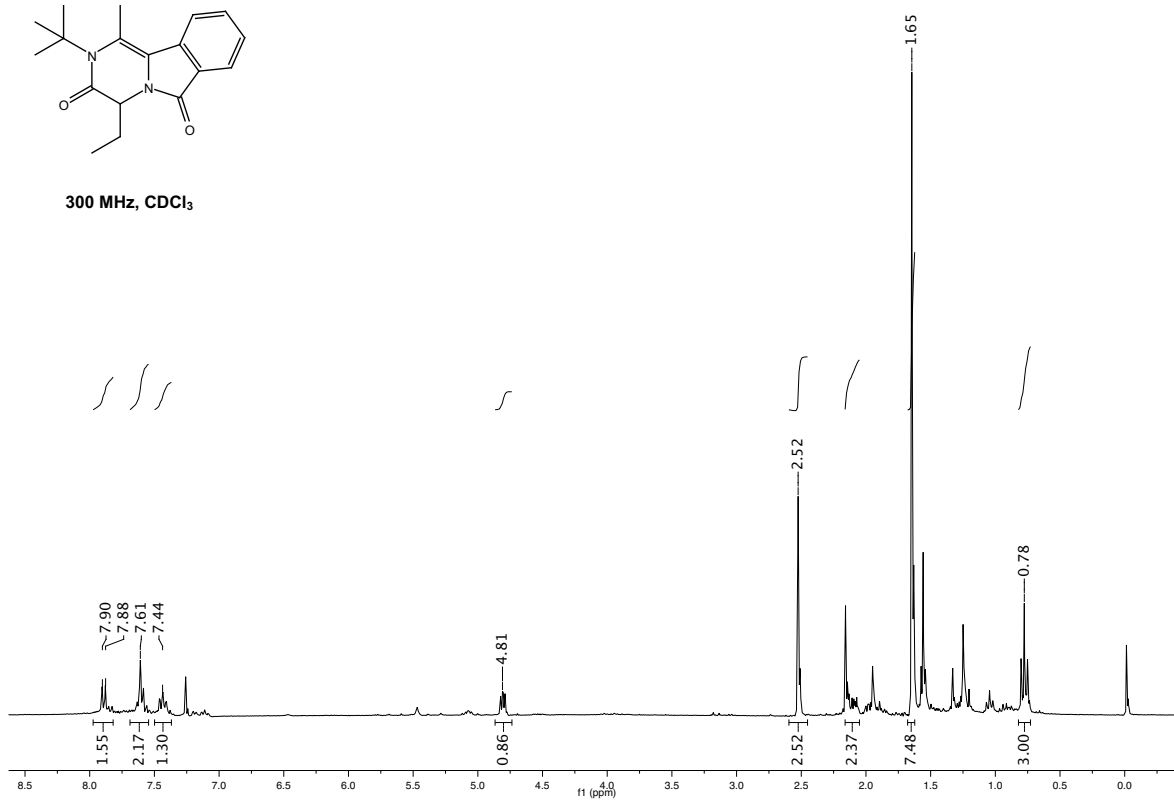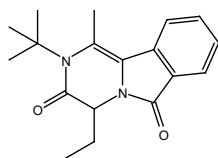75 MHz, CDCl<sub>3</sub>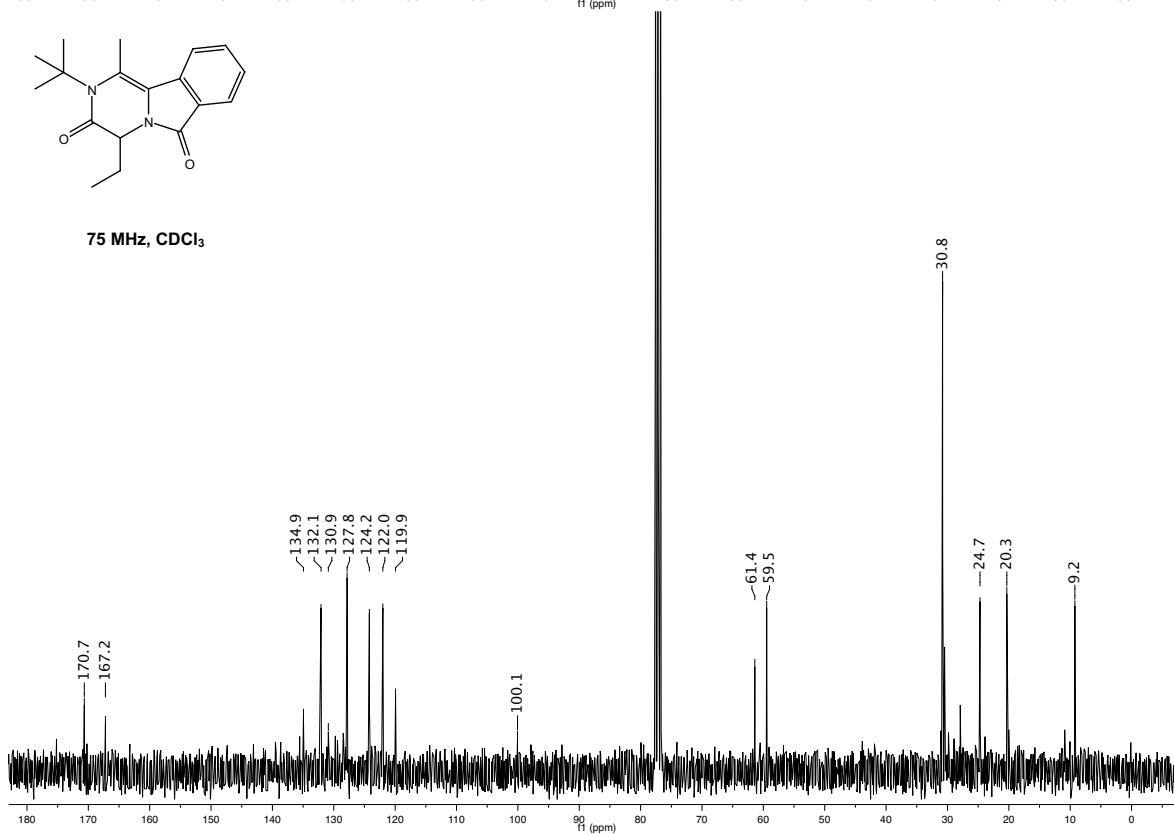

**2-Benzyl-4-isopropyl-1-methylpyrazino[2,1-*a*]isoindole-3,6(2*H*,4*H*)-dione (14v)**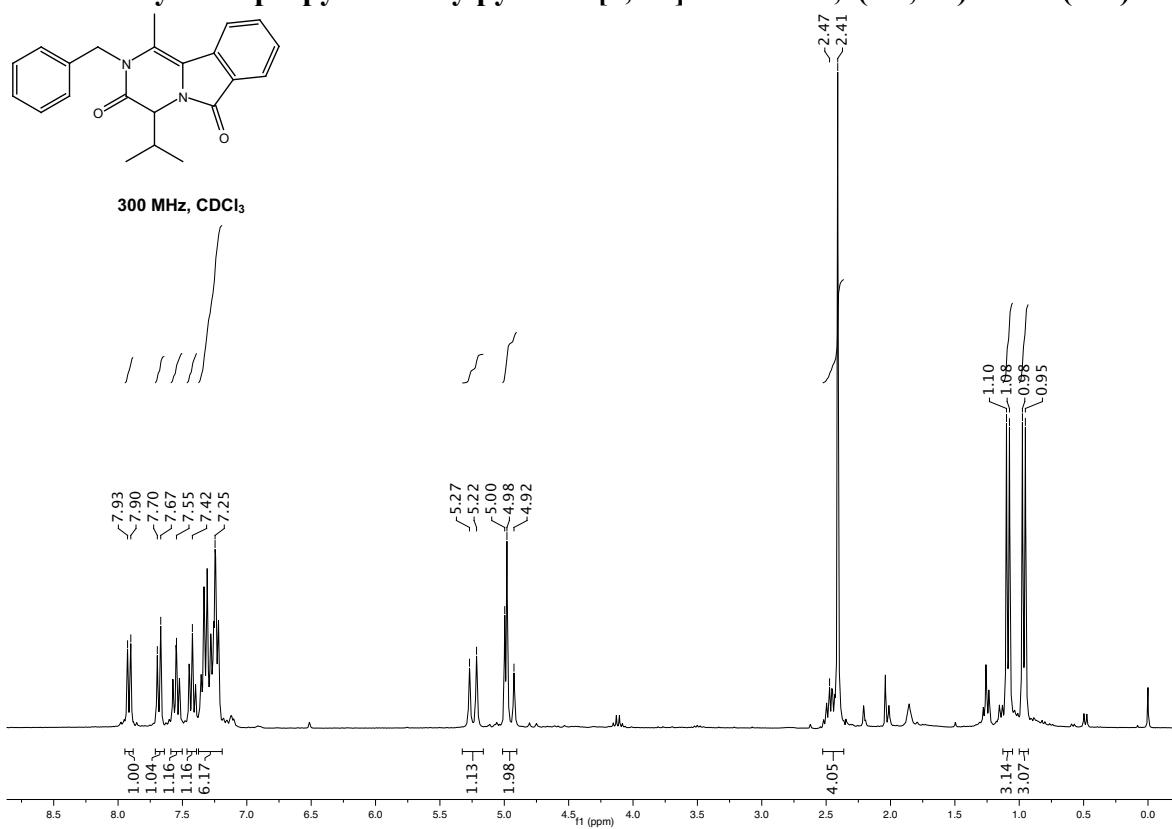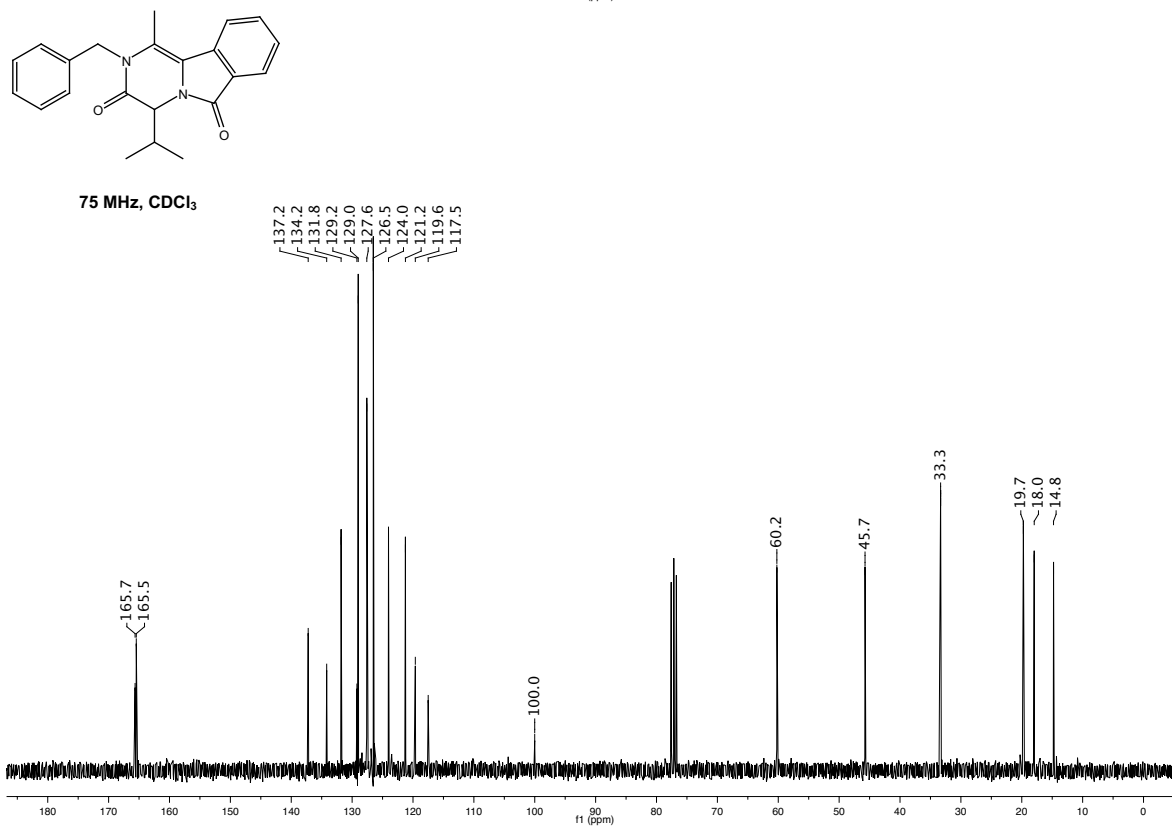

**4-Ethyl-1-methyl-2-(naphthalen-2-yl)pyrazino[2,1-*a*]isoindole-3,6(2*H*,4*H*)-dione (14w)**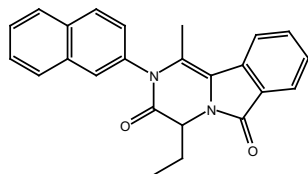300 MHz, CDCl<sub>3</sub>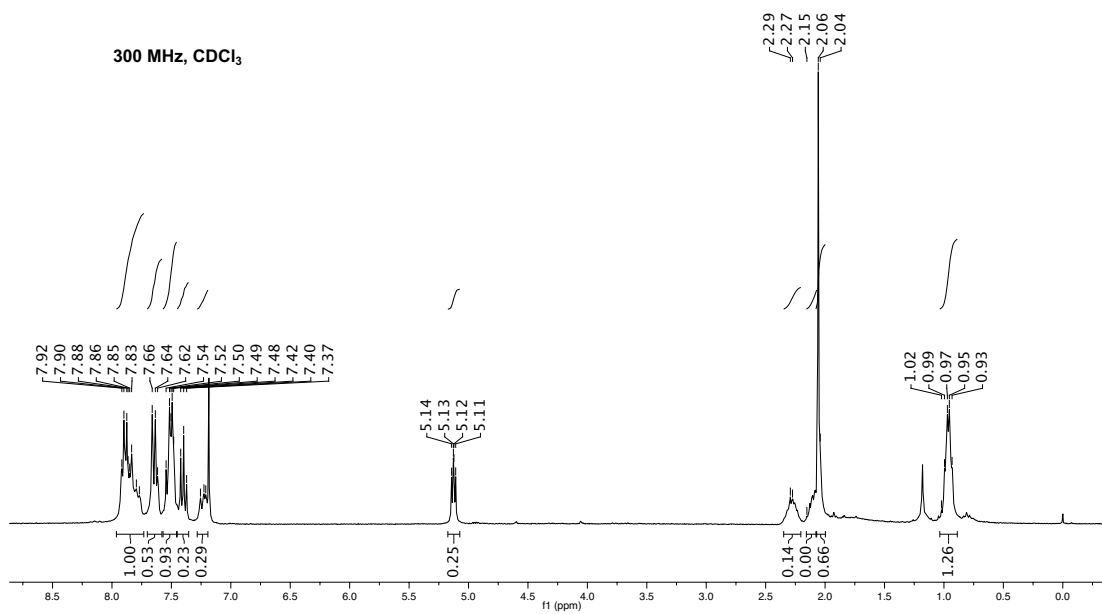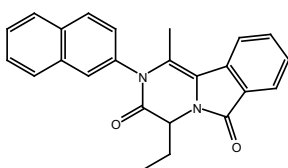75 MHz, CDCl<sub>3</sub>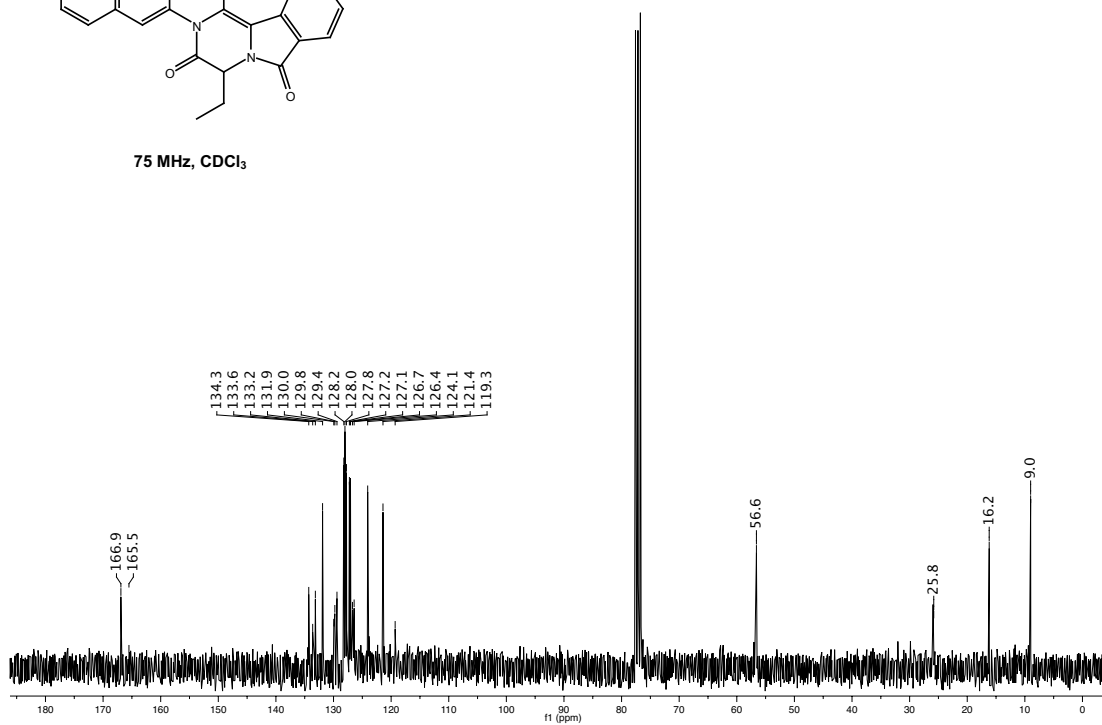

**4-Ethyl-2-(4-methoxyphenyl)-1-methyl-2H-pyrazino[2,1-a]isoquinoline-3,6(4H,7H)-dione (14x)**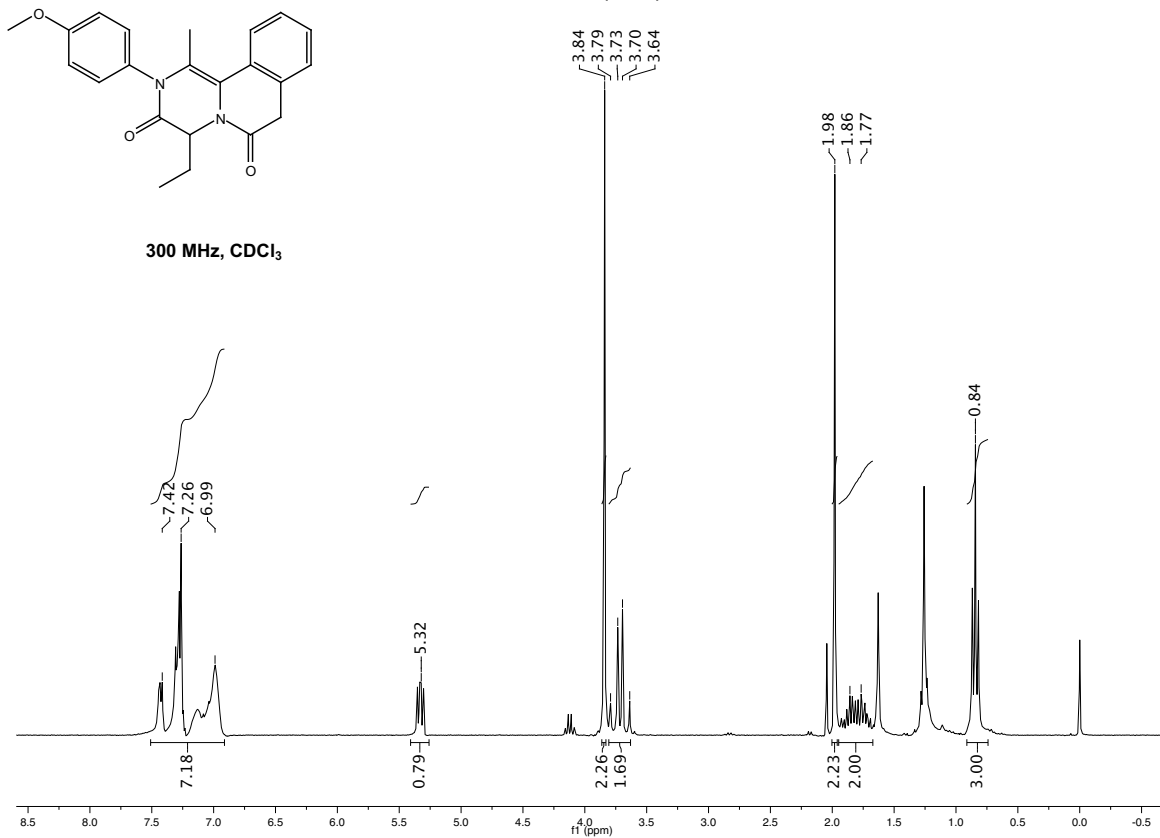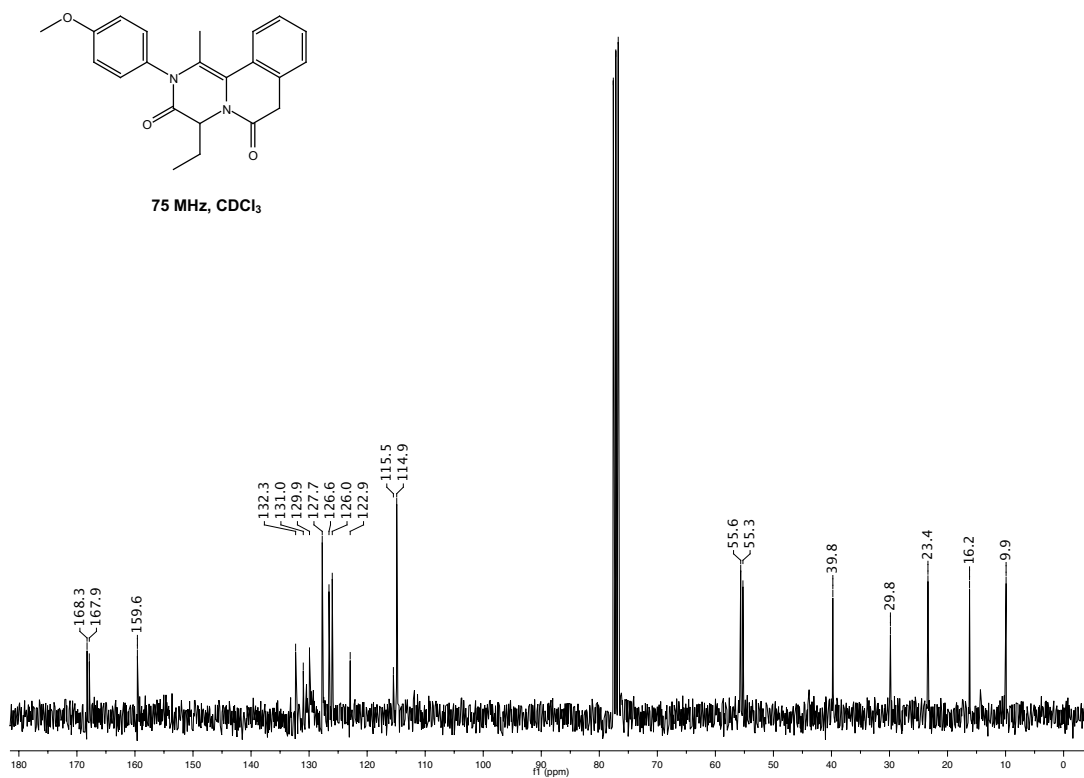

## X-Ray Crystallographic Data

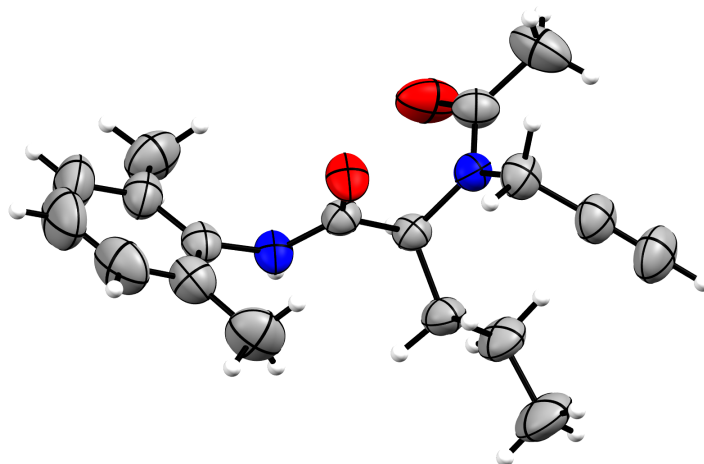

**Figure 1.** Molecular structure for compound **11a**, thermal ellipsoids are drawn at 30 % probability for all atoms except than hydrogen.

**Table 1.** Crystal data and structure refinement for **11a**. Identification code 376MGL14 (Solved by: R. A. Toscano)

|                      |                                                               |                |
|----------------------|---------------------------------------------------------------|----------------|
| Compound             | <b>11a</b>                                                    |                |
| Empirical formula    | C <sub>18</sub> H <sub>24</sub> N <sub>2</sub> O <sub>2</sub> |                |
| Formula weight       | 300.39                                                        |                |
| Temperature          | 298(2) K                                                      |                |
| Wavelength           | 0.71073 Å                                                     |                |
| Crystal system       | Orthorhombic                                                  |                |
| Space group          | <i>P</i> b c a                                                |                |
| Unit cell dimensions | <i>a</i> = 9.344(3) Å                                         | $\alpha$ = 90° |
|                      | <i>b</i> = 22.993(7) Å                                        | $\beta$ = 90°  |
|                      | <i>c</i> = 16.649(5) Å                                        | $\gamma$ = 90° |
| Volume               | 3576.9(19) Å <sup>3</sup>                                     |                |
| <i>Z</i>             | 8                                                             |                |
| Density (calculated) | 1.116 Mg/m <sup>3</sup>                                       |                |

|                                        |                                                |
|----------------------------------------|------------------------------------------------|
| Absorption coefficient                 | 0.073 mm <sup>-1</sup>                         |
| $F(000)$                               | 1296                                           |
| Crystal size / colour / shape          | 0.380 x 0.132 x 0.058 mm / colourless / prism  |
| Theta range for data collection        | 2.153 to 27.610°                               |
| Index ranges                           | -11 ≤ $h$ ≤ 12, -29 ≤ $k$ ≤ 29, -21 ≤ $l$ ≤ 14 |
| Reflections collected                  | 22418                                          |
| Independent reflections                | 4111 [ $R(\text{int}) = 0.1461$ ]              |
| Completeness to theta = 25.242°        | 99.9 %                                         |
| Measurement device                     | Bruker Smart Apex CCD diffractometer 01-670-01 |
| Absorption correction                  | Semi-empirical from equivalents                |
| Max. and min. transmission             | 0.9958 and 0.9728                              |
| Refinement method                      | Full-matrix least-squares on $F^2$             |
| Data / restraints / parameters         | 4111 / 0 / 207                                 |
| Goodness-of-fit on $F^2$               | 1.001                                          |
| Final $R$ indices [ $I > 2\sigma(I)$ ] | $R1 = 0.0763$ , $wR2 = 0.1767$                 |
| $R$ indices (all data)                 | $R1 = 0.1588$ , $wR2 = 0.2355$                 |
| Extinction coefficient                 | 0.0077(16)                                     |
| Largest diff. peak and hole            | 0.302 and -0.226 e.Å <sup>-3</sup>             |



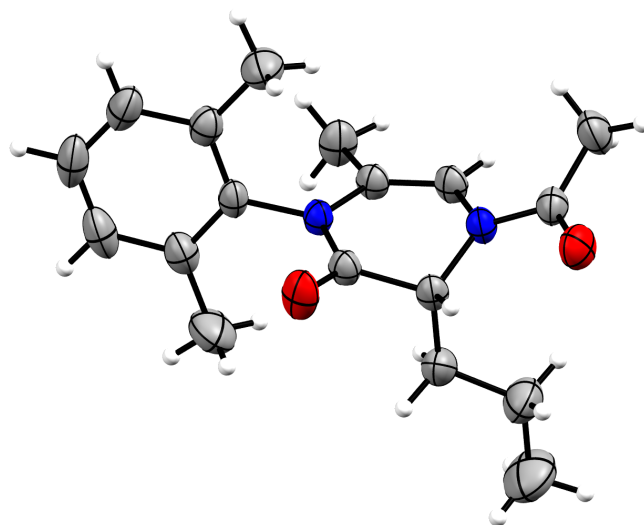

**Figure 2.** Molecular structure for compound **13a**, thermal ellipsoids are drawn at 30 % probability for all atoms except than hydrogen.

**Table 2.** Crystal data and structure refinement for **13a**. Identification code 361MGL14 (Solved by: R. A. Toscano)

|                        |                                                                                                                    |
|------------------------|--------------------------------------------------------------------------------------------------------------------|
| Compound               | <b>13a</b>                                                                                                         |
| Empirical formula      | C <sub>18</sub> H <sub>24</sub> N <sub>2</sub> O <sub>2</sub>                                                      |
| Formula weight         | 300.39                                                                                                             |
| Temperature            | 298(2) K                                                                                                           |
| Wavelength             | 0.71073 Å                                                                                                          |
| Crystal system         | Monoclinic                                                                                                         |
| Space group            | <i>P</i> 2 <sub>1</sub> /n                                                                                         |
| Unit cell dimensions   | <i>a</i> = 7.2997(3) Å      α = 90°<br><i>b</i> = 8.7192(7) Å      β = 90°<br><i>c</i> = 27.1071(5) Å      γ = 90° |
| Volume                 | 1710.00(12) Å <sup>3</sup>                                                                                         |
| <i>Z</i>               | 4                                                                                                                  |
| Density (calculated)   | 1.167 Mg/m <sup>3</sup>                                                                                            |
| Absorption coefficient | 0.076 mm <sup>-1</sup>                                                                                             |

|                                        |                                                                  |
|----------------------------------------|------------------------------------------------------------------|
| $F(000)$                               | 648                                                              |
| Crystal size / colour / shape          | 0.491 x 0.305 x 0.279 mm / colourless / prism                    |
| Theta range for data collection        | 2.456 to 27.518°                                                 |
| Index ranges                           | $-9 \leq h \leq 9$ , $-11 \leq k \leq 11$ , $-34 \leq l \leq 35$ |
| Reflections collected                  | 16910                                                            |
| Independent reflections                | 3930 [ $R(\text{int}) = 0.0343$ ]                                |
| Completeness to theta = 25.242°        | 99.8 %                                                           |
| Measurement device                     | Bruker Smart Apex CCD diffractometer 01-670-01                   |
| Absorption correction                  | Semi-empirical from equivalents                                  |
| Max. and min. transmission             | 0.9790 and 0.9635                                                |
| Refinement method                      | Full-matrix least-squares on $F^2$                               |
| Data / restraints / parameters         | 3930 / 0 / 204                                                   |
| Goodness-of-fit on $F^2$               | 1.035                                                            |
| Final $R$ indices [ $I > 2\sigma(I)$ ] | $R1 = 0.0472$ , $wR2 = 0.1161$                                   |
| $R$ indices (all data)                 | $R1 = 0.0708$ , $wR2 = 0.1310$                                   |
| Largest diff. peak and hole            | 0.201 and -0.180 e.Å <sup>-3</sup>                               |

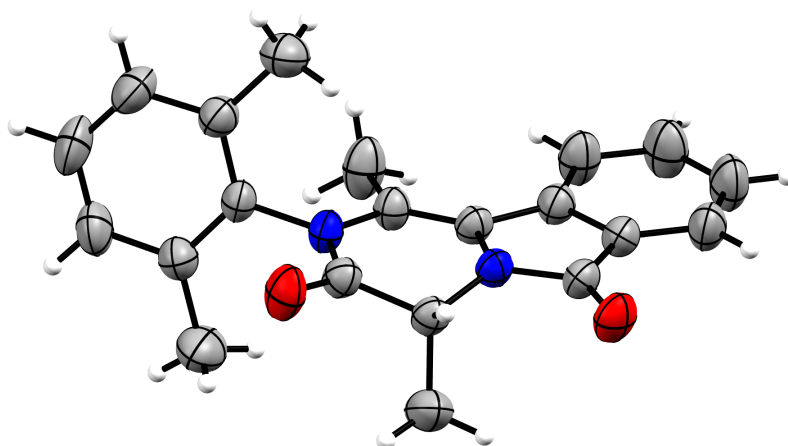

**Figure 3.** Molecular structure for compound **14r**, thermal ellipsoids are drawn at 30 % probability for all atoms except than hydrogen.

**Table 3.** Crystal data and structure refinement for **14r**. Identification code 364MGL15 (Solved by: R. A. Toscano)

|                        |                                                                                                                   |
|------------------------|-------------------------------------------------------------------------------------------------------------------|
| Compound               | <b>14r</b>                                                                                                        |
| Empirical formula      | C <sub>21</sub> H <sub>20</sub> N <sub>2</sub> O <sub>2</sub>                                                     |
| Formula weight         | 332.39                                                                                                            |
| Temperature            | 298(2) K                                                                                                          |
| Wavelength             | 0.71073 Å                                                                                                         |
| Crystal system         | Monoclinic                                                                                                        |
| Space group            | <i>P</i> 2 <sub>1</sub> /n                                                                                        |
| Unit cell dimensions   | <i>a</i> = 8.2348(7) Å      α = 90°<br><i>b</i> = 26.914(2) Å      β = 90°<br><i>c</i> = 8.2642(3) Å      γ = 90° |
| Volume                 | 1733.3(3) Å <sup>3</sup>                                                                                          |
| Z                      | 4                                                                                                                 |
| Density (calculated)   | 1.274 Mg/m <sup>3</sup>                                                                                           |
| Absorption coefficient | 0.083 mm <sup>-1</sup>                                                                                            |
| <i>F</i> (000)         | 704                                                                                                               |

|                                        |                                                                |
|----------------------------------------|----------------------------------------------------------------|
| Crystal size                           | 0.360 x 0.280 x 0.200 mm                                       |
| Theta range for data collection        | 2.712 to 25.319°                                               |
| Index ranges                           | $-9 \leq h \leq 9$ , $-32 \leq k \leq 31$ , $-9 \leq l \leq 9$ |
| Reflections collected                  | 19869                                                          |
| Independent reflections                | 3138 [ $R(\text{int}) = 0.0826$ ]                              |
| Completeness to theta = 25.242°        | 100.0 %                                                        |
| Measurement device                     | Bruker Smart Apex CCD diffractometer 01-670-01                 |
| Refinement method                      | Full-matrix least-squares on $F^2$                             |
| Data / restraints / parameters         | 3138 / 0 / 231                                                 |
| Goodness-of-fit on $F^2$               | 1.070                                                          |
| Final $R$ indices [ $I > 2\sigma(I)$ ] | $R1 = 0.0532$ , $wR2 = 0.1406$                                 |
| $R$ indices (all data)                 | $R1 = 0.0664$ , $wR2 = 0.1508$                                 |
| Extinction coefficient                 | 0.018(3)                                                       |
| Largest diff. peak and hole            | 0.250 and -0.209 e.Å <sup>-3</sup>                             |

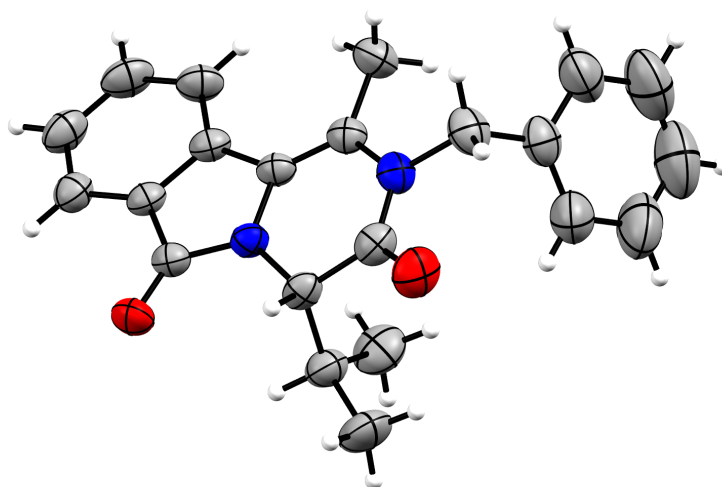

**Figure 4.** Molecular structure for compound **14v**, thermal ellipsoids are drawn at 30 % probability for all atoms except than hydrogen.

**Table 4.** Crystal data and structure refinement for **14v**. Identification code 364MGL15  
(Solved by: R. A. Toscano)

|                        |                                                               |                     |
|------------------------|---------------------------------------------------------------|---------------------|
| Compound               | <b>14v</b>                                                    |                     |
| Empirical formula      | C <sub>22</sub> H <sub>22</sub> N <sub>2</sub> O <sub>2</sub> |                     |
| Formula weight         | 346.41                                                        |                     |
| Temperature            | 296(2) K                                                      |                     |
| Wavelength             | 0.71073 Å                                                     |                     |
| Crystal system         | Monoclinic                                                    |                     |
| Space group            | <i>P</i> 2 <sub>1</sub> /n                                    |                     |
| Unit cell dimensions   | <i>a</i> = 14.0741(7) Å                                       | $\alpha = 90^\circ$ |
|                        | <i>b</i> = 8.4735(2) Å                                        | $\beta = 90^\circ$  |
|                        | <i>c</i> = 16.5267(3) Å                                       | $\gamma = 90^\circ$ |
| Volume                 | 1785.99(11) Å <sup>3</sup>                                    |                     |
| <i>Z</i>               | 4                                                             |                     |
| Density (calculated)   | 1.288 Mg/m <sup>3</sup>                                       |                     |
| Absorption coefficient | 0.083 mm <sup>-1</sup>                                        |                     |

|                                        |                                                                   |
|----------------------------------------|-------------------------------------------------------------------|
| $F(000)$                               | 736                                                               |
| Crystal size                           | 0.256 x 0.176 x 0.087 mm                                          |
| Theta range for data collection        | 2.497 to 25.390°                                                  |
| Index ranges                           | $-16 \leq h \leq 16$ , $-10 \leq k \leq 8$ , $-19 \leq l \leq 19$ |
| Reflections collected                  | 13978                                                             |
| Independent reflections                | 3275 [ $R(\text{int}) = 0.0317$ ]                                 |
| Completeness to theta = 25.242°        | 99.6 %                                                            |
| Measurement device                     | Bruker Smart Apex CCD diffractometer 01-670-01                    |
| Refinement method                      | Full-matrix least-squares on $F^2$                                |
| Data / restraints / parameters         | 3275 / 0 / 238                                                    |
| Goodness-of-fit on $F^2$               | 1.040                                                             |
| Final $R$ indices [ $I > 2\sigma(I)$ ] | $R1 = 0.0409$ , $wR2 = 0.1019$                                    |
| $R$ indices (all data)                 | $R1 = 0.0499$ , $wR2 = 0.1081$                                    |
| Largest diff. peak and hole            | 0.139 and -0.151 e.Å <sup>-3</sup>                                |
